# Supplementary material for: Molecular dissection of box jellyfish venom cytotoxicity highlights an effective venom antidote
Source: Nat Commun. 2019 Apr 30;10:1655. doi: 10.1038/s41467-019-09681-1 (PMC6491561; doi:10.1038/s41467-019-09681-1)
Supplement: Supplementary file 3 — Supplementary Data 2 [file 41467_2019_9681_MOESM3_ESM.xlsx]

## Sheet: Summary
id	num	pos|score	pos|p-value	pos|rank	pos|goodsgrna
SCAP	6	1.5535e-17	2.367e-07	1	6
ATP2B1	6	5.0789e-17	2.367e-07	2	6
SGMS1	6	1.6159e-13	2.367e-07	3	6
SREBF2	6	1.8455e-10	2.367e-07	4	4
MBTPS1	6	1.3505e-07	2.367e-07	5	2
MBTPS2	6	1.169e-05	3.4321e-05	6	4
MIR450a-2	4	3.4366e-05	8.308e-05	7	3
PIGU	6	7.6724e-05	0.00018107	8	3
SLC25A51	6	0.0001425	0.00034723	9	2
SPPL3	6	0.00014536	0.00035386	10	2
CBY1	6	0.00014683	0.00035575	11	3
VPS45	6	0.00015407	0.00036759	12	2
EFNB2	6	0.0001866	0.00044002	13	3
RBM26	6	0.00022392	0.0005347	14	2
ANO1	6	0.00023811	0.0005631	15	2
PDHB	6	0.00028289	0.00065257	16	2
RNF170	6	0.00030646	0.0007018	17	1
MAGEL2	6	0.00031338	0.00071837	18	3
CD109	6	0.0003536	0.00080216	19	1
DMRTA1	6	0.00039675	0.00089731	20	2
BEX5	6	0.00045813	0.0010232	21	2
BOP1	6	0.00049502	0.0010952	22	1
TELO2	6	0.00068356	0.0014644	23	1
ADM2	6	0.00069943	0.0014891	24	1
HYDIN	6	0.00080144	0.0016808	25	1
GOLPH3	6	0.00084808	0.0017783	26	2
ESX1	6	0.00087286	0.0018261	27	2
NAE1	6	0.0008957	0.001863	28	1
ABCE1	6	0.00090495	0.0018758	29	2
RNF151	6	0.0009192	0.0019028	30	1
KIAA0825	6	0.001039	0.0021139	31	2
ZRANB3	6	0.0010903	0.0022048	32	2
OPA3	6	0.0011203	0.0022654	33	2
FOXD4L5	6	0.0011205	0.0022659	34	2
MFNG	6	0.0012195	0.0024552	35	2
RBM41	6	0.0012338	0.0024761	36	1
WDR37	6	0.0012413	0.002486	37	1
CNBD2	6	0.001296	0.0025774	38	1
BTN3A1	6	0.0013041	0.0025925	39	1
C8orf42	6	0.001351	0.0026721	40	2
EDA	6	0.001367	0.0027033	41	1
MIR892a	4	0.001374	0.0027156	42	2
PTPRQ	6	0.0013904	0.002745	43	1
MIR4257	4	0.0014298	0.0028117	44	1
C10orf68	6	0.0014328	0.0028183	45	2
FIBIN	6	0.0014375	0.0028245	46	1
MAEA	6	0.001453	0.0028501	47	1
FA2H	6	0.0015066	0.0029528	48	2
MIR10b	4	0.0015554	0.0030385	49	1
PPAP2C	6	0.0015677	0.0030621	50	2
AKR1E2	6	0.001612	0.0031393	51	2
PRR13	6	0.0016268	0.0031691	52	1
MIR125b-1	4	0.0016565	0.0032273	53	2
SALL4	6	0.001673	0.0032562	54	1
MIR606	4	0.0017172	0.0033353	55	2
C4orf27	6	0.0017278	0.0033519	56	1
MIR3127	4	0.0017329	0.0033604	57	2
HLTF	6	0.0017439	0.0033741	58	1
MIR1250	4	0.0017473	0.0033836	59	2
C1orf228	6	0.0017505	0.0033902	60	2
OXNAD1	6	0.001755	0.0033978	61	2
NABP1	6	0.0017672	0.0034172	62	1
ATXN7L2	6	0.0018311	0.0035346	63	1
ZNF517	6	0.0018466	0.0035654	64	2
MIR1323	4	0.0018829	0.0036259	65	2
CTLA4	6	0.0019348	0.0037178	66	2
LAIR2	6	0.0019637	0.0037604	67	1
ZCCHC18	6	0.0019789	0.0037864	68	1
TTC34	6	0.0020027	0.003829	69	2
KIAA0754	6	0.002078	0.0039602	70	2
GK	6	0.0021045	0.0040066	71	1
TMEM241	6	0.0021673	0.0041164	72	1
MIA3	6	0.0022464	0.0042603	73	1
ANG	6	0.0022778	0.0043015	74	1
HOXB6	6	0.0023185	0.0043706	75	2
CCDC127	6	0.0023624	0.0044402	76	2
KAT8	6	0.0023793	0.0044724	77	1
ZNF460	6	0.0024033	0.0045131	78	1
VPS25	6	0.0024183	0.004533	79	1
NPSR1	6	0.0024264	0.0045434	80	1
FOXP2	6	0.0024682	0.0046272	81	2
MOXD1	6	0.0025438	0.0047436	82	1
KCNE1	6	0.0025503	0.0047479	83	2
HIST1H2AJ	6	0.0026231	0.0048667	84	1
NAT8L	6	0.002662	0.0049268	85	2
CKM	6	0.00285	0.0052184	86	1
OR5B3	6	0.0028652	0.0052383	87	1
HBQ1	6	0.0028785	0.0052587	88	2
TAF3	6	0.0029026	0.005297	89	2
MIR887	4	0.0029628	0.0053822	90	1
C7orf65	6	0.0029674	0.005386	91	2
CARD10	6	0.0029935	0.0054196	92	2
BTBD1	6	0.0030457	0.0054892	93	1
PMEL	6	0.0030575	0.0055129	94	2
POC5	6	0.0031324	0.0056284	95	1
BTBD18	6	0.0031448	0.0056464	96	2
DFNA5	6	0.0031742	0.0056847	97	2
LAPTM5	6	0.0031794	0.0056918	98	1
AVPI1	6	0.0031889	0.0057117	99	2
EMC1	6	0.0032206	0.0057586	100	2
CTXN3	6	0.0032735	0.0058433	101	1
C2CD4C	6	0.0033206	0.0059153	102	1
MIR509-1	4	0.0033272	0.0059262	103	2
C7orf31	6	0.0033502	0.005964	104	2
PTPRC	6	0.0033593	0.0059754	105	2
BOLA1	6	0.0033997	0.0060331	106	2
AAK1	6	0.0034214	0.006062	107	2
LTBP1	6	0.003422	0.0060625	108	1
MIR124-2	4	0.0034392	0.0060885	109	1
C14orf183	6	0.0035088	0.0061837	110	1
C14orf178	6	0.0035558	0.006259	111	1
CNGA4	6	0.0035767	0.0062945	112	2
ABCA1	6	0.0036101	0.006347	113	1
OAS2	6	0.0036266	0.006365	114	2
ANO6	6	0.0036499	0.0064005	115	1
OR52I2	6	0.0036728	0.0064374	116	1
LPAR1	6	0.0037274	0.0065198	117	1
ADPGK	6	0.0037355	0.0065312	118	1
GCLM	6	0.0039303	0.0068365	119	2
GLS	6	0.0039791	0.0069103	120	1
OCLN	6	0.004004	0.006943	121	1
FAM198B	6	0.0040261	0.0069761	122	1
MIR133a-2	4	0.0040353	0.0069927	123	1
TMEM204	6	0.004049	0.007015	124	1
MIR4270	4	0.0040667	0.0070434	125	1
PSMB2	6	0.0040732	0.0070533	126	1
PPP1R3C	6	0.0041191	0.0071153	127	1
ZNF596	6	0.0041202	0.0071167	128	1
TAGAP	6	0.004187	0.0072256	129	2
DSG3	6	0.0042613	0.0073359	130	1
ABHD17B	6	0.0042839	0.0073681	131	2
BIRC6	6	0.0043083	0.0074017	132	2
C12orf61	6	0.0043676	0.007486	133	2
MID1	6	0.0044063	0.0075475	134	2
TMEM184B	6	0.0044118	0.007557	135	1
ZKSCAN5	6	0.0044323	0.0075901	136	2
FNDC8	6	0.0044411	0.0076081	137	2
SYCE3	6	0.0045006	0.0076962	138	2
IGSF10	6	0.0046019	0.0078486	139	2
PCDH8	6	0.004613	0.0078661	140	1
PRMT2	6	0.0046374	0.0078959	141	1
ZNF404	6	0.0046486	0.0079177	142	2
LOC100129636	6	0.004656	0.0079277	143	2
CSNK2A2	6	0.0046705	0.0079499	144	2
ATCAY	6	0.004694	0.007984	145	1
DGKG	6	0.0048238	0.0081781	146	1
ARL6IP6	6	0.0048254	0.00818	147	1
HRH4	6	0.0049236	0.0083343	148	2
FAM174A	6	0.0049804	0.0084119	149	1
MIR3927	4	0.0050206	0.0084721	150	2
NOC4L	6	0.005039	0.0084948	151	1
CHCHD5	6	0.0050431	0.0085028	152	2
CYP2R1	6	0.0050479	0.0085099	153	2
C2orf70	6	0.0050515	0.0085151	154	1
MIR3926-1	4	0.0051141	0.0086103	155	1
HNF4A	6	0.0051369	0.0086415	156	1
PASD1	6	0.0051767	0.0086983	157	1
NDUFA8	6	0.0051831	0.0087092	158	2
STAM2	6	0.0052271	0.0087793	159	1
STEAP1	6	0.0052656	0.0088337	160	2
SLC38A8	6	0.0052898	0.0088806	161	1
ASNS	6	0.0053525	0.0089805	162	1
DCAF4L1	6	0.0053839	0.0090255	163	1
PLXNA4	6	0.0053893	0.0090311	164	1
IL10	6	0.0054059	0.0090567	165	2
C14orf180	6	0.0054647	0.009141	166	2
FAT2	6	0.0055353	0.0092456	167	2
PRKAG2	6	0.0055432	0.0092565	168	2
KCNN3	6	0.0055697	0.0092995	169	2
ZNF257	6	0.0055768	0.009309	170	2
CAPN8	5	0.0056102	0.0093649	171	2
RGL2	6	0.0056264	0.0093833	172	2
RDH5	6	0.0056348	0.0093938	173	1
NAPA	6	0.0056817	0.0094652	174	2
TLR9	6	0.0057216	0.0095268	175	2
NXPE4	6	0.0057296	0.0095391	176	2
IQUB	6	0.0057402	0.0095575	177	1
MIR4734	4	0.00576	0.0095836	178	1
MIR7162	4	0.0057651	0.0095916	179	1
HIST1H2AH	6	0.0058391	0.0097067	180	1
DCBLD1	6	0.005859	0.0097389	181	1
MGAT5B	6	0.005906	0.0098222	182	1
CNTN6	6	0.0059719	0.0099235	183	2
MIR6132	4	0.0060866	0.010094	184	2
ORAI3	6	0.0061158	0.010134	185	1
GPR113	6	0.0061569	0.010198	186	2
PIFO	6	0.0061675	0.010217	187	1
IQSEC2	6	0.0061878	0.010251	188	1
IFITM1	6	0.0062321	0.010313	189	1
PTPN5	6	0.0062409	0.010326	190	1
MIR6087	4	0.0062477	0.010336	191	1
MIR3649	4	0.00629	0.010395	192	2
PGD	6	0.0062928	0.010399	193	1
MOB3B	6	0.0063122	0.010432	194	2
SRA1	6	0.0063555	0.010497	195	1
MIR635	4	0.0063892	0.010551	196	1
GPR33	6	0.0064203	0.0106	197	2
C6orf170	6	0.0064426	0.010633	198	2
STOML3	6	0.0064727	0.01068	199	2
PTGDR	6	0.0065538	0.010803	200	1
ZIC2	6	0.0066163	0.010894	201	1
MIR550a-1	4	0.0067296	0.011069	202	2
PNPLA8	6	0.0067356	0.011076	203	2
RFPL4B	6	0.0067658	0.011122	204	2
PIGQ	6	0.0067981	0.011166	205	1
INPP4B	6	0.0068538	0.011257	206	2
IFNA21	6	0.006892	0.011321	207	1
GRIN3B	6	0.0069116	0.011351	208	2
EFNA5	6	0.0069291	0.011376	209	1
IRF2	6	0.0069357	0.011385	210	1
NEK8	6	0.0069483	0.011398	211	2
DEPDC1	6	0.0069764	0.011434	212	2
GLUD2	6	0.0069916	0.011454	213	1
MIR4481	4	0.0070134	0.01148	214	1
SUFU	6	0.0070139	0.01148	215	1
MIR6836	4	0.0070204	0.011494	216	2
PDLIM2	6	0.0070466	0.011538	217	2
CCDC106	6	0.0070747	0.011578	218	2
STRA6	6	0.0071167	0.011648	219	2
GATAD1	6	0.0071266	0.011667	220	1
TMEM30A	6	0.0071579	0.011718	221	2
SCN3B	6	0.0071736	0.011741	222	1
TICRR	6	0.0072014	0.011789	223	2
DDAH2	6	0.0072205	0.011818	224	1
JMJD8	6	0.0072418	0.011845	225	1
GMEB1	6	0.0072483	0.011853	226	1
TM4SF18	6	0.0072763	0.011882	227	2
RAB40A	6	0.0073264	0.011952	228	1
NAP1L1	6	0.0073266	0.011953	229	1
MYEF2	6	0.0074045	0.012047	230	1
FBXO24	6	0.0074082	0.012052	231	1
MIR320d-2	4	0.0075366	0.012212	232	1
MAGEB3	6	0.0075544	0.012236	233	1
CLCA2	6	0.0075608	0.012242	234	2
MIR4999	4	0.0076627	0.012371	235	2
KCTD8	6	0.0077366	0.012456	236	1
APBB3	6	0.0077419	0.012465	237	1
MIR4754	4	0.0078352	0.012574	238	1
KIF5B	6	0.0079447	0.012711	239	2
FAM49B	6	0.0079513	0.012716	240	1
CSNK1A1	6	0.0079711	0.012742	241	1
MIR129-1	4	0.0081118	0.012899	242	1
UGT3A2	6	0.0081587	0.012958	243	1
PLCZ1	6	0.0081721	0.012974	244	1
CHST1	6	0.0081794	0.012984	245	1
DCAF8L1	6	0.0082766	0.013088	246	2
FLRT2	6	0.0083912	0.013233	247	1
MIR2277	4	0.0084225	0.013275	248	1
CST11	6	0.0084401	0.013296	249	1
HTR4	6	0.0084638	0.01333	250	2
SLC43A1	6	0.0085442	0.013435	251	2
FAM194B	6	0.0086123	0.013517	252	2
BTBD10	6	0.0086326	0.013537	253	2
MURC	6	0.0086745	0.013578	254	1
DSCAM	6	0.0086792	0.013582	255	1
MIR130a	4	0.0087042	0.013612	256	1
SLC28A3	6	0.0087893	0.013712	257	2
LRRC58	6	0.0087916	0.013714	258	2
CNTD2	6	0.0088099	0.013739	259	1
PAGE4	6	0.0088647	0.013818	260	2
CAMK2D	6	0.008929	0.013908	261	1
LRRC57	6	0.0089914	0.013979	262	1
GPR132	6	0.009078	0.014094	263	2
KCNQ5	6	0.0090798	0.014095	264	1
TANGO6	6	0.0090926	0.014111	265	1
GPR179	6	0.0091163	0.01414	266	1
IMPA1	6	0.0091901	0.014237	267	1
ADCK5	6	0.0091973	0.014244	268	2
CDCA7	6	0.0092	0.014246	269	1
TEKT1	6	0.0092838	0.014345	270	1
CRYM	6	0.009356	0.014431	271	1
TNNT2	6	0.0093614	0.014437	272	1
DOM3Z	6	0.0093775	0.014454	273	1
GALNT11	6	0.0094152	0.014504	274	2
ENTPD7	6	0.009512	0.014608	275	1
SUPT3H	6	0.0095178	0.014615	276	1
NOX3	6	0.0095215	0.014618	277	2
ZFAT	6	0.0096054	0.014731	278	2
SLIT3	6	0.0096118	0.014741	279	1
PTCD1	6	0.0096427	0.014785	280	1
MIR4267	4	0.0096585	0.014806	281	1
GXYLT1	6	0.0096712	0.014821	282	2
LGALS9B	6	0.0097406	0.014905	283	1
CCDC89	6	0.0097992	0.014985	284	1
CHRNA10	6	0.0098581	0.015054	285	2
CYBA	6	0.0098717	0.01507	286	2
TMED5	6	0.0098929	0.015103	287	1
FBXL6	6	0.0099019	0.015114	288	1
FOXC2	6	0.0099245	0.015139	289	1
NAGLU	6	0.0099273	0.015143	290	2
HAX1	6	0.0099278	0.015143	291	1
MIR622	4	0.0099571	0.01518	292	1
OR6C4	6	0.0099902	0.015225	293	1
FAM153A	6	0.010039	0.015286	294	2
ARL8B	6	0.01009	0.015351	295	2
SULT1B1	6	0.010142	0.01541	296	2
FAM72B	6	0.010193	0.015463	297	1
GLRX3	6	0.0102	0.015472	298	2
GLT6D1	6	0.010215	0.015489	299	2
HTR2B	6	0.010221	0.015494	300	1
PDE1B	6	0.010237	0.015515	301	1
HAS3	6	0.01024	0.015518	302	1
MIR3673	4	0.010271	0.015556	303	1
IFT27	6	0.010489	0.01582	304	1
DTNA	6	0.010491	0.015821	305	2
OR5K1	6	0.010525	0.01586	306	1
KCNH4	6	0.010548	0.015892	307	1
TARSL2	6	0.01057	0.015917	308	1
DPEP3	6	0.010576	0.015923	309	2
PPP1R14B	6	0.010603	0.01596	310	1
FAM160B2	6	0.010638	0.015998	311	2
TUT1	6	0.010645	0.016003	312	2
GOLPH3L	6	0.01068	0.016044	313	1
MIR302c	4	0.010736	0.016108	314	1
PCDHGA6	6	0.010743	0.016112	315	1
SLCO6A1	6	0.010759	0.016131	316	1
NUTM2F	6	0.010781	0.016163	317	2
GRTP1	6	0.010874	0.016275	318	2
TULP2	6	0.010894	0.0163	319	1
AGAP11	6	0.010915	0.016326	320	1
PTP4A3	6	0.010923	0.016333	321	1
ZNF354C	6	0.010947	0.016369	322	1
GOLGA4	6	0.010988	0.016418	323	1
EFCAB6	6	0.011045	0.016495	324	2
RNFT2	6	0.011051	0.016502	325	1
CMPK2	6	0.011071	0.016526	326	1
KRTAP4-5	6	0.011081	0.01654	327	1
PDE6D	6	0.011083	0.016544	328	2
TAAR8	6	0.011144	0.01663	329	1
FAM219A	6	0.011157	0.016645	330	1
CCDC59	6	0.011183	0.016676	331	1
PRDM7	6	0.011251	0.01675	332	1
COX7A2L	6	0.011275	0.016779	333	2
MIR4650-1	4	0.011277	0.016784	334	1
KLHL17	6	0.011298	0.016812	335	2
BMP6	6	0.0113	0.016815	336	1
QRFPR	6	0.011332	0.016848	337	1
GPR125	6	0.011336	0.016853	338	2
MIR891a	4	0.011391	0.01693	339	1
RBM6	6	0.011485	0.017043	340	1
EFR3B	6	0.011488	0.017047	341	1
LPPR5	6	0.011513	0.017081	342	1
GLOD5	6	0.011522	0.017091	343	2
GOLM1	6	0.011531	0.017101	344	1
EVA1C	6	0.011538	0.01711	345	1
DNAJC7	6	0.01155	0.017129	346	1
GATA6	6	0.011616	0.017212	347	1
ZC2HC1B	6	0.011631	0.017228	348	2
USP17L24	6	0.011707	0.01733	349	1
PSMD10	6	0.011772	0.01741	350	1
ERN1	6	0.01178	0.017419	351	2
CYLC2	6	0.011812	0.017466	352	1
OAS3	6	0.011859	0.017532	353	1
PPP1R36	6	0.011914	0.017612	354	2
VAT1	6	0.011923	0.017622	355	1
IL17RD	6	0.011985	0.017712	356	1
ARHGAP19	6	0.012046	0.01778	357	1
ASPHD1	6	0.012083	0.017819	358	1
BACE1	6	0.01211	0.017853	359	1
HOXA4	6	0.012144	0.017894	360	2
HOOK2	6	0.012172	0.017929	361	1
AARSD1	6	0.012215	0.017982	362	2
MYL7	6	0.012239	0.018006	363	1
MIR3621	4	0.012315	0.018101	364	1
CABS1	6	0.012363	0.018165	365	1
C8orf44	6	0.01242	0.018241	366	1
PKLR	6	0.012421	0.018242	367	1
DAW1	6	0.012431	0.018254	368	1
PCDHB1	6	0.012448	0.018276	369	2
MIR7-2	4	0.012488	0.01832	370	1
FBXO45	6	0.012524	0.018366	371	1
STK11IP	6	0.01255	0.018394	372	1
VPS33A	6	0.012628	0.018487	373	1
SAMD5	6	0.012666	0.018528	374	2
JMY	6	0.012705	0.018576	375	2
C11orf71	6	0.012705	0.018576	376	1
OLFM4	6	0.012733	0.018618	377	1
KIAA1257	6	0.012747	0.018641	378	1
FRMD1	6	0.01278	0.018681	379	2
CLIC5	6	0.012794	0.018705	380	1
SELENBP1	6	0.012857	0.018792	381	1
ATAD3B	6	0.012881	0.018817	382	1
KRTAP16-1	6	0.012927	0.018872	383	2
ZBTB33	6	0.01305	0.019016	384	1
NKAIN2	6	0.013108	0.019081	385	2
PVRIG	6	0.013121	0.019096	386	1
FREM1	6	0.013138	0.019112	387	2
IFI16	6	0.013148	0.019125	388	1
PDXP	6	0.013202	0.019198	389	2
MED13L	6	0.0133	0.019319	390	1
PCDHB3	6	0.013308	0.019329	391	1
S100A14	6	0.013355	0.019391	392	1
NOXO1	6	0.013372	0.019411	393	2
TRIM14	6	0.013415	0.019455	394	1
BANF2	6	0.013425	0.019469	395	1
MIR3199-1	4	0.013449	0.019497	396	1
GTF2F2	6	0.013509	0.019557	397	1
SLC6A6	6	0.013542	0.019597	398	1
HEXA	6	0.013542	0.019597	399	1
SPATA7	6	0.013574	0.019636	400	2
TEX15	6	0.013633	0.019705	401	2
TRPC1	6	0.013635	0.019708	402	1
FAT4	6	0.013666	0.019747	403	1
POLDIP3	6	0.013729	0.019822	404	1
MIDN	6	0.013737	0.019831	405	1
MSL2	6	0.013768	0.019868	406	1
ZFP41	6	0.013791	0.019894	407	1
OARD1	6	0.013808	0.019913	408	1
SLFN5	6	0.013822	0.019931	409	1
APOLD1	6	0.013853	0.019967	410	1
E2F4	6	0.013962	0.020101	411	1
PLN	1	0.014044	0.020187	412	1
PLA2G4C	6	0.014049	0.020193	413	1
ATAD3C	6	0.014103	0.020242	414	1
PFDN2	6	0.014143	0.020279	415	1
DEGS1	6	0.014164	0.020301	416	1
ITGA2	6	0.014183	0.020319	417	1
PIK3R2	6	0.014226	0.020366	418	1
DYSF	6	0.01426	0.0204	419	1
C13orf35	6	0.014322	0.020456	420	2
DDAH1	6	0.014336	0.020471	421	1
ANKRD1	6	0.014383	0.020516	422	1
FAM76B	6	0.014476	0.020613	423	1
ZFYVE21	6	0.014571	0.020694	424	2
ELOVL2	6	0.014649	0.02077	425	1
CHRM2	6	0.014724	0.020846	426	1
WFDC6	6	0.014782	0.020905	427	1
CARD6	6	0.014786	0.020908	428	1
RFK	6	0.01486	0.02098	429	1
FAF1	6	0.01491	0.021028	430	1
PCDHA5	6	0.014985	0.021097	431	1
RPS6KA2	6	0.015079	0.021189	432	1
PDZK1IP1	6	0.015085	0.021194	433	2
APP	6	0.015097	0.021205	434	1
MYL12B	6	0.01511	0.021215	435	1
SYT6	6	0.01513	0.021236	436	1
ZNF33B	6	0.015201	0.021306	437	2
MFSD1	6	0.015204	0.021308	438	1
RPS2	6	0.015223	0.021327	439	1
C12orf68	6	0.015235	0.021341	440	1
CCT3	6	0.015238	0.021344	441	1
LRIG1	6	0.015363	0.021483	442	1
ARCN1	6	0.01541	0.021533	443	1
ALDH3A2	6	0.01547	0.02159	444	1
ZNF267	6	0.015503	0.021624	445	1
ZFP62	6	0.015506	0.021626	446	1
MS4A6A	6	0.015532	0.021647	447	1
C9orf169	6	0.015547	0.021664	448	1
SMARCA5	6	0.015584	0.021703	449	1
TMEM176B	6	0.015656	0.021782	450	1
GK5	6	0.01569	0.021812	451	1
MBNL2	6	0.015713	0.021831	452	2
PPP1R16A	6	0.015765	0.021879	453	1
NLGN2	6	0.015783	0.021897	454	1
GDF11	6	0.015804	0.021921	455	2
DRAM2	6	0.015827	0.021944	456	1
SULT1E1	6	0.01583	0.021947	457	1
UNKL	6	0.015843	0.021959	458	1
PSPC1	6	0.015921	0.022038	459	1
ATXN1	6	0.015923	0.02204	460	1
AMFR	6	0.015952	0.022074	461	1
LATS1	6	0.016016	0.022144	462	1
COL5A1	6	0.016091	0.022225	463	1
NUDT7	6	0.016153	0.022283	464	1
PLXNA3	6	0.016185	0.022312	465	2
ZDHHC2	6	0.016201	0.02233	466	1
MBOAT4	6	0.016202	0.022331	467	1
RIOK1	6	0.016213	0.02234	468	1
TMEM160	6	0.016343	0.022469	469	1
C4orf17	6	0.016356	0.02248	470	1
PRHOXNB	6	0.016464	0.022591	471	1
OR13A1	6	0.016482	0.022613	472	1
MPC1L	6	0.016483	0.022614	473	1
HABP4	6	0.016511	0.022649	474	1
SLC26A3	6	0.016623	0.022757	475	1
KIR2DL4	6	0.01665	0.02278	476	1
FAM110B	6	0.016716	0.022843	477	1
DNAJB2	6	0.016716	0.022843	478	1
SPATA17	6	0.016732	0.022862	479	1
CDK2AP2	6	0.016744	0.022877	480	1
BHMT	6	0.016794	0.022932	481	1
COQ4	6	0.016825	0.022968	482	1
CPED1	6	0.016836	0.022978	483	1
TMEM109	6	0.016856	0.023004	484	1
PMS1	6	0.016898	0.023044	485	1
HRSP12	6	0.017018	0.023178	486	2
USP43	6	0.017089	0.023251	487	1
ULBP3	6	0.017136	0.023295	488	1
MAPKAPK2	6	0.017147	0.023305	489	1
CNGB1	6	0.017293	0.023451	490	1
MIR154	4	0.017322	0.023481	491	1
MS4A7	6	0.017395	0.023548	492	1
ANKRD13B	6	0.017479	0.023627	493	1
CPSF3L	6	0.017496	0.023637	494	2
MIR106a	4	0.017533	0.023668	495	1
FUCA2	6	0.017592	0.023733	496	2
GPR142	6	0.017596	0.023738	497	1
PPP1CA	6	0.017602	0.023743	498	1
DAGLB	6	0.017665	0.023811	499	2
KIFAP3	6	0.017674	0.02382	500	1
PCSK1N	6	0.017695	0.023841	501	1
PRRG4	6	0.017698	0.023844	502	1
MPHOSPH6	6	0.017741	0.023882	503	1
AP3S1	6	0.017974	0.024093	504	1
APBB1	6	0.017984	0.024101	505	1
WDR92	6	0.018061	0.024185	506	1
C11orf31	6	0.018067	0.024192	507	1
SLC16A13	6	0.018114	0.024244	508	1
HIF1AN	6	0.018254	0.024385	509	1
UTP11L	6	0.018263	0.024393	510	1
GMNC	6	0.018272	0.024402	511	1
INTS4	6	0.0183	0.024432	512	1
CYTH3	6	0.018414	0.024557	513	1
FUBP3	6	0.018692	0.024811	514	2
KTN1	6	0.018696	0.024814	515	1
GPR3	6	0.018697	0.024818	516	1
S100A1	6	0.018719	0.024846	517	1
KIF4B	6	0.018828	0.02496	518	2
CCDC104	6	0.018853	0.024984	519	2
KIFC1	6	0.0189	0.025029	520	1
MS4A5	6	0.018906	0.025035	521	1
ATP6V0D2	6	0.018977	0.025101	522	2
CC2D2B	6	0.019007	0.025126	523	1
MIR3682	4	0.019026	0.02514	524	1
CMSS1	6	0.019152	0.025269	525	1
RSPH10B2	6	0.019185	0.025305	526	1
MIR4788	4	0.019246	0.025365	527	1
PDIK1L	6	0.019278	0.025391	528	1
TFR2	6	0.019371	0.02549	529	1
PIAS4	6	0.019379	0.025499	530	1
NKAIN3	6	0.01941	0.025535	531	1
EXTL2	6	0.019455	0.02558	532	1
C7orf57	6	0.019557	0.025681	533	1
PTPN1	6	0.019565	0.02569	534	1
PMPCB	6	0.019592	0.02572	535	1
SEC24A	6	0.01965	0.025778	536	1
CRYGN	6	0.019697	0.025811	537	1
CCDC67	6	0.019784	0.025902	538	1
SLC43A2	6	0.019837	0.025959	539	1
KEAP1	6	0.019841	0.025963	540	1
ARNTL	6	0.019873	0.025997	541	1
ARID1B	6	0.01993	0.026062	542	1
MIR215	4	0.019936	0.026069	543	1
C6orf226	6	0.019998	0.026131	544	1
CEP89	6	0.020002	0.026135	545	1
MIR4312	4	0.020016	0.026157	546	1
TRIM32	6	0.020127	0.026256	547	2
KLF5	6	0.020162	0.026285	548	1
MAGEB17	6	0.020228	0.026362	549	1
INO80	6	0.020255	0.026389	550	1
ALDH1A1	6	0.020308	0.026442	551	1
PPP1R11	6	0.020375	0.026515	552	1
OR2L8	6	0.020383	0.026524	553	1
FIP1L1	6	0.020441	0.026589	554	1
SLC35E3	6	0.02046	0.02661	555	1
DHTKD1	6	0.020488	0.026633	556	1
IFNLR1	6	0.020562	0.026709	557	1
PDIA4	6	0.020563	0.026712	558	2
SRRM4	6	0.020593	0.026744	559	1
MIR609	4	0.020674	0.026827	560	1
OR13C5	6	0.020679	0.026832	561	1
KRBA1	6	0.020692	0.026845	562	1
BLVRA	6	0.020717	0.02687	563	1
FADD	6	0.020813	0.026965	564	1
SLC15A3	6	0.020836	0.026993	565	2
MIR4308	4	0.021054	0.027202	566	1
ARHGAP23	6	0.02106	0.027209	567	1
KRTAP10-5	6	0.021112	0.027258	568	1
SLTM	3	0.021179	0.027324	569	1
OLA1	6	0.021232	0.027365	570	1
AMELY	6	0.021242	0.027378	571	1
GPX6	6	0.02131	0.027446	572	1
MIR5687	4	0.02136	0.027497	573	1
HTR3C	6	0.021418	0.027559	574	1
ADRA1A	6	0.021433	0.027568	575	1
EIF3G	6	0.021464	0.027601	576	1
PSMG1	6	0.021484	0.027616	577	1
C19orf81	6	0.021542	0.027675	578	1
MIR194-1	4	0.021588	0.027718	579	1
UBC	6	0.021588	0.027718	580	1
SAPCD1	6	0.02165	0.027785	581	1
OR2G2	6	0.021793	0.027917	582	1
RUSC1	6	0.021837	0.02796	583	1
CREB3L4	6	0.02185	0.027972	584	1
BRPF3	6	0.021882	0.027999	585	1
HOXD13	6	0.021918	0.028036	586	1
ANTXR1	6	0.021965	0.028091	587	1
SC5D	6	0.022005	0.028138	588	1
TMPO	6	0.022086	0.028227	589	1
SSMEM1	6	0.022102	0.028245	590	1
METTL3	6	0.022138	0.028278	591	1
SHROOM2	6	0.022141	0.028279	592	2
ITGB7	6	0.022287	0.028427	593	1
TMEM251	6	0.022347	0.028498	594	1
IL2RG	6	0.02237	0.028515	595	2
RUSC2	6	0.022391	0.028542	596	1
STK31	6	0.022473	0.028625	597	1
LCE3E	6	0.022625	0.028771	598	1
CRYL1	6	0.022811	0.028926	599	1
TNKS	6	0.022854	0.028968	600	1
KCNA3	6	0.022905	0.029008	601	1
AKR1A1	6	0.022925	0.029024	602	1
PRDX3	6	0.023022	0.029112	603	1
IDE	6	0.023049	0.029133	604	1
LYZL6	6	0.023085	0.029169	605	1
KLHL40	6	0.023091	0.029174	606	1
MIR562	4	0.023136	0.029209	607	1
RASGEF1A	6	0.023276	0.029324	608	1
PCSK9	6	0.023471	0.029498	609	1
MIR4509-1	4	0.023508	0.029537	610	1
PXDNL	5	0.02367	0.029669	611	1
CABP5	6	0.023708	0.029703	612	1
DIAPH3	6	0.023888	0.029865	613	1
CANT1	6	0.024012	0.029977	614	1
LILRA2	6	0.024018	0.02998	615	1
MIR3609	4	0.024064	0.030019	616	1
ASTN2	6	0.024111	0.030074	617	1
SLC22A13	6	0.024319	0.030242	618	1
FAM115A	6	0.024387	0.0303	619	1
KCTD1	6	0.024482	0.030387	620	1
SPINK13	6	0.024511	0.03041	621	1
PVRL2	6	0.02455	0.030445	622	1
YBX3	6	0.02459	0.03048	623	1
SFT2D1	6	0.024634	0.030516	624	1
MGST3	6	0.024667	0.030542	625	1
NR1H2	6	0.024696	0.030571	626	1
SNX10	6	0.024714	0.030588	627	1
OR2A4	6	0.024726	0.030598	628	1
DCAF4L2	6	0.02485	0.030709	629	1
MCRS1	6	0.024899	0.030758	630	1
KLHL32	6	0.02513	0.030969	631	1
CACNA1D	6	0.025251	0.031084	632	1
CHDC2	6	0.02527	0.031101	633	1
ABCA13	6	0.025423	0.031234	634	1
PEX11A	6	0.025456	0.031266	635	1
SLC2A3	6	0.025533	0.03133	636	1
GIN1	6	0.025557	0.031355	637	2
ACAD10	6	0.02556	0.031359	638	1
GPR107	6	0.025683	0.031473	639	1
FANCD2	6	0.025806	0.031589	640	1
MIR7974	4	0.025812	0.031593	641	1
SLC25A6_X	6	0.025816	0.031595	642	2
SMARCAL1	6	0.025859	0.031632	643	1
CEP192	6	0.025873	0.031646	644	1
GRXCR2	6	0.026053	0.031801	645	1
EFNB1	6	0.02609	0.031837	646	1
SCRN3	6	0.026238	0.031977	647	1
MIR147b	4	0.026243	0.031982	648	1
C6orf201	6	0.026278	0.032014	649	1
ZC3HAV1L	6	0.02629	0.032021	650	1
UTP6	6	0.026336	0.032067	651	1
FOXP4	6	0.026474	0.032195	652	1
SNRNP27	6	0.026523	0.032238	653	1
SERPINA11	6	0.026526	0.03224	654	1
NTN5	6	0.02666	0.032358	655	1
LGALS1	6	0.026705	0.032395	656	1
RAB10	6	0.026753	0.03244	657	1
ANGPTL4	6	0.026799	0.032484	658	1
HOXD10	6	0.026859	0.032539	659	1
OAZ3	6	0.026936	0.032605	660	1
OR2L2	6	0.026938	0.032607	661	1
C7orf60	6	0.026977	0.032649	662	1
ZNF727	6	0.027039	0.032706	663	1
PTGES3L-AARSD1	6	0.027042	0.032708	664	1
LYRM1	6	0.027105	0.032769	665	1
NR2F2	6	0.027123	0.032784	666	1
FILIP1L	6	0.027208	0.032857	667	1
MIR518e	4	0.027215	0.032865	668	1
GRK5	6	0.027531	0.033156	669	1
NFKBIE	6	0.02754	0.033164	670	1
RNF125	6	0.027749	0.033369	671	1
CPNE8	3	0.027781	0.0334	672	1
SYPL1	6	0.027817	0.03343	673	1
MIR592	3	0.027828	0.03344	674	1
MAML3	6	0.028003	0.033584	675	1
STH	6	0.028014	0.033595	676	1
DCAF11	6	0.028024	0.033606	677	1
EXTL1	6	0.028049	0.033633	678	1
SDHAF2	6	0.028095	0.033672	679	1
DNAJC10	6	0.028141	0.033718	680	1
RBM33	6	0.028142	0.033719	681	1
DGUOK	6	0.028147	0.033722	682	1
NMNAT3	6	0.028165	0.033743	683	1
GAPDH	6	0.028231	0.033806	684	1
LTBP2	6	0.028234	0.033808	685	1
SYNCRIP	6	0.028293	0.033852	686	1
MEP1A	6	0.028393	0.033945	687	1
ATP1A1	6	0.028465	0.034019	688	1
ACSBG1	6	0.02851	0.034067	689	1
EFCAB9	6	0.028511	0.034068	690	1
SH3GL3	6	0.028577	0.03414	691	1
SF3B1	6	0.028755	0.03431	692	1
C17orf50	6	0.028789	0.034338	693	1
ABHD16B	6	0.028824	0.034368	694	1
ADAMTSL5	6	0.028835	0.034377	695	1
FAM175B	6	0.028854	0.034392	696	2
SIGLEC9	6	0.028885	0.034417	697	1
TCEB3	6	0.028928	0.034452	698	1
CCL3L1	6	0.028933	0.034459	699	1
MIR526b	4	0.029006	0.034541	700	1
LRPAP1	6	0.029019	0.034553	701	1
OXSR1	6	0.029087	0.034616	702	1
ARL4C	6	0.029131	0.034647	703	1
SUPT4H1	6	0.029191	0.034701	704	1
OR6F1	6	0.029192	0.034703	705	1
OR2S2	6	0.029222	0.03473	706	1
C3orf37	6	0.02924	0.034742	707	1
RAC1	6	0.029254	0.034756	708	1
ZNF524	6	0.029295	0.034791	709	1
AHCYL1	6	0.029315	0.034808	710	1
CRYGB	6	0.029344	0.034829	711	1
PSAT1	6	0.02939	0.03487	712	1
RPL26	6	0.029393	0.034872	713	1
DHH	6	0.029436	0.034904	714	1
CCDC103	6	0.02947	0.034936	715	1
LGR5	6	0.029501	0.03496	716	1
SPANXN1	6	0.02951	0.034964	717	1
C10orf131	5	0.029541	0.034991	718	1
IL22RA1	6	0.029561	0.035008	719	1
KIAA1551	6	0.029563	0.035009	720	1
RGS1	6	0.029571	0.035017	721	1
ADAM20	6	0.029621	0.035064	722	1
POMP	6	0.029623	0.035065	723	1
PCDH10	6	0.029624	0.035067	724	1
DNAJB9	6	0.029625	0.035068	725	1
CLUL1	6	0.029793	0.03522	726	1
SLC14A2	6	0.029806	0.035231	727	1
PNMA1	6	0.030037	0.035436	728	1
CEP128	6	0.030053	0.035453	729	1
PBX4	6	0.030084	0.03548	730	1
MRPL30	6	0.030161	0.035557	731	1
GANAB	6	0.03036	0.03574	732	1
CAMSAP3	6	0.03036	0.03574	733	1
ANKRD11	6	0.030422	0.035789	734	1
MIR151a	4	0.03043	0.035796	735	1
SPATA31D3	6	0.030468	0.035831	736	1
RMI2	6	0.030483	0.035842	737	1
MIR4740	4	0.030492	0.03585	738	1
MKL1	6	0.030606	0.035964	739	1
HOMEZ	6	0.03079	0.036129	740	1
MIR5047	4	0.030801	0.036138	741	1
EQTN	6	0.030863	0.0362	742	1
ELL3	6	0.031007	0.036333	743	1
ZNF43	6	0.031036	0.036361	744	1
PIK3C3	6	0.031042	0.036366	745	1
APOA1BP	6	0.031053	0.036378	746	1
FAU	6	0.031099	0.036425	747	1
BGN	6	0.031159	0.036479	748	1
NFATC1	6	0.031238	0.036556	749	1
VCP	6	0.03133	0.036631	750	1
PPP1R7	6	0.03142	0.036726	751	1
C22orf43	6	0.031466	0.036766	752	1
COX4I1	6	0.031469	0.036767	753	1
GJB5	6	0.031544	0.036838	754	1
DCAF6	6	0.031607	0.036888	755	1
LOXL3	6	0.031637	0.036913	756	1
ACRV1	6	0.031711	0.036973	757	1
CD86	6	0.031726	0.036989	758	1
AKT3	6	0.03173	0.036992	759	1
ENOX1	6	0.031836	0.037086	760	1
TPP2	6	0.031915	0.037155	761	1
CRYZL1	6	0.032022	0.03725	762	1
ZNF101	6	0.032161	0.037382	763	1
NDUFA4L2	6	0.032197	0.037421	764	1
CIR1	6	0.032202	0.037425	765	1
MIR323b	4	0.032253	0.037478	766	1
ZBTB7C	6	0.032263	0.037487	767	1
NPRL3	6	0.032386	0.037607	768	1
S100B	6	0.032391	0.037613	769	1
C17orf98	6	0.032418	0.037639	770	1
RIPK4	6	0.032447	0.037669	771	1
ENKD1	6	0.032496	0.037708	772	1
MIR4778	4	0.03253	0.03774	773	1
SLC25A15	6	0.03257	0.037776	774	1
ALDH3A1	6	0.032602	0.037804	775	1
FERMT2	6	0.032622	0.037823	776	1
ZC3H10	6	0.032626	0.037828	777	1
DDX19B	6	0.032853	0.038045	778	1
MIR1285-2	4	0.032905	0.038098	779	1
MIR203b	4	0.032952	0.038144	780	1
MIR649	4	0.032997	0.038184	781	1
ICMT	6	0.033071	0.038248	782	1
ST6GALNAC4	6	0.033245	0.038398	783	1
KIAA0355	6	0.033268	0.038418	784	1
CBR4	6	0.033301	0.038455	785	1
FAM57A	6	0.033406	0.038549	786	1
PCBP4	6	0.033544	0.038673	787	1
UGT2B28	6	0.033581	0.03871	788	1
DNAJB7	6	0.033615	0.038742	789	1
CETN3	6	0.033682	0.038812	790	1
ATOX1	6	0.03376	0.038874	791	1
CHMP4B	6	0.033769	0.038883	792	1
ZNF514	6	0.03377	0.038883	793	1
CYTH4	6	0.033794	0.038904	794	1
GPR173	6	0.033867	0.038971	795	1
ZDHHC1	6	0.033894	0.038992	796	1
OR5M10	6	0.033918	0.039017	797	1
CYP46A1	6	0.034142	0.039223	798	1
PDHX	6	0.034172	0.039247	799	1
CP	6	0.034256	0.039317	800	1
WDR61	6	0.034295	0.039352	801	1
MLKL	6	0.034382	0.039429	802	1
TMEM87B	6	0.034408	0.039453	803	1
CLDN9	6	0.03442	0.039463	804	1
OSGEP	6	0.03445	0.039487	805	1
FAT1	6	0.03447	0.039506	806	1
MMAB	6	0.034524	0.039554	807	1
MIR643	4	0.034539	0.039571	808	1
C2orf72	6	0.034696	0.039695	809	1
HNRNPD	6	0.034728	0.039724	810	1
GLB1	6	0.034776	0.039762	811	1
MIR4663	4	0.034807	0.039784	812	1
STRIP2	6	0.03483	0.039808	813	1
DPF2	6	0.034851	0.039823	814	1
KRTAP2-2	6	0.034917	0.039876	815	1
OPN4	6	0.035021	0.039978	816	1
RTL1	6	0.035064	0.040013	817	1
SPATA31D4	6	0.035129	0.040062	818	1
KIF9	6	0.035157	0.040085	819	1
HCST	6	0.035212	0.04013	820	1
OAZ2	6	0.035222	0.040139	821	1
MROH8	6	0.035288	0.040195	822	1
IPMK	6	0.035376	0.040275	823	1
C15orf60	6	0.035479	0.040364	824	1
GALNTL6	6	0.0355	0.040376	825	1
KIAA1456	6	0.035592	0.040459	826	1
HEPACAM2	6	0.03567	0.040525	827	1
RGPD2	6	0.035747	0.040574	828	1
MARK2	6	0.035808	0.040629	829	1
GNB4	6	0.035816	0.040637	830	1
SGCG	6	0.035939	0.040739	831	1
FRYL	6	0.036061	0.040849	832	1
CDC25C	6	0.036128	0.040903	833	1
MIR493	4	0.036244	0.041002	834	1
TMEM67	6	0.036306	0.041049	835	1
ZNF428	6	0.036333	0.041073	836	1
PWP2	6	0.036347	0.041088	837	1
POLR2K	6	0.036537	0.04126	838	1
SLC25A3	6	0.036567	0.041286	839	1
UBE2D2	6	0.036583	0.041301	840	1
CLDN2	6	0.036585	0.041303	841	1
RASGRP2	6	0.036611	0.041321	842	1
MIR4761	4	0.036703	0.041387	843	1
SOX12	6	0.036721	0.041405	844	1
P4HTM	6	0.036734	0.041418	845	1
PRPH	6	0.036856	0.04153	846	1
APEX2	6	0.036913	0.04157	847	1
MIR4727	4	0.036928	0.041588	848	1
CYP4F22	6	0.03695	0.041606	849	1
WDR74	6	0.037133	0.041763	850	1
GLG1	6	0.037197	0.041823	851	1
TSPAN19	6	0.037227	0.041852	852	1
ZNF30	6	0.037273	0.041887	853	1
PLOD1	6	0.037382	0.041992	854	1
SERPINA7	6	0.037406	0.042016	855	1
MIR4451	4	0.037505	0.0421	856	1
SEC31A	6	0.037528	0.042123	857	1
ATG3	6	0.037541	0.042136	858	1
ADAMTS10	6	0.037595	0.042183	859	1
CMTM7	6	0.037598	0.042185	860	1
HIST1H3C	6	0.03765	0.042231	861	1
ZNF326	6	0.037687	0.042267	862	1
BRD7	6	0.037777	0.042358	863	1
ADCYAP1	6	0.03787	0.04245	864	1
ZNF570	6	0.037894	0.042475	865	1
DEFB112	6	0.037916	0.042495	866	1
ARHGEF35	6	0.037982	0.042562	867	1
PFKFB3	6	0.038029	0.042611	868	1
OPN1LW	6	0.038034	0.042616	869	1
EIF2AK1	6	0.0381	0.042683	870	1
VTA1	6	0.038184	0.042755	871	1
DOLPP1	6	0.038186	0.042757	872	1
BCAR3	6	0.038322	0.042879	873	1
RNF224	6	0.038376	0.042929	874	1
OSTC	6	0.038505	0.043033	875	1
PRSS3	6	0.038605	0.043124	876	1
OXLD1	6	0.038688	0.0432	877	1
HNRNPR	6	0.038719	0.043229	878	1
TSC2	6	0.038789	0.043291	879	1
LSS	6	0.038881	0.043379	880	1
ZSCAN2	6	0.038973	0.043457	881	1
TEX11	6	0.039082	0.04356	882	1
SIX1	6	0.039176	0.043646	883	1
SERPINB1	6	0.039252	0.043713	884	1
CHST9	6	0.039386	0.043836	885	1
ABCA8	6	0.03942	0.043867	886	1
SLC30A6	6	0.039443	0.043884	887	1
SLIT1	6	0.039557	0.043984	888	1
OC90	6	0.03957	0.043998	889	1
PDIA3	6	0.039601	0.044028	890	1
RPUSD1	6	0.039616	0.044039	891	1
KRTAP4-7	6	0.039662	0.044077	892	1
KRTAP10-2	6	0.039664	0.04408	893	1
CEP78	6	0.039725	0.044145	894	1
SLC26A2	6	0.039786	0.044201	895	1
KHDRBS2	6	0.039848	0.044253	896	1
GNGT1	6	0.039908	0.044302	897	1
GMCL1	6	0.039937	0.044323	898	1
PTPDC1	6	0.040072	0.044441	899	1
DSC2	6	0.04012	0.044481	900	1
MIR4482	4	0.040212	0.044561	901	1
KCNMA1	6	0.040213	0.044561	902	1
AVIL	6	0.040241	0.04458	903	1
SLC24A1	6	0.04034	0.044663	904	1
RHBDL3	6	0.040396	0.044717	905	1
MIR4276	4	0.040402	0.044722	906	1
CSB-PGBD3	6	0.040518	0.044814	907	1
CSRP2	6	0.040579	0.044867	908	1
MIR4421	4	0.040618	0.044898	909	1
USP4	6	0.040625	0.044906	910	1
RBBP6	6	0.04064	0.044917	911	1
GPR112	6	0.040717	0.044991	912	1
GRIK1	6	0.040764	0.045038	913	1
EIF3E	6	0.040802	0.045076	914	1
DUSP4	6	0.0409	0.045152	915	1
TSNAX	6	0.040925	0.045172	916	1
KIAA2022	6	0.040946	0.045188	917	1
TMEM180	6	0.040956	0.045196	918	1
TRIM27	6	0.041102	0.045319	919	1
ATP6V1F	6	0.041175	0.045375	920	1
ACTL6A	6	0.041229	0.045424	921	1
C2orf27B	6	0.041267	0.045455	922	1
LOC100506422	6	0.04131	0.045495	923	1
CCL28	6	0.041371	0.045547	924	1
MYOD1	6	0.041405	0.045574	925	1
WASF1	6	0.041449	0.045612	926	1
GPBP1L1	6	0.04148	0.045643	927	1
C2orf78	6	0.041588	0.045742	928	1
NMT1	6	0.041609	0.045759	929	1
MIR30d	4	0.041754	0.04588	930	1
CRHR2	6	0.041756	0.045882	931	1
RIPK2	6	0.041787	0.045911	932	1
MLIP	6	0.041837	0.045956	933	1
TAF1D	6	0.041858	0.045977	934	1
C7orf66	6	0.041909	0.046023	935	1
LGALS8	6	0.041941	0.046057	936	1
SOCS1	6	0.04198	0.046095	937	1
VPS51	6	0.042102	0.0462	938	1
C14orf182	6	0.042131	0.046232	939	1
PANX2	6	0.042141	0.046241	940	1
BCL9	6	0.042163	0.046259	941	1
TAAR2	6	0.042223	0.046308	942	1
POMT2	6	0.042229	0.04631	943	1
STK35	6	0.042321	0.046382	944	1
UHRF1	6	0.042369	0.046424	945	1
ARHGAP33	6	0.042445	0.046484	946	1
ZDHHC3	6	0.04252	0.046556	947	1
RBM18	6	0.042587	0.046604	948	1
C10orf105	6	0.042642	0.046663	949	1
PRM3	6	0.04274	0.046757	950	1
MRE11A	6	0.042741	0.046758	951	1
HSPB6	6	0.042779	0.046795	952	1
G3BP1	6	0.042825	0.046827	953	1
C2orf47	6	0.042832	0.046834	954	1
HADHA	6	0.042871	0.046871	955	1
SMO	6	0.042976	0.046969	956	1
FEZF2	6	0.043052	0.047042	957	1
NHP2L1	6	0.043058	0.047047	958	1
HLA-DOB	6	0.043203	0.047178	959	1
HOXB5	6	0.043319	0.047287	960	1
TRIM11	6	0.043379	0.047352	961	1
LEPROTL1	6	0.04342	0.047391	962	1
UNC5D	6	0.04353	0.047486	963	1
OR5H2	6	0.043623	0.047562	964	1
C6orf7	6	0.043744	0.047681	965	1
SERPINE3	6	0.043805	0.047751	966	1
ZNF492	6	0.043817	0.047765	967	1
GEMIN4	6	0.043866	0.047806	968	1
STRBP	6	0.043962	0.047891	969	1
LHFPL3	6	0.044064	0.047971	970	1
GREM2	6	0.044231	0.048115	971	1
PNMAL2	6	0.044341	0.048214	972	1
C22orf46	6	0.044401	0.048267	973	1
MANSC1	6	0.044473	0.048331	974	1
SMPDL3A	6	0.044534	0.048382	975	1
GTDC1	6	0.044616	0.04847	976	1
MIR6715a	4	0.044717	0.048565	977	1
TWF2	6	0.04477	0.048607	978	1
AMBN	6	0.044838	0.048675	979	1
CUL2	6	0.044884	0.048717	980	1
TNRC18	6	0.04493	0.048759	981	1
OR8K1	6	0.044947	0.04877	982	1
ABCC2	6	0.04496	0.048779	983	1
CRYBB2	6	0.045023	0.048835	984	1
MRPL32	6	0.045081	0.04889	985	1
ZNF76	6	0.045108	0.048918	986	1
LIN7B	6	0.045159	0.048972	987	1
MIR6783	4	0.045196	0.049006	988	1
STX11	6	0.045203	0.049011	989	1
OR10G3	6	0.04525	0.049059	990	1
RCN1	6	0.045342	0.049142	991	1
CPZ	6	0.045384	0.049176	992	1
EOGT	6	0.045433	0.049213	993	1
C20orf26	6	0.045445	0.04922	994	1
NLRP8	6	0.045524	0.049289	995	1
GFRA2	6	0.04557	0.049328	996	1
ZNF816-ZNF321P	6	0.045573	0.049329	997	1
MIR548s	4	0.04563	0.049371	998	1
PTRHD1	6	0.045662	0.049402	999	1
PARVG	6	0.045749	0.049489	1000	1
RSL1D1	6	0.045753	0.049491	1001	1
SEPT11	6	0.04578	0.049514	1002	1
TM4SF19	6	0.04581	0.049537	1003	1
ATP6V0E2	6	0.045814	0.049539	1004	1
MGAM	6	0.04587	0.049597	1005	1
NOX5	6	0.045875	0.049599	1006	1
MIR3529	4	0.045919	0.049638	1007	1
KIAA1210	6	0.045931	0.049656	1008	1
TXNIP	6	0.045937	0.049661	1009	1
CDHR3	6	0.046007	0.049722	1010	1
OR5L2	6	0.046158	0.049856	1011	1
MIPOL1	6	0.046244	0.04994	1012	1
ARL4A	6	0.046356	0.050045	1013	1
MIR1283-1	4	0.046367	0.050056	1014	1
ESCO2	6	0.046393	0.050086	1015	1
WDR93	6	0.046417	0.05011	1016	1
CTDNEP1	6	0.046438	0.050131	1017	1
SLC25A44	6	0.046484	0.050171	1018	1
GALNTL5	6	0.046659	0.050338	1019	1
FAM153B	6	0.046674	0.050353	1020	1
CPN1	6	0.046763	0.050425	1021	1
B3GNT8	6	0.046804	0.050457	1022	1
SP2	6	0.046888	0.050526	1023	1
MMP20	6	0.046981	0.050606	1024	1
OPRL1	6	0.047032	0.050648	1025	1
C14orf177	6	0.047195	0.050783	1026	1
RAB18	6	0.047326	0.050896	1027	1
PSMA3	6	0.047349	0.050914	1028	1
SLC35G2	6	0.047397	0.050959	1029	1
NRK	6	0.047444	0.051005	1030	1
DOCK8	6	0.047533	0.051085	1031	1
MAGEA6	6	0.047626	0.051159	1032	1
GSTK1	6	0.047629	0.051163	1033	1
SNRPB2	6	0.047751	0.051274	1034	1
CITED2	6	0.047763	0.051283	1035	1
TLCD1	6	0.047899	0.051417	1036	1
ACOT2	6	0.047932	0.051452	1037	1
ASCL1	6	0.047962	0.051475	1038	1
TSSK1B	6	0.047973	0.051489	1039	1
CA13	6	0.048114	0.051616	1040	1
SLC27A4	6	0.048175	0.051676	1041	1
PQLC1	6	0.0482	0.051694	1042	1
CD3G	6	0.048219	0.051712	1043	1
DEAF1	6	0.048235	0.051725	1044	1
MIR6868	4	0.048238	0.051726	1045	1
NDUFAF1	6	0.048351	0.051844	1046	1
DUSP22	6	0.048356	0.051847	1047	1
TTC9C	6	0.048584	0.052047	1048	1
KDM4D	6	0.048599	0.052061	1049	1
EIF4EBP3	6	0.048653	0.052109	1050	1
SKP1	6	0.048698	0.052161	1051	1
HOXB13	6	0.048766	0.052219	1052	1
ZNF655	6	0.04878	0.052232	1053	1
ZYG11A	6	0.04878	0.052232	1054	1
MME	6	0.048821	0.052266	1055	1
FIGN	6	0.048902	0.052336	1056	1
IFNA14	6	0.048955	0.052386	1057	1
MIR4313	4	0.048974	0.0524	1058	1
UBE2V2	6	0.048994	0.052419	1059	1
SCO2	6	0.049005	0.052428	1060	1
ABCC1	6	0.049023	0.052444	1061	1
ZNF346	6	0.049088	0.052506	1062	1
MIR6835	2	0.049094	0.052509	1063	1
PURG	6	0.049177	0.052571	1064	1
MIR4662a	4	0.049204	0.0526	1065	1
LOC643355	6	0.049265	0.052661	1066	1
MIR3151	4	0.04933	0.052714	1067	1
MIXL1	6	0.049342	0.052727	1068	1
PPP1R14A	6	0.049446	0.052818	1069	1
GLE1	6	0.049541	0.052913	1070	1
FGFBP3	6	0.049557	0.052929	1071	1
MROH7	6	0.049567	0.052938	1072	1
PPAT	6	0.049587	0.052956	1073	1
METTL21D	6	0.04971	0.053059	1074	1
HOXD8	6	0.049724	0.053076	1075	1
GTF2H2C	6	0.049738	0.053086	1076	1
MTCH1	6	0.049749	0.053095	1077	1
RAD17	6	0.049771	0.05311	1078	1
QKI	6	0.049785	0.05312	1079	1
LOC100130370	6	0.049811	0.053141	1080	1
GPRC5A	6	0.049832	0.053158	1081	1
MAN2A1	6	0.049955	0.05327	1082	1
C1orf87	6	0.050043	0.05335	1083	1
RNF6	6	0.050051	0.053358	1084	1
CYP4F8	6	0.050169	0.053448	1085	1
IFI44L	6	0.050293	0.053571	1086	1
MIR4803	4	0.050453	0.05372	1087	1
SPOCK1	6	0.050506	0.053769	1088	1
C9orf69	6	0.050544	0.053801	1089	1
RRP1B	6	0.05068	0.053933	1090	1
PRX	6	0.050717	0.053971	1091	1
MAMSTR	6	0.050772	0.054011	1092	1
ANKRD52	6	0.050841	0.05407	1093	1
ODF3	6	0.050898	0.054125	1094	1
SPATA21	6	0.050916	0.05414	1095	1
APOC3	6	0.051067	0.054264	1096	1
PAQR5	6	0.051079	0.054274	1097	1
TLE3	6	0.051181	0.05436	1098	1
CDKL2	6	0.051211	0.054389	1099	1
DSCR3	6	0.051231	0.054406	1100	0
TYSND1	6	0.051261	0.054429	1101	1
MIR5011	4	0.051272	0.054438	1102	1
CDK6	6	0.051318	0.054479	1103	1
DNALI1	6	0.051321	0.054481	1104	1
SNX11	6	0.051442	0.054588	1105	1
MIR4687	4	0.051454	0.054599	1106	1
MKX	6	0.051546	0.054674	1107	1
SLC35G5	6	0.051591	0.054718	1108	1
DNMT1	6	0.051594	0.054722	1109	1
LPIN1	6	0.051684	0.05479	1110	1
GMPR	6	0.051773	0.054873	1111	1
DBT	6	0.051805	0.054902	1112	1
MEF2BNB	6	0.051884	0.054976	1113	1
NANOS2	6	0.051971	0.055054	1114	1
CPB1	6	0.051976	0.055059	1115	1
VWA8	6	0.051986	0.055064	1116	1
PGM3	6	0.052046	0.055119	1117	1
CXCL13	6	0.052046	0.055119	1118	1
SRGAP2	6	0.052065	0.055137	1119	0
MYO1A	6	0.052068	0.055141	1120	1
COX20	6	0.052137	0.055196	1121	1
MIR5579	4	0.052183	0.05523	1122	1
OR8H2	6	0.05219	0.05524	1123	1
HIST1H4C	6	0.052252	0.055292	1124	1
TRMT44	6	0.052288	0.055325	1125	1
MIR6856	4	0.05241	0.055425	1126	0
MIR5007	4	0.052435	0.05545	1127	1
POLI	6	0.052456	0.055467	1128	1
IL17RC	6	0.052547	0.055544	1129	1
VDAC3	6	0.052599	0.055596	1130	0
PHYHD1	6	0.052648	0.055638	1131	1
NAB1	6	0.052729	0.055703	1132	1
MIR1284	4	0.052741	0.055709	1133	1
SSX7	6	0.052771	0.055739	1134	1
FAM78B	6	0.053012	0.05595	1135	1
XPA	6	0.053047	0.055972	1136	1
SEP15	6	0.053073	0.055995	1137	1
GAL	6	0.053092	0.056011	1138	1
FNDC3B	6	0.053169	0.056085	1139	1
WASL	6	0.053193	0.056111	1140	1
BAZ2B	6	0.0532	0.056114	1141	1
SNRPF	6	0.053292	0.056195	1142	1
CEP112	6	0.053325	0.056226	1143	1
CGRRF1	6	0.053365	0.056264	1144	1
MUC7	6	0.053435	0.056325	1145	1
MIR5582	2	0.053589	0.056465	1146	0
TLN1	6	0.053638	0.056515	1147	1
ING3	6	0.053668	0.056542	1148	0
CACUL1	6	0.053736	0.056595	1149	1
SLCO3A1	6	0.053865	0.056705	1150	1
TNS3	6	0.053978	0.056796	1151	1
CELF1	6	0.054077	0.056891	1152	1
ZFAND2A	6	0.054092	0.056902	1153	1
GYS2	6	0.054117	0.056922	1154	1
INTS5	6	0.054139	0.056946	1155	0
CYP21A2	6	0.054183	0.056992	1156	1
UCP2	6	0.054229	0.05703	1157	1
MIR552	4	0.054234	0.057035	1158	0
DNAJC14	6	0.05427	0.057065	1159	1
MAFA	6	0.054274	0.05707	1160	1
ZNF248	6	0.054279	0.057074	1161	1
STK33	6	0.05446	0.057252	1162	1
C8orf47	6	0.054576	0.057349	1163	1
PKNOX1	6	0.054607	0.057377	1164	1
NFATC2	6	0.054637	0.05741	1165	1
PDE10A	6	0.054698	0.057469	1166	1
RPS6KA5	6	0.054701	0.057471	1167	1
PRNP	6	0.054774	0.057548	1168	1
PIEZO1	6	0.054784	0.057557	1169	0
SH2D4A	6	0.054864	0.057627	1170	1
DUSP27	6	0.054894	0.057656	1171	0
PPARGC1A	6	0.054904	0.057667	1172	1
ADAMTSL2	6	0.054942	0.057701	1173	1
TIMM44	6	0.054972	0.057725	1174	0
BPIFC	6	0.055001	0.057746	1175	1
MIR4732	4	0.055098	0.057833	1176	0
C17orf96	6	0.055137	0.057878	1177	1
OR8J1	6	0.055187	0.057924	1178	1
RBM45	6	0.055228	0.057961	1179	1
BCL7A	6	0.055279	0.058008	1180	1
LIPK	6	0.055304	0.058032	1181	1
PLA2G4E	6	0.055319	0.058045	1182	1
ACVR2A	6	0.055409	0.058128	1183	1
DUS2L	6	0.055455	0.058169	1184	1
HCAR3	6	0.0555	0.058209	1185	1
DNTTIP2	6	0.055522	0.058232	1186	0
ACRC	5	0.055584	0.058295	1187	1
TMEM9	6	0.055676	0.058378	1188	1
RIPK1	6	0.055707	0.058406	1189	1
MAP4K1	6	0.055966	0.058637	1190	1
PRAMEF4	6	0.056147	0.058785	1191	1
MIR3941	4	0.056165	0.058799	1192	1
CA4	6	0.05623	0.058853	1193	0
TNFSF11	6	0.056267	0.058886	1194	1
HS3ST2	6	0.056287	0.058902	1195	1
A2M	6	0.056327	0.058933	1196	1
MIR4497	4	0.05634	0.058947	1197	0
GRM4	6	0.056388	0.058977	1198	1
IL34	6	0.056408	0.058992	1199	1
OR2AK2	6	0.056453	0.059029	1200	1
WT1	6	0.056528	0.059098	1201	0
EXOC2	6	0.056555	0.059123	1202	1
IBA57	6	0.056568	0.059134	1203	1
KCNG2	6	0.05677	0.059311	1204	1
NDRG4	6	0.056775	0.059314	1205	1
RPS6KA3	6	0.05678	0.059318	1206	1
MCF2	6	0.056809	0.05934	1207	1
MIR548aa-1	4	0.056952	0.059466	1208	1
DSCR6	6	0.056989	0.059503	1209	1
PPA2	6	0.057043	0.059555	1210	1
NCKAP1L	6	0.05705	0.059561	1211	1
MAP2K6	6	0.057179	0.059683	1212	1
SLC9A9	6	0.057224	0.059729	1213	1
MRI1	6	0.05723	0.059738	1214	1
KIAA1033	6	0.05729	0.059792	1215	1
COBLL1	6	0.057305	0.059808	1216	1
MLL3	6	0.057325	0.059821	1217	1
CLEC1B	6	0.05735	0.059847	1218	1
MIR27a	4	0.05736	0.059856	1219	1
UBIAD1	6	0.05738	0.059874	1220	1
SCN2A	6	0.05741	0.059901	1221	1
TNNT3	6	0.057447	0.059942	1222	1
PRICKLE2	6	0.057455	0.059948	1223	1
ZNF618	6	0.057508	0.059997	1224	1
ALDH4A1	6	0.05753	0.060016	1225	1
SSX2B	6	0.057538	0.060021	1226	1
AOC2	6	0.057587	0.060062	1227	1
CLDN12	6	0.057647	0.060118	1228	1
DDX53	6	0.057651	0.060121	1229	1
LOC100287534	6	0.057722	0.060185	1230	1
PTGES	6	0.057768	0.060232	1231	1
SPTAN1	6	0.057771	0.060235	1232	1
AMACR	6	0.05783	0.060287	1233	1
PRR9	6	0.057904	0.060351	1234	1
EPHB2	6	0.057922	0.06037	1235	1
POLR3H	6	0.057927	0.060377	1236	0
AFF2	6	0.058012	0.060454	1237	1
PTGES3	6	0.05804	0.060478	1238	1
TBCCD1	6	0.05813	0.060562	1239	1
IK	6	0.058176	0.060611	1240	1
OR51I1	6	0.058192	0.060629	1241	1
CHN1	6	0.058266	0.0607	1242	1
FLJ44635	6	0.058357	0.060783	1243	1
LMO4	6	0.058362	0.060786	1244	1
CHRNA1	6	0.058402	0.060823	1245	1
RGS7	6	0.058414	0.060833	1246	0
COL12A1	6	0.058432	0.06085	1247	1
MYCL	6	0.058454	0.06087	1248	1
CCDC92	6	0.058484	0.060893	1249	1
ADPRHL2	6	0.058493	0.060901	1250	1
RSU1	6	0.058553	0.06095	1251	1
SLA2	6	0.058576	0.060971	1252	1
MIR4648	4	0.058613	0.060996	1253	1
IKZF3	6	0.058673	0.06106	1254	1
LCA5	6	0.058729	0.06111	1255	1
MIR6785	4	0.058792	0.061178	1256	0
CCDC148	6	0.058793	0.061179	1257	1
CDH17	6	0.058942	0.061318	1258	1
APOD	6	0.059033	0.061398	1259	1
TTC30A	6	0.059036	0.061402	1260	1
SMIM21	6	0.059103	0.061469	1261	1
PPP1R8	6	0.059153	0.061513	1262	1
SLC24A5	6	0.059213	0.061564	1263	1
TRMT12	6	0.059273	0.061624	1264	1
MIR3144	4	0.059308	0.061654	1265	1
CWH43	6	0.059353	0.061692	1266	1
CLEC2L	6	0.05943	0.061761	1267	1
ECM2	6	0.05946	0.061789	1268	1
CPNE4	6	0.059514	0.061837	1269	1
PAQR7	6	0.059521	0.061843	1270	1
CDK5R2	6	0.059634	0.061947	1271	1
TMBIM1	6	0.059643	0.061951	1272	1
RHOBTB1	6	0.059702	0.061994	1273	1
APOBEC3A	6	0.05976	0.062034	1274	1
MIR1244-1	4	0.059806	0.062079	1275	1
SCN1B	6	0.059941	0.062202	1276	1
WDR70	6	0.059948	0.062206	1277	1
OR2M3	6	0.060001	0.062251	1278	1
COL4A3BP	6	0.060032	0.062279	1279	1
GNG13	6	0.060122	0.062354	1280	1
TRMT61B	6	0.060143	0.062373	1281	0
AVL9	6	0.060253	0.06247	1282	1
RAB2B	6	0.060258	0.062477	1283	1
THEMIS2	6	0.060283	0.062497	1284	1
CCDC37	6	0.0603	0.062512	1285	1
PIAS3	6	0.060354	0.062558	1286	1
PPP2R3A	6	0.060474	0.062678	1287	1
ITIH2	6	0.060484	0.062687	1288	1
MIR3156-1	4	0.060527	0.062729	1289	1
ZNF787	6	0.060536	0.062738	1290	0
VPS37A	6	0.060594	0.062791	1291	1
MKI67	6	0.060665	0.062855	1292	1
MDM2	6	0.060678	0.062868	1293	0
CPO	6	0.060714	0.062898	1294	1
LGALS12	6	0.060823	0.062992	1295	1
VTI1A	6	0.060862	0.063026	1296	1
ARHGAP10	4	0.060882	0.063037	1297	0
TRIM45	6	0.060892	0.063048	1298	1
PRR5	6	0.060954	0.063109	1299	1
PTX3	6	0.061024	0.06317	1300	0
CARM1	6	0.061072	0.063217	1301	1
NWD1	6	0.061194	0.063323	1302	1
SMAGP	6	0.061212	0.063337	1303	0
CNBD1	6	0.061253	0.063379	1304	1
MARS	6	0.061254	0.06338	1305	1
GJC2	6	0.061349	0.063475	1306	1
PPEF1	6	0.06141	0.063525	1307	1
EPC2	6	0.061441	0.063544	1308	1
AKNA	6	0.061479	0.063582	1309	1
MIR6504	4	0.061532	0.063633	1310	1
AGPAT5	6	0.061553	0.063651	1311	1
SLC6A11	6	0.061613	0.063708	1312	1
ANKRD10	6	0.06166	0.063747	1313	1
CD9	6	0.061673	0.063759	1314	1
GAL3ST2	6	0.061705	0.063787	1315	1
MED4	6	0.061928	0.063985	1316	1
SPAST	6	0.061958	0.064013	1317	1
P2RX3	6	0.061973	0.064031	1318	1
MIR431	4	0.062112	0.06415	1319	1
TMEM218	6	0.062153	0.06418	1320	1
SOX3	6	0.062157	0.064182	1321	1
ORC3	6	0.062171	0.064197	1322	1
MIR548a-2	4	0.062232	0.064252	1323	1
RECQL4	6	0.062293	0.064307	1324	1
LOC100130539	6	0.062338	0.064344	1325	1
RFC5	6	0.062384	0.064383	1326	1
NR2C2	6	0.062392	0.064389	1327	1
AIPL1	6	0.062473	0.064461	1328	1
MAST3	6	0.062518	0.064502	1329	1
DPM1	6	0.062564	0.064537	1330	1
MIR4641	4	0.062567	0.06454	1331	1
PLD3	6	0.062572	0.064543	1332	1
IDH2	6	0.062598	0.064568	1333	1
IL32	6	0.062654	0.064618	1334	1
MIR892c	4	0.062752	0.064705	1335	1
TRMT10A	6	0.06288	0.064809	1336	1
AP2B1	6	0.062932	0.064856	1337	1
NBEA	6	0.063063	0.064976	1338	1
KIAA0368	6	0.063105	0.06501	1339	1
MIR513b	4	0.063145	0.065053	1340	1
FAH	6	0.063237	0.06513	1341	1
HSFX2	6	0.063287	0.065169	1342	0
GRAMD1A	6	0.063362	0.065234	1343	1
DLX1	6	0.06341	0.065277	1344	1
MIR602	4	0.06345	0.065313	1345	1
CTXN2	6	0.06347	0.065334	1346	1
LAMB1	6	0.063512	0.065372	1347	1
FCRLB	6	0.06353	0.065388	1348	1
ZMYM1	6	0.06359	0.065443	1349	1
ZNF609	6	0.063632	0.065479	1350	1
THSD7A	6	0.06365	0.065497	1351	1
USP14	6	0.063737	0.06557	1352	1
AGPHD1	6	0.063873	0.065672	1353	1
EFEMP2	6	0.063889	0.065685	1354	1
GSK3B	6	0.064009	0.0658	1355	1
MIR3656	4	0.064027	0.065819	1356	1
ZFAND4	6	0.064053	0.065842	1357	1
HMGA1	6	0.064128	0.065903	1358	1
HGS	6	0.064149	0.065921	1359	1
NT5C3B	6	0.064189	0.065959	1360	1
NOP9	6	0.064369	0.066125	1361	1
GSTT2B	6	0.064392	0.066146	1362	1
MIR3935	4	0.064414	0.066163	1363	1
TFEC	6	0.064427	0.066175	1364	1
EIF4H	6	0.06448	0.066221	1365	1
PAPOLG	6	0.064575	0.066304	1366	1
PFAS	6	0.064594	0.06632	1367	1
OR2A5	6	0.064607	0.066332	1368	1
FAM126B	6	0.064703	0.066408	1369	1
OR56A4	6	0.064726	0.066426	1370	1
MIR1302-6	4	0.064757	0.066448	1371	1
PFKL	6	0.064796	0.066488	1372	0
SF3B14	6	0.06482	0.06651	1373	1
UGT2B15	6	0.064846	0.066534	1374	1
ADAD2	6	0.06497	0.066644	1375	1
ISCA2	6	0.065047	0.066715	1376	0
CYP39A1	6	0.065085	0.066747	1377	1
PRAMEF8	6	0.065092	0.066752	1378	1
MCF2L2	6	0.065145	0.066797	1379	1
RBFOX3	6	0.065183	0.066834	1380	1
TUBA3D	6	0.06522	0.066872	1381	0
UBA5	6	0.065265	0.066905	1382	1
MIR223	4	0.065283	0.066925	1383	0
QRSL1	6	0.065324	0.066969	1384	1
ITGB1	6	0.065335	0.066977	1385	1
GAA	6	0.065339	0.066979	1386	1
MIR3660	3	0.065365	0.067005	1387	1
TGDS	6	0.065444	0.067081	1388	1
SUMF1	6	0.065456	0.067091	1389	1
FMO2	6	0.065541	0.067169	1390	1
CNTRL	6	0.065566	0.06719	1391	0
SPATA25	6	0.065623	0.067237	1392	1
CHADL	6	0.065671	0.067272	1393	1
ERVW-1	6	0.065676	0.067276	1394	1
TNIP2	6	0.065721	0.06731	1395	1
MIR1197	4	0.065767	0.06735	1396	1
CERS3	6	0.065802	0.067385	1397	1
MIR4287	4	0.065849	0.067428	1398	0
CD200	6	0.066037	0.067602	1399	1
MARCH10	6	0.066082	0.067651	1400	1
NAGPA	6	0.066127	0.067688	1401	1
NDRG1	6	0.066141	0.067698	1402	1
CYFIP1	6	0.066216	0.067767	1403	1
PIK3R3	6	0.06628	0.06783	1404	1
ANP32D	6	0.06634	0.067878	1405	1
HMGB2	6	0.066428	0.067953	1406	1
TM6SF1	6	0.066459	0.067986	1407	1
CDC5L	6	0.066532	0.068059	1408	1
ZNF75A	6	0.066564	0.068091	1409	1
OMD	6	0.066668	0.068194	1410	1
ERAS	6	0.066758	0.06827	1411	1
DECR2	6	0.066765	0.068273	1412	1
ATAD1	6	0.066803	0.068299	1413	1
FBXO8	6	0.066848	0.068336	1414	1
CTNND1	6	0.066862	0.068352	1415	1
USP12	6	0.066937	0.068426	1416	1
TTC21B	6	0.067028	0.068514	1417	1
CSTB	6	0.067056	0.068542	1418	1
CLDN10	6	0.067073	0.068557	1419	1
C15orf38	6	0.067118	0.0686	1420	1
CTDSP2	6	0.067163	0.068639	1421	1
GOLT1B	6	0.067169	0.068648	1422	0
SLC7A2	6	0.067355	0.068808	1423	1
DKK1	6	0.067388	0.068843	1424	1
MREG	6	0.067478	0.068927	1425	1
TM4SF4	6	0.067491	0.068938	1426	1
MIR4303	4	0.067523	0.06896	1427	1
SLC11A1	6	0.067568	0.068995	1428	1
MAGOH	6	0.067593	0.069017	1429	1
PPP1R13B	6	0.067613	0.069038	1430	1
MIR504	4	0.067748	0.069159	1431	1
NMNAT1	6	0.067764	0.069175	1432	1
CAMSAP2	6	0.067772	0.069181	1433	1
SP5	6	0.067793	0.069203	1434	1
IGFL4	6	0.067883	0.069289	1435	1
IL1B	6	0.067976	0.069363	1436	1
HAUS2	6	0.067977	0.069364	1437	1
MIR100	4	0.068098	0.069471	1438	1
TOP3A	6	0.068333	0.069695	1439	1
PLXNA2	6	0.068378	0.069744	1440	1
ZNF530	6	0.068423	0.069781	1441	1
UQCRC1	6	0.068513	0.069857	1442	1
C5orf54	6	0.068607	0.069939	1443	1
LCN10	6	0.068667	0.069989	1444	1
PRIM1	6	0.068693	0.07001	1445	1
CDH19	6	0.068719	0.070034	1446	1
CHRD	6	0.068726	0.070041	1447	1
POU5F1	6	0.068782	0.070096	1448	1
ARMCX4	6	0.068793	0.070106	1449	1
NPAS3	6	0.068872	0.070173	1450	1
PAK3	6	0.068887	0.070187	1451	1
MPV17L2	6	0.068898	0.070197	1452	0
PUS10	6	0.068917	0.070215	1453	1
C12orf49	6	0.068961	0.070241	1454	0
OR2K2	6	0.069016	0.070291	1455	1
MIR765	4	0.069052	0.070324	1456	1
PTCH2	6	0.069097	0.070362	1457	1
C16orf90	6	0.069142	0.070395	1458	1
MIR3689b	4	0.069251	0.070494	1459	1
TNS4	6	0.069255	0.070499	1460	1
EIF4EBP2	6	0.069277	0.070518	1461	1
OR5AP2	6	0.069382	0.070612	1462	1
MIR412	4	0.069542	0.070757	1463	0
MIR4760	4	0.069554	0.070763	1464	1
TENM2	6	0.069592	0.0708	1465	1
CDKL1	6	0.06961	0.070812	1466	1
OR52J3	6	0.069676	0.070873	1467	1
AXDND1	6	0.069681	0.070878	1468	1
TMEM178A	6	0.069684	0.070881	1469	0
MT1M	6	0.069861	0.071038	1470	1
MIR6499	4	0.069906	0.071084	1471	1
MIR4508	4	0.069979	0.071152	1472	1
LRRTM2	6	0.070037	0.071204	1473	1
OR2J3	6	0.070041	0.071208	1474	1
C3orf18	6	0.070129	0.071289	1475	1
ZNF224	6	0.070161	0.071314	1476	1
MIR4720	4	0.070373	0.071486	1477	1
MYH1	6	0.070375	0.071489	1478	0
BCL3	6	0.070394	0.071502	1479	1
NDUFB6	6	0.07049	0.071588	1480	1
ZNF26	6	0.070574	0.071669	1481	1
FBXL20	6	0.070585	0.071681	1482	1
CHI3L1	6	0.070625	0.07172	1483	1
B4GALT4	6	0.070632	0.071725	1484	1
FANCE	6	0.070648	0.071739	1485	1
MIR4253	4	0.07067	0.071759	1486	1
PRRG1	6	0.070767	0.071854	1487	1
RBAK-RBAKDN	6	0.070768	0.071856	1488	0
AGGF1	6	0.070796	0.071882	1489	1
LY96	6	0.07081	0.07189	1490	1
ZKSCAN8	6	0.070929	0.071979	1491	1
ARHGAP18	6	0.070941	0.071986	1492	1
C6orf10	6	0.070989	0.072031	1493	1
OR4K14	6	0.071009	0.07205	1494	1
PROM2	6	0.071048	0.072093	1495	1
MIR3146	4	0.0711	0.072143	1496	1
KCNS1	6	0.071119	0.072156	1497	1
CYTIP	6	0.071119	0.072156	1498	1
NCF2	6	0.071161	0.072192	1499	1
KCNE1L	6	0.071252	0.072276	1500	1
PLEKHA4	6	0.071253	0.072277	1501	1
MIR3123	4	0.071282	0.072303	1502	1
C15orf59	6	0.071286	0.072307	1503	1
PYGM	6	0.071405	0.072419	1504	1
DAD1	6	0.071413	0.072428	1505	0
SELL	6	0.071433	0.072446	1506	1
EPSTI1	6	0.071524	0.072527	1507	1
DMRT2	6	0.071524	0.072527	1508	1
SOX5	6	0.071612	0.072601	1509	1
GSX2	6	0.071926	0.072891	1510	1
PGAM1	6	0.071947	0.072908	1511	0
SMIM11	6	0.072016	0.072965	1512	1
IGFBPL1	6	0.072055	0.073	1513	1
C2orf15	6	0.072061	0.073005	1514	1
OR5K2	6	0.072251	0.07318	1515	1
GSTA1	6	0.072285	0.073214	1516	1
RASL12	6	0.072351	0.073278	1517	1
PDP2	6	0.072372	0.073301	1518	0
ANKRD22	6	0.07251	0.073436	1519	1
MIR6892	4	0.072592	0.073516	1520	0
CCDC146	6	0.072614	0.073544	1521	1
ZNF415	6	0.072689	0.07361	1522	1
PLXNA1	6	0.072734	0.073648	1523	1
GPR123	6	0.072772	0.073681	1524	1
FHOD3	6	0.072779	0.073688	1525	1
STARD3NL	6	0.072796	0.073704	1526	1
TREX1	6	0.072802	0.073708	1527	1
HPCAL4	6	0.072826	0.073726	1528	1
GPR84	6	0.072856	0.073755	1529	1
GNAQ	6	0.072869	0.073765	1530	1
FAM170B	6	0.072891	0.073787	1531	1
MIR1273c	4	0.072953	0.073831	1532	0
PHF10	6	0.072978	0.073849	1533	1
ZMAT3	6	0.073008	0.073874	1534	1
TLK1	6	0.073048	0.073913	1535	1
CCDC110	6	0.073091	0.073952	1536	1
MIR4445	4	0.073126	0.073982	1537	0
KRTAP13-4	6	0.073129	0.073984	1538	1
MSANTD2	6	0.073129	0.073984	1539	1
MIR595	4	0.073159	0.074016	1540	1
NOB1	6	0.07328	0.074131	1541	1
CCDC39	6	0.073401	0.074226	1542	1
USP17L2	6	0.073426	0.07425	1543	1
MIR548av	4	0.073462	0.074286	1544	1
NBAS	6	0.073541	0.07436	1545	1
SMIM15	6	0.073585	0.074405	1546	1
CLINT1	6	0.073599	0.074416	1547	1
TM4SF5	6	0.073608	0.07443	1548	1
IL12RB2	6	0.073613	0.074433	1549	1
ARPC1B	6	0.07363	0.074443	1550	1
FRMD4A	6	0.073692	0.074501	1551	0
CYB561D1	6	0.073723	0.074532	1552	1
THUMPD2	6	0.073825	0.074623	1553	1
USP40	6	0.073841	0.074638	1554	1
RD3	6	0.073864	0.074656	1555	1
KCTD2	6	0.073901	0.074691	1556	1
MRM1	6	0.073944	0.074734	1557	1
HFM1	6	0.074006	0.074781	1558	1
ATXN1L	6	0.074019	0.07479	1559	1
COL23A1	6	0.074078	0.074844	1560	1
FAM19A2	6	0.074138	0.074897	1561	1
SART1	6	0.074213	0.074966	1562	1
MIR4494	4	0.074218	0.074972	1563	1
BCL10	6	0.074257	0.075005	1564	1
IFFO1	6	0.074279	0.075026	1565	1
WSCD1	6	0.074316	0.075066	1566	1
KLHDC10	6	0.074375	0.075122	1567	1
ABAT	6	0.074392	0.075138	1568	1
OR2T2	6	0.074481	0.075226	1569	1
SMIM10	6	0.07449	0.075233	1570	1
RHEB	6	0.074526	0.075272	1571	1
TGIF2LY	6	0.07466	0.075386	1572	1
PDK4	6	0.074672	0.075399	1573	1
SAP18	6	0.074705	0.075437	1574	1
MIR6800	4	0.074732	0.075457	1575	1
DMKN	6	0.07484	0.075551	1576	1
TNFRSF11A	6	0.074914	0.075609	1577	1
MIR8055	4	0.074981	0.075666	1578	0
SPINK9	6	0.075019	0.075697	1579	1
WDR52	6	0.075028	0.075702	1580	1
RGS9	6	0.075063	0.075732	1581	1
GRB2	6	0.075065	0.075733	1582	1
ETFA	6	0.075087	0.075758	1583	1
RPS5	6	0.075242	0.075907	1584	1
LPPR1	6	0.075287	0.075946	1585	1
DISC1	4	0.075421	0.076071	1586	1
C1orf101	6	0.075443	0.076095	1587	1
OR6N1	6	0.075556	0.076202	1588	1
NFE2L3	6	0.075579	0.076226	1589	1
PIGW	6	0.0756	0.076248	1590	1
TRPC6	6	0.075621	0.076262	1591	1
CNGA3	6	0.07568	0.076319	1592	1
FKBP3	6	0.07569	0.076327	1593	1
C8orf37	6	0.075735	0.076365	1594	1
CRK	6	0.07575	0.076373	1595	1
ILDR1	6	0.075869	0.076474	1596	1
ZNF134	6	0.075976	0.076572	1597	1
SLC52A3	6	0.076003	0.076595	1598	1
SLC16A1	6	0.076093	0.076671	1599	1
GIMAP8	6	0.076154	0.076726	1600	1
IFT80	6	0.076213	0.076779	1601	1
SLC22A23	6	0.076332	0.076896	1602	1
PRPF6	6	0.076391	0.076945	1603	1
ZNF740	6	0.076395	0.076949	1604	1
DCTN2	6	0.076474	0.077032	1605	0
TSHZ2	6	0.076495	0.077051	1606	1
SRRM5	6	0.076509	0.077062	1607	1
CCPG1	6	0.076562	0.077106	1608	1
FBXL7	6	0.076569	0.077111	1609	1
IL1RN	6	0.076629	0.077159	1610	1
OR2G6	6	0.076635	0.077165	1611	1
COPA	6	0.076666	0.077192	1612	1
LYPD3	6	0.076674	0.077201	1613	1
N4BP2L2	6	0.076719	0.077241	1614	1
MBLAC1	6	0.076757	0.077279	1615	1
C1orf100	6	0.076853	0.077363	1616	1
MFSD7	6	0.07693	0.077429	1617	1
MIR3926-2	4	0.076993	0.077489	1618	0
MIR208b	4	0.077032	0.077523	1619	1
COPS7B	6	0.077161	0.077644	1620	1
OXER1	6	0.077165	0.077649	1621	0
DDX25	6	0.07718	0.077661	1622	1
USP11	6	0.07722	0.0777	1623	1
SETBP1	6	0.077299	0.077782	1624	1
C12orf52	6	0.0773	0.077784	1625	1
C1orf65	6	0.077309	0.07779	1626	1
GHITM	6	0.077397	0.077873	1627	1
GATA1	6	0.077457	0.077928	1628	1
CSNK2A1	6	0.07752	0.077994	1629	1
C11orf88	6	0.077523	0.077997	1630	1
ZNF32	6	0.077657	0.078112	1631	1
OR2C3	6	0.077667	0.078121	1632	1
WSCD2	6	0.077753	0.078206	1633	1
MAGEF1	6	0.077812	0.078258	1634	1
COL16A1	6	0.078014	0.07846	1635	1
IQSEC3	6	0.078048	0.078491	1636	1
BEX1	6	0.078149	0.078588	1637	1
PRKAR2A	6	0.078183	0.078618	1638	1
MPI	6	0.078256	0.07868	1639	1
TPD52L1	6	0.078372	0.078773	1640	1
ZNF540	6	0.078403	0.078802	1641	1
AIM1	6	0.078417	0.078813	1642	1
CREBL2	6	0.078462	0.07886	1643	1
PRSS58	6	0.078506	0.078902	1644	1
HIST1H2BJ	6	0.078629	0.079024	1645	1
PLAC1	6	0.078689	0.079087	1646	1
INTS12	6	0.07869	0.079088	1647	0
RPS27A	6	0.078699	0.079096	1648	1
ADAM15	6	0.078758	0.079153	1649	1
TMEM177	6	0.078818	0.079206	1650	1
FUT7	6	0.078908	0.079297	1651	1
ZNF726	6	0.078989	0.079376	1652	0
CYP2C19	6	0.078991	0.079378	1653	1
RORA	6	0.078992	0.079381	1654	1
SLC6A12	6	0.078994	0.079382	1655	1
UBXN6	6	0.078997	0.079383	1656	1
C1orf226	6	0.079042	0.079416	1657	1
DEPDC5	6	0.07914	0.079508	1658	1
MIR3916	4	0.079142	0.079509	1659	1
DPH3P1	6	0.07922	0.079576	1660	1
ACSL1	6	0.079232	0.079588	1661	1
PHYKPL	6	0.079256	0.079604	1662	0
ERMARD	6	0.07929	0.079629	1663	1
KLC1	6	0.079309	0.079648	1664	1
AGPAT6	6	0.079353	0.079693	1665	1
BBOX1	6	0.079383	0.079719	1666	1
CBX6	6	0.079399	0.079738	1667	1
MAGEA2	6	0.079413	0.079747	1668	1
RAB31	6	0.079467	0.079806	1669	1
MIR564	4	0.079555	0.079887	1670	0
MEOX1	6	0.079577	0.079908	1671	1
COMT	6	0.079602	0.079932	1672	0
OR51A7	6	0.079644	0.079976	1673	1
MS4A13	6	0.079666	0.079995	1674	1
CEP63	6	0.079756	0.080076	1675	1
ICT1	6	0.079805	0.080117	1676	1
HSPA5	6	0.079845	0.080153	1677	1
CAMKMT	6	0.079881	0.080183	1678	1
SH3PXD2B	6	0.079889	0.080191	1679	1
PRAMEF21	6	0.079986	0.080279	1680	1
ZEB2	6	0.080168	0.080465	1681	0
GCSH	6	0.080246	0.080532	1682	1
OR5B17	6	0.080288	0.080573	1683	1
LTB	6	0.080293	0.080579	1684	0
GYPB	6	0.080294	0.080579	1685	1
SH3GLB1	6	0.080353	0.080635	1686	1
COL22A1	6	0.080391	0.080672	1687	1
CD59	6	0.080425	0.080699	1688	1
MIR4802	4	0.080469	0.080739	1689	1
C21orf62	6	0.080514	0.080782	1690	1
DUSP13	6	0.08053	0.080795	1691	1
TEX12	6	0.080537	0.0808	1692	1
MSI1	6	0.080558	0.080825	1693	1
FAM83A	6	0.080603	0.080867	1694	1
GNRH2	6	0.080647	0.080908	1695	1
SH2D7	6	0.080766	0.081017	1696	1
SELP	6	0.08077	0.081021	1697	1
DCAF4	6	0.080826	0.08107	1698	1
NUTM2G	6	0.080943	0.081174	1699	1
SLFN13	6	0.081004	0.081223	1700	1
HLA-DQB2	6	0.081061	0.081285	1701	1
OR5R1	6	0.081093	0.081316	1702	1
MIR556	3	0.081205	0.081422	1703	0
HIST2H4A	6	0.081297	0.081507	1704	1
SLC28A1	6	0.081418	0.081624	1705	1
CD101	6	0.081533	0.081744	1706	1
GCM2	6	0.081638	0.081841	1707	1
EMP1	6	0.08171	0.081904	1708	1
IAPP	6	0.081785	0.081958	1709	1
DSTN	6	0.081865	0.082036	1710	0
METTL16	6	0.081887	0.082058	1711	1
PDXDC1	6	0.082005	0.082164	1712	1
C16orf96	6	0.082029	0.082187	1713	1
HOXB8	6	0.082118	0.082271	1714	1
MIR33a	4	0.082182	0.082333	1715	1
C6orf52	6	0.082296	0.082432	1716	1
MIR3150a	4	0.082359	0.082489	1717	1
UBALD1	6	0.08243	0.082556	1718	1
OGDHL	6	0.082446	0.08257	1719	1
UBE2K	6	0.082563	0.082664	1720	1
RTKN	6	0.082652	0.082743	1721	1
BET1L	6	0.082697	0.082783	1722	1
TUBGCP6	6	0.082875	0.082951	1723	1
NGEF	6	0.082964	0.083035	1724	1
LRRC1	6	0.082969	0.083038	1725	1
MIR4298	4	0.083008	0.083071	1726	1
SORBS3	6	0.083125	0.083175	1727	1
CAPN7	6	0.083142	0.083191	1728	1
SLC6A18	6	0.083184	0.083225	1729	1
ADORA2B	6	0.083186	0.083228	1730	1
MIR637	4	0.08324	0.083273	1731	1
USPL1	6	0.08333	0.083346	1732	1
USHBP1	6	0.083358	0.083367	1733	0
HBZ	6	0.08339	0.083397	1734	1
HOXC10	6	0.083399	0.083403	1735	1
FUT1	6	0.083498	0.083491	1736	1
RBM23	6	0.083571	0.083553	1737	1
DEFB118	6	0.083587	0.083569	1738	1
SLC29A2	6	0.083619	0.083598	1739	1
SEPT3	6	0.083692	0.083662	1740	1
HLA-G	6	0.083714	0.083688	1741	1
IQCF1	6	0.083781	0.083757	1742	1
C3orf20	6	0.083811	0.083787	1743	1
MESDC1	6	0.083845	0.083818	1744	0
XIRP1	6	0.083872	0.083839	1745	1
PRPS1L1	6	0.083891	0.083857	1746	1
ANKRD50	6	0.083932	0.083894	1747	1
MIR520e	4	0.083962	0.083918	1748	1
PAQR4	6	0.084032	0.08398	1749	1
RCN2	6	0.084143	0.084081	1750	1
SLC14A1	6	0.084185	0.084118	1751	1
SIRPB2	6	0.084205	0.084138	1752	1
LATS2	6	0.084207	0.084139	1753	0
FOXE1	6	0.084254	0.084193	1754	1
HSPA6	6	0.084361	0.084289	1755	1
KLHL6	6	0.08442	0.084343	1756	1
PATL1	6	0.084432	0.084353	1757	1
TSC1	6	0.084473	0.084395	1758	1
ZBED6	6	0.084521	0.084436	1759	1
KIRREL	6	0.084538	0.084451	1760	1
NPM1	6	0.084698	0.084603	1761	1
ABHD11	6	0.084717	0.084622	1762	1
P4HB	6	0.084773	0.084666	1763	1
TACSTD2	6	0.084876	0.084753	1764	1
TMC4	6	0.084924	0.084796	1765	1
DMRTC1	6	0.084937	0.084806	1766	1
SPDYE5	6	0.084984	0.084853	1767	1
SNX3	6	0.085067	0.084928	1768	1
EIF4A3	6	0.08515	0.085015	1769	0
CNNM4	6	0.085187	0.085048	1770	1
NMRK1	6	0.085244	0.085099	1771	1
MRPL27	6	0.08526	0.085111	1772	0
CDY1B	6	0.085276	0.085128	1773	0
ITGA10	6	0.085276	0.085128	1774	1
FARP1	6	0.085305	0.085154	1775	1
OR2A2	6	0.085323	0.08517	1776	0
C14orf166B	6	0.085361	0.085201	1777	1
CTAGE15	6	0.085365	0.085204	1778	1
LOC100288814	6	0.085409	0.085236	1779	1
MIR548aa-2	4	0.085435	0.085268	1780	1
PEX7	6	0.085454	0.085283	1781	1
EIF4A1	6	0.085498	0.085328	1782	1
ZNF630	6	0.085538	0.08537	1783	1
HK2	6	0.085587	0.085414	1784	1
RFWD2	6	0.085596	0.085422	1785	1
TCEB3B	6	0.085632	0.085457	1786	1
SNAP25	6	0.085773	0.085577	1787	1
SHISA3	6	0.085809	0.085608	1788	1
ANXA5	6	0.085815	0.085614	1789	1
SH2D6	6	0.085886	0.085678	1790	1
GARNL3	6	0.085949	0.08574	1791	1
CDK12	6	0.086007	0.085801	1792	1
DENND3	6	0.086067	0.08586	1793	1
C1orf105	6	0.086067	0.085861	1794	1
HUNK	6	0.086184	0.085973	1795	1
RAVER2	6	0.086254	0.086038	1796	1
OR7A10	6	0.086302	0.086084	1797	1
ZMYM2	6	0.086473	0.086235	1798	1
AUTS2	6	0.086475	0.086237	1799	1
GLIS2	6	0.086478	0.086238	1800	1
SUN5	6	0.086517	0.086274	1801	1
SUV420H1	6	0.086537	0.08629	1802	1
OR51T1	6	0.086546	0.086296	1803	1
PROSC	6	0.086653	0.086398	1804	1
ATF6B	6	0.086693	0.086433	1805	1
NLRP11	6	0.086772	0.086511	1806	1
CHRNE	6	0.086889	0.086615	1807	1
CCDC25	6	0.086919	0.086638	1808	1
HIST1H4B	6	0.087052	0.086757	1809	1
MIR5004	4	0.087118	0.086824	1810	1
MYEOV2	6	0.087141	0.086843	1811	1
NECAB3	6	0.087178	0.086884	1812	1
TSN	6	0.08723	0.086933	1813	1
TAF4B	6	0.087274	0.086967	1814	1
ERVMER34-1	6	0.087277	0.086968	1815	1
TBRG4	6	0.087317	0.087007	1816	1
MIR3680-1	4	0.08735	0.087036	1817	0
GLIS3	6	0.087359	0.087045	1818	1
KIF18A	6	0.087452	0.087133	1819	1
MIR3115	4	0.087508	0.087173	1820	0
LITAF	6	0.087539	0.087206	1821	1
ZNF705D	6	0.087569	0.087231	1822	1
OR52K2	6	0.087569	0.087231	1823	1
GRIN2B	6	0.087594	0.087248	1824	1
IDO1	6	0.087659	0.087298	1825	1
KLRC1	6	0.087689	0.087326	1826	1
PTPRN	6	0.087696	0.087335	1827	0
SPTBN4	6	0.08777	0.087397	1828	1
NAPRT1	6	0.087885	0.087497	1829	0
NANOS1	6	0.087946	0.087561	1830	1
RAB4B	6	0.088005	0.087604	1831	1
C14orf39	6	0.088073	0.087667	1832	1
IMMT	6	0.088079	0.087672	1833	1
C4orf21	6	0.088184	0.087779	1834	0
NUP160	6	0.088229	0.087819	1835	1
IGFLR1	6	0.08825	0.08784	1836	1
NPPB	6	0.088294	0.087879	1837	1
UGT2A1	6	0.088298	0.087883	1838	1
RAB35	6	0.088379	0.087961	1839	1
PACSIN3	6	0.088409	0.087985	1840	1
NLRP3	6	0.088499	0.088063	1841	1
METTL14	6	0.088605	0.088156	1842	1
KIF5A	6	0.088649	0.088199	1843	1
PON2	6	0.088686	0.088231	1844	0
AGFG2	6	0.088826	0.088377	1845	1
SNTB1	6	0.088883	0.088424	1846	1
OCEL1	6	0.088884	0.088425	1847	1
HES3	6	0.088889	0.088428	1848	1
PHLDA3	6	0.089029	0.088564	1849	1
UBA7	6	0.089102	0.08864	1850	1
CASP1	6	0.089175	0.088707	1851	1
CTAG2	6	0.089189	0.088722	1852	1
MAN1C1	6	0.089269	0.088799	1853	1
MIR508	4	0.089314	0.088846	1854	1
GTF2H2	6	0.089321	0.088852	1855	1
ATP2B2	6	0.089358	0.088883	1856	1
TMEM257	6	0.089429	0.088954	1857	1
PPM1N	6	0.089467	0.088992	1858	1
CHPF2	6	0.089491	0.089013	1859	1
TNFRSF6B	6	0.089539	0.089056	1860	1
GCOM1	6	0.089685	0.08919	1861	1
FMR1	6	0.089705	0.089204	1862	1
LPHN3	6	0.089801	0.089284	1863	1
MIR4505	4	0.089845	0.089328	1864	1
ZNF449	6	0.089881	0.08936	1865	1
SUMO3	6	0.089904	0.089381	1866	1
DLC1	6	0.089978	0.089448	1867	1
MIR4737	4	0.089999	0.089464	1868	1
HOXC8	6	0.090022	0.089482	1869	1
KHDC1L	6	0.090067	0.089516	1870	1
NANOS3	6	0.090111	0.089549	1871	1
SH2B3	6	0.090179	0.08962	1872	1
NIN	6	0.090239	0.089671	1873	1
ANAPC4	6	0.090243	0.089674	1874	0
DOCK3	6	0.090244	0.089675	1875	1
ICAM2	6	0.090285	0.089713	1876	1
DUSP18	6	0.090332	0.089764	1877	1
NLN	6	0.090376	0.089808	1878	1
RGS19	6	0.090419	0.089847	1879	1
SMIM6	6	0.090421	0.08985	1880	1
NCR2	6	0.090465	0.089902	1881	1
HSBP1	6	0.090466	0.089903	1882	1
PIP	6	0.09062	0.090039	1883	0
ATP7B	6	0.090701	0.090118	1884	1
MTDH	6	0.090775	0.090193	1885	1
MIR4672	4	0.090777	0.090194	1886	0
MIR4709	4	0.090779	0.090197	1887	1
MACROD2	6	0.090818	0.090231	1888	1
PSMA8	6	0.090935	0.090342	1889	1
RSPH6A	6	0.090996	0.090403	1890	1
GNG8	6	0.09104	0.09044	1891	1
MAGED4B	6	0.091044	0.090444	1892	0
KDM6B	6	0.091069	0.090461	1893	1
MAML1	6	0.091078	0.090467	1894	1
MIR4487	4	0.091085	0.090475	1895	1
RAB24	6	0.091215	0.090591	1896	1
CAMTA2	6	0.091261	0.090636	1897	1
TMPRSS2	6	0.091344	0.090711	1898	1
PSMD7	6	0.091394	0.090764	1899	1
ZCWPW2	6	0.09152	0.090878	1900	1
CLLU1OS	6	0.091637	0.090989	1901	1
CD24	6	0.09166	0.091008	1902	1
POF1B	6	0.091725	0.091071	1903	1
G6PD	6	0.091768	0.091113	1904	1
SPOPL	6	0.091917	0.091243	1905	1
ZNF710	6	0.091929	0.091254	1906	1
MIR766	4	0.092007	0.091326	1907	1
PRM2	6	0.09205	0.091369	1908	0
CNTN2	6	0.092058	0.091376	1909	1
MIR362	4	0.092146	0.091457	1910	1
TSPYL6	6	0.092222	0.091529	1911	1
PRMT10	6	0.092456	0.091742	1912	1
RASGRF1	6	0.092514	0.091797	1913	1
ZNF233	6	0.092525	0.091806	1914	1
KRT31	6	0.092544	0.091824	1915	1
CASP12	6	0.092631	0.091896	1916	1
TRAPPC6A	6	0.09267	0.091933	1917	1
URM1	6	0.092689	0.091949	1918	1
FAM129C	6	0.09271	0.091969	1919	0
LOC100652824	6	0.092748	0.09201	1920	1
UNC93B1	6	0.092853	0.092104	1921	1
GRIN2A	6	0.092923	0.092172	1922	1
MIR4462	4	0.092966	0.092214	1923	1
CHMP7	6	0.092982	0.092233	1924	1
GGACT	6	0.093162	0.092387	1925	1
HHLA2	6	0.093179	0.092404	1926	1
TRUB1	6	0.093215	0.092437	1927	1
ACSS2	6	0.093251	0.092468	1928	1
C20orf195	6	0.093324	0.092525	1929	1
NDUFB4	6	0.093325	0.092525	1930	1
NR2F1	6	0.093427	0.092618	1931	1
ISY1	6	0.093449	0.092637	1932	1
RHCE	6	0.093504	0.09268	1933	1
MMP9	6	0.093507	0.092683	1934	1
SLC12A9	6	0.093653	0.092825	1935	0
KIAA1024	6	0.093692	0.092863	1936	1
TEX26	6	0.093714	0.092879	1937	1
CNTF	6	0.093737	0.092896	1938	1
C17orf105	6	0.093833	0.092982	1939	1
SPATA2	6	0.09392	0.093055	1940	0
LUM	6	0.093978	0.093104	1941	1
GABARAPL1	6	0.094002	0.093132	1942	1
MIR1255a	4	0.094046	0.093172	1943	1
ABCG2	6	0.09409	0.093218	1944	1
SLC36A1	6	0.094103	0.093228	1945	1
MDN1	6	0.094312	0.093433	1946	1
MIR7152	4	0.094383	0.093501	1947	1
KCNJ13	6	0.094442	0.093544	1948	1
RPTOR	6	0.094443	0.093545	1949	1
PPP1R14C	6	0.094462	0.093563	1950	1
KLHDC8B	6	0.094552	0.093639	1951	1
HNRNPF	6	0.094558	0.093643	1952	1
FBXO43	6	0.094581	0.093664	1953	1
MIR6848	4	0.094611	0.093698	1954	1
OR2T12	6	0.094617	0.093705	1955	1
MIR1258	4	0.094628	0.093717	1956	0
SSBP4	6	0.09484	0.093903	1957	1
OR4M1	6	0.094894	0.09396	1958	1
TGFBRAP1	6	0.094922	0.093983	1959	1
PRR19	6	0.094967	0.094024	1960	1
PRPF31	6	0.094972	0.094029	1961	1
RD3L	6	0.095105	0.09415	1962	1
DNAI1	6	0.095139	0.094184	1963	1
TMEM140	6	0.095149	0.094192	1964	1
LRP2	6	0.095241	0.094285	1965	1
SLC6A15	6	0.095284	0.094326	1966	1
WDPCP	6	0.095299	0.094344	1967	1
GFM2	6	0.095317	0.094358	1968	1
ZNF77	6	0.095369	0.094404	1969	1
SLC25A34	6	0.095375	0.094409	1970	1
MIR5584	4	0.095458	0.094484	1971	1
SLC35A5	6	0.095479	0.0945	1972	1
MIR3619	4	0.095492	0.09451	1973	0
MIR4643	3	0.095539	0.094562	1974	0
MIR1255b-2	4	0.095571	0.094592	1975	0
PRKRIR	6	0.095618	0.094643	1976	0
ODC1	6	0.095766	0.094783	1977	1
SPANXA2	6	0.095822	0.094832	1978	0
C10orf2	6	0.095867	0.094875	1979	1
KCNK16	6	0.0959	0.094902	1980	1
RAC3	6	0.095943	0.094945	1981	1
TMEM45A	6	0.096016	0.095016	1982	1
CYP11B1	6	0.096017	0.095016	1983	1
KIAA1755	6	0.096075	0.095076	1984	1
MIR151b	4	0.096076	0.095078	1985	1
ARHGAP9	6	0.096251	0.095241	1986	1
KCNN2	6	0.096345	0.095325	1987	1
C1orf54	6	0.096372	0.095348	1988	1
ZFYVE16	6	0.096388	0.095363	1989	0
GJB3	6	0.096424	0.095393	1990	1
MIR4652	4	0.096516	0.095466	1991	1
PPDPF	6	0.096517	0.095468	1992	1
WDR55	6	0.096541	0.09549	1993	1
ARFGEF2	6	0.096599	0.095541	1994	1
SUV39H2	6	0.096604	0.095545	1995	1
SSC5D	6	0.096674	0.095608	1996	1
FZD5	6	0.096692	0.095624	1997	1
SLC16A10	6	0.096734	0.095664	1998	1
TES	6	0.096774	0.095699	1999	1
[truncated: 18,916 more rows]

## Sheet: log10
A1BG	1	-0.753255	0.1765
A1CF	2	-0.0165587	0.96259
A2M	3	-1.22964	0.058933
A2ML1	5	-0.649849	0.22395
A3GALT2	4	-0.0829411	0.82615
A4GALT	6	-0.18532	0.65265
A4GNT	7	-0.0297461	0.9338
AAAS	9	-0.0070667	0.98386
AACS	8	-0.344046	0.45285
AADAC	10	-0.550537	0.28149
AADACL2	11	-0.0455115	0.90051
AADACL3	12	-0.466736	0.3414
AADACL4	13	-0.319918	0.47872
AADAT	14	-0.885856	0.13006
AAED1	15	-0.0235904	0.94713
AAGAB	16	-0.336148	0.46116
AAK1	17	-2.21738	0.006062
AAMDC	18	-0.138591	0.72679
AAMP	19	-0.255558	0.55519
AANAT	20	-0.404801	0.39373
AAR2	21	-0.307426	0.49269
AARD	22	-0.475409	0.33465
AARS	23	-0.739642	0.18212
AARS2	24	-0.624574	0.23737
AARSD1	25	-1.74516	0.017982
AASDH	26	-0.115097	0.76719
AASDHPPT	27	-0.205407	0.62315
AASS	28	-0.0585681	0.87384
AATF	29	-0.0378817	0.91647
AATK	30	-0.733862	0.18456
ABAT	31	-1.12414	0.075138
ABCA1	32	-2.19743	0.006347
ABCA10	33	-0.0216323	0.95141
ABCA12	34	-0.6765	0.21062
ABCA13	35	-1.50537	0.031234
ABCA2	36	-0.453137	0.35226
ABCA3	37	-0.153979	0.70149
ABCA4	38	-0.241679	0.57322
ABCA5	39	-0.190629	0.64472
ABCA6	40	-0.0146589	0.96681
ABCA7	41	-0.138896	0.72628
ABCA8	42	-1.35786	0.043867
ABCA9	43	-0.890995	0.12853
ABCB1	44	-0.560636	0.27502
ABCB10	45	-0.192025	0.64265
ABCB11	46	-0.0070667	0.98386
ABCB4	47	-0.149697	0.70844
ABCB5	48	-0.0218789	0.95087
ABCB6	49	-0.496754	0.3186
ABCB7	50	-0.100054	0.79423
ABCB8	51	-0.0567232	0.87756
ABCB9	52	-0.460046	0.3467
ABCC1	53	-1.2803	0.052444
ABCC10	54	-0.214528	0.6102
ABCC11	55	-0.0234804	0.94737
ABCC12	56	-0.197507	0.63459
ABCC2	57	-1.31177	0.048779
ABCC3	58	-0.131873	0.73812
ABCC4	59	-0.800574	0.15828
ABCC5	60	-0.0665633	0.8579
ABCC6	61	-0.0657794	0.85945
ABCC8	62	-0.226879	0.59309
ABCC9	63	-0.280801	0.52384
ABCD1	64	-0.0455018	0.90053
ABCD2	65	-0.528312	0.29627
ABCD3	66	-0.379614	0.41724
ABCD4	67	-0.115001	0.76736
ABCE1	68	-2.72681	0.0018758
ABCF1	69	-0.247437	0.56567
ABCF2	70	-0.18799	0.64865
ABCF3	71	-0.589138	0.25755
ABCG1	72	-0.284573	0.51931
ABCG2	73	-1.0305	0.093218
ABCG4	74	-0.413109	0.38627
ABCG5	75	-0.0182357	0.95888
ABCG8	76	-0.0218103	0.95102
ABHD1	77	-0.211754	0.61411
ABHD10	78	-0.0542508	0.88257
ABHD11	79	-1.07252	0.084622
ABHD12	80	-0.452311	0.35293
ABHD12B	81	-0.740693	0.18168
ABHD13	82	-0.15916	0.69317
ABHD14A	83	-0.0070667	0.98386
ABHD14B	84	-0.278123	0.52708
ABHD15	85	-0.0305468	0.93208
ABHD16A	86	-0.151355	0.70574
ABHD16B	87	-1.46385	0.034368
ABHD17A	88	-0.143779	0.71816
ABHD17B	89	-2.13264	0.0073681
ABHD17C	90	-0.0610252	0.86891
ABHD2	91	-0.357575	0.43896
ABHD3	92	-0.710166	0.19491
ABHD4	93	-0.693146	0.2027
ABHD5	94	-0.186072	0.65152
ABHD6	95	-0.321245	0.47726
ABHD8	96	-0.725634	0.18809
ABI1	97	-0.767156	0.17094
ABI2	98	-0.156854	0.69686
ABI3	99	-0.975473	0.10581
ABI3BP	100	-0.0543	0.88247
ABL1	101	-0.0708417	0.84949
ABL2	102	-0.358625	0.4379
ABLIM1	103	-0.397452	0.40045
ABLIM2	104	-0.0850806	0.82209
ABLIM3	105	-0.194255	0.63936
ABO	106	-0.28735	0.516
ABP1	107	-0.212136	0.61357
ABR	108	-0.172463	0.67226
ABRA	109	-0.716043	0.19229
ABRACL	110	-0.114249	0.76869
ABT1	111	-0.115341	0.76676
ABTB1	112	-0.388734	0.40857
ABTB2	113	-0.441796	0.36158
ACAA1	114	-0.429515	0.37195
ACAA2	115	-0.465542	0.34234
ACACA	116	-0.401899	0.39637
ACACB	117	-0.346064	0.45075
ACAD10	118	-1.50364	0.031359
ACAD11	119	-0.213156	0.61213
ACAD8	120	-0.369623	0.42695
ACAD9	121	-0.592235	0.25572
ACADL	122	-0.0711997	0.84879
ACADM	123	-0.320109	0.47851
ACADS	124	-0.248251	0.56461
ACADSB	125	-0.494769	0.32006
ACADVL	126	-0.0174167	0.96069
ACAN	127	-0.0963078	0.80111
ACAP1	128	-0.361501	0.43501
ACAP2	129	-0.261378	0.5478
ACAP3	130	-0.410922	0.38822
ACAT1	131	-0.186599	0.65073
ACAT2	132	-0.63935	0.22943
ACBD3	133	-0.13304	0.73614
ACBD4	134	-0.0146454	0.96684
ACBD5	135	-0.240166	0.57522
ACBD6	136	-0.0226789	0.94912
ACBD7	137	-0.184901	0.65328
ACCS	138	-0.20444	0.62454
ACCSL	139	-0.293803	0.50839
ACD	140	-0.113024	0.77086
ACE	141	-0.0634008	0.86417
ACE2	142	-0.640468	0.22884
ACER1	143	-0.127611	0.7454
ACER2	144	-0.169379	0.67705
ACER3	145	-0.0341213	0.92444
ACHE	146	-0.0534298	0.88424
ACIN1	147	-0.329448	0.46833
ACKR2	148	-0.949311	0.11238
ACKR3	149	-0.796043	0.15994
ACKR4	150	-0.148583	0.71026
ACLY	151	-0.226045	0.59423
ACMSD	152	-0.380771	0.41613
ACN9	155	-0.2143	0.61052
ACO1	154	-0.0904654	0.81196
ACO2	159	-0.208731	0.6184
ACOT1	156	-0.13145	0.73884
ACOT11	153	-0.35803	0.4385
ACOT12	158	-0.262974	0.54579
ACOT13	160	-0.193589	0.64034
ACOT2	157	-1.2886	0.051452
ACOT4	161	-0.417914	0.38202
ACOT6	162	-0.0435194	0.90465
ACOT7	163	-0.366097	0.43043
ACOT8	164	-0.687653	0.20528
ACOT9	165	-0.0881662	0.81627
ACOX1	166	-0.0811627	0.82954
ACOX2	167	-0.948269	0.11265
ACOX3	168	-0.0269415	0.93985
ACOXL	169	-0.667097	0.21523
ACP1	170	-0.0255989	0.94276
ACP2	171	-0.285528	0.51817
ACP5	172	-0.159976	0.69187
ACP6	173	-0.52165	0.30085
ACPL2	174	-0.0611002	0.86876
ACPP	175	-0.619264	0.24029
ACPT	176	-0.693747	0.20242
ACR	177	-0.403051	0.39532
ACRBP	178	-0.147422	0.71216
ACRC	179	-1.23437	0.058295
ACRV1	180	-1.43212	0.036973
ACSBG1	181	-1.46767	0.034067
ACSBG2	182	-0.512042	0.30758
ACSF2	183	-0.453568	0.35191
ACSF3	184	-0.0387118	0.91472
ACSL1	185	-1.09915	0.079588
ACSL3	186	-0.151897	0.70486
ACSL4	187	-0.0641956	0.86259
ACSL5	188	-0.251115	0.5609
ACSL6	189	-0.112625	0.77157
ACSM1	190	-0.246969	0.56628
ACSM2A	191	-0.735536	0.18385
ACSM2B	192	-0.99123	0.10204
ACSM3	193	-0.209891	0.61675
ACSM4	194	-0.723883	0.18885
ACSM5	195	-0.719262	0.19087
ACSS1	196	-0.226045	0.59423
ACSS2	197	-1.03401	0.092468
ACSS3	198	-0.0993161	0.79558
ACTA1	199	-0.339913	0.45718
ACTA2	200	-0.269775	0.53731
ACTB	201	-0.647837	0.22499
ACTBL2	202	-0.633054	0.23278
ACTC1	203	-0.936554	0.11573
ACTG1	204	-0.0951763	0.8032
ACTG2	205	-0.28656	0.51694
ACTL10	206	-0.42167	0.37873
ACTL6A	207	-1.34271	0.045424
ACTL6B	208	-0.293752	0.50845
ACTL7A	209	-0.147929	0.71133
ACTL7B	210	-0.0964	0.80094
ACTL8	211	-0.0316945	0.92962
ACTL9	212	-0.549859	0.28193
ACTN1	213	-0.117658	0.76268
ACTN2	214	-0.0850437	0.82216
ACTN4	215	-0.336186	0.46112
ACTR10	217	-0.0212171	0.95232
ACTR1A	216	-0.151245	0.70592
ACTR1B	218	-0.110726	0.77495
ACTR2	219	-0.111192	0.77412
ACTR3	220	-0.116952	0.76392
ACTR3B	221	-0.757136	0.17493
ACTR3C	222	-0.21305	0.61228
ACTR5	223	-0.0733695	0.84456
ACTR6	224	-0.330944	0.46672
ACTR8	225	-0.713027	0.19363
ACTRT1	226	-0.427233	0.37391
ACTRT2	227	-0.390918	0.40652
ACTRT3	228	-0.0636924	0.86359
ACVR1	229	-0.760901	0.17342
ACVR1B	230	-0.110889	0.77466
ACVR1C	231	-0.398125	0.39983
ACVR2A	232	-1.23561	0.058128
ACVR2B	233	-0.160076	0.69171
ACVRL1	234	-0.575772	0.2656
ACY1	235	-0.788266	0.16283
ACY3	236	-0.748824	0.17831
ACYP1	237	-0.151743	0.70511
ACYP2	238	-0.891909	0.12826
ADA	239	-0.260396	0.54904
ADAD1	240	-0.868734	0.13529
ADAD2	241	-1.17624	0.066644
ADAL	242	-0.198274	0.63347
ADAM10	243	-0.0353869	0.92175
ADAM11	244	-0.70981	0.19507
ADAM12	245	-0.37442	0.42226
ADAM15	246	-1.10153	0.079153
ADAM17	247	-0.267397	0.54026
ADAM18	248	-0.0430012	0.90573
ADAM19	249	-0.666412	0.21557
ADAM2	250	-0.125263	0.74944
ADAM20	251	-1.45514	0.035064
ADAM21	252	-0.0070667	0.98386
ADAM22	254	-0.040658	0.91063
ADAM23	253	-0.23168	0.58657
ADAM28	255	-0.32768	0.47024
ADAM29	256	-0.350626	0.44604
ADAM30	257	-0.360922	0.43559
ADAM32	258	-0.871633	0.13439
ADAM33	259	-0.0953223	0.80293
ADAM7	260	-0.217083	0.60662
ADAM8	261	-0.159794	0.69216
ADAM9	262	-0.433315	0.36871
ADAMDEC1	263	-0.334945	0.46244
ADAMTS1	264	-0.373003	0.42364
ADAMTS10	265	-1.37486	0.042183
ADAMTS12	266	-0.179523	0.66142
ADAMTS13	267	-0.233424	0.58422
ADAMTS14	268	-0.0388448	0.91444
ADAMTS15	270	-0.94382	0.11381
ADAMTS16	269	-0.207741	0.61981
ADAMTS17	271	-0.188311	0.64817
ADAMTS18	272	-0.483742	0.32829
ADAMTS19	273	-0.443408	0.36024
ADAMTS2	274	-0.506933	0.31122
ADAMTS20	275	-0.440908	0.36232
ADAMTS3	276	-0.707058	0.19631
ADAMTS4	277	-0.455609	0.35026
ADAMTS5	278	-0.437327	0.36532
ADAMTS6	279	-0.0333749	0.92603
ADAMTS7	280	-0.225717	0.59468
ADAMTS8	281	-0.134316	0.73398
ADAMTS9	282	-0.364466	0.43205
ADAMTSL1	283	-0.187555	0.6493
ADAMTSL2	284	-1.23882	0.057701
ADAMTSL3	285	-0.950627	0.11204
ADAMTSL4	286	-0.73044	0.18602
ADAMTSL5	287	-1.46373	0.034377
ADAP1	288	-0.269412	0.53776
ADAP2	289	-0.480067	0.33108
ADAR	290	-0.181695	0.65812
ADARB1	291	-0.0557691	0.87949
ADARB2	292	-0.487169	0.32571
ADAT1	293	-0.685543	0.20628
ADAT2	294	-0.0756277	0.84018
ADAT3	295	-0.295712	0.50616
ADC	296	-0.352803	0.44381
ADCK1	297	-0.321527	0.47695
ADCK2	298	-0.5014	0.31521
ADCK3	299	-0.0796731	0.83239
ADCK4	300	-0.0833987	0.82528
ADCK5	301	-1.84637	0.014244
ADCY1	302	-0.281017	0.52358
ADCY10	303	-0.10878	0.77843
ADCY2	304	-0.29769	0.50386
ADCY3	305	-0.283304	0.52083
ADCY4	306	-0.0547481	0.88156
ADCY5	307	-0.26421	0.54424
ADCY6	308	-0.103832	0.78735
ADCY7	309	-0.841577	0.14402
ADCY8	310	-0.500698	0.31572
ADCY9	311	-0.324744	0.47343
ADCYAP1	312	-1.37212	0.04245
ADCYAP1R1	313	-0.239193	0.57651
ADD1	314	-0.372122	0.4245
ADD2	315	-0.373249	0.4234
ADD3	316	-0.0947602	0.80397
ADH1A	317	-0.179516	0.66143
ADH1B	318	-0.223786	0.59733
ADH4	319	-0.432139	0.36971
ADH5	320	-0.556471	0.27767
ADH6	321	-0.0876451	0.81725
ADH7	322	-0.0800281	0.83171
ADHFE1	323	-0.0449476	0.90168
ADI1	324	-0.518844	0.3028
ADIG	325	-0.146077	0.71437
ADIPOQ	326	-0.597378	0.25271
ADIPOR1	327	-0.14367	0.71834
ADIPOR2	328	-0.930332	0.1174
ADIRF	329	-0.50361	0.31361
ADK	330	-0.807851	0.15565
ADM	331	-0.240823	0.57435
ADM2	332	-2.82708	0.0014891
ADM5	333	-0.113188	0.77057
ADNP	334	-0.569893	0.26922
ADNP2	335	-0.149188	0.70927
ADO	336	-0.130387	0.74065
ADORA1	337	-0.851829	0.14066
ADORA2A	338	-0.203037	0.62656
ADORA2B	339	-1.07973	0.083228
ADORA3	340	-0.22707	0.59283
ADPGK	341	-2.18501	0.0065312
ADPRH	342	-0.673767	0.21195
ADPRHL1	343	-0.199964	0.63101
ADPRHL2	344	-1.21538	0.060901
ADPRM	345	-0.383472	0.41355
ADRA1A	346	-1.55959	0.027568
ADRA1B	347	-0.254348	0.55674
ADRA1D	348	-0.723171	0.18916
ADRA2A	349	-0.406991	0.39175
ADRA2B	350	-0.231081	0.58738
ADRA2C	351	-0.821397	0.15087
ADRB1	352	-0.199331	0.63193
ADRB2	353	-0.382203	0.41476
ADRB3	354	-0.17993	0.6608
ADRBK1	355	-0.0574661	0.87606
ADRBK2	356	-0.266241	0.5417
ADRM1	357	-0.203488	0.62591
ADSL	358	-0.239133	0.57659
ADSS	359	-0.0401862	0.91162
ADSSL1	360	-0.58203	0.2618
ADTRP	361	-0.575184	0.26596
AEBP1	362	-0.0701521	0.85084
AEBP2	363	-0.95711	0.11038
AEN	364	-0.401439	0.39679
AES	365	-0.106199	0.78307
AFAP1	366	-0.178906	0.66236
AFAP1L1	367	-0.300483	0.50063
AFAP1L2	368	-0.427756	0.37346
AFF1	369	-0.821081	0.15098
AFF2	370	-1.21857	0.060454
AFF3	371	-0.712982	0.19365
AFF4	372	-0.0518023	0.88756
AFG3L2	373	-0.514761	0.30566
AFM	374	-0.267518	0.54011
AFMID	375	-0.461351	0.34566
AFP	376	-0.990379	0.10224
AFTPH	377	-0.547646	0.28337
AGA	378	-0.0598722	0.87122
AGAP1	379	-0.158065	0.69492
AGAP11	380	-1.78712	0.016326
AGAP2	381	-0.0629739	0.86502
AGAP3	382	-0.14615	0.71425
AGAP4	383	-0.420937	0.37937
AGAP5	384	-0.0070667	0.98386
AGAP6	385	-0.029063	0.93527
AGAP7	386	-0.0070667	0.98386
AGAP8	387	-0.0070667	0.98386
AGAP9	388	-0.0070667	0.98386
AGBL1	389	-0.134582	0.73353
AGBL2	391	-0.2214	0.60062
AGBL3	390	-0.143126	0.71924
AGBL4	392	-0.113673	0.76971
AGBL5	393	-0.0580912	0.8748
AGER	394	-0.485107	0.32726
AGFG1	395	-0.253311	0.55807
AGFG2	396	-1.05366	0.088377
AGGF1	397	-1.14338	0.071882
AGK	398	-0.576328	0.26526
AGL	399	-0.742034	0.18112
AGMAT	400	-0.612183	0.24424
AGMO	401	-0.661245	0.21815
AGO1	402	-0.573212	0.26717
AGO2	403	-0.366471	0.43006
AGO3	404	-0.332136	0.46544
AGO4	405	-0.0841835	0.82379
AGPAT1	406	-0.286316	0.51723
AGPAT2	407	-0.222653	0.59889
AGPAT3	408	-0.107811	0.78017
AGPAT4	409	-0.0227887	0.94888
AGPAT5	410	-1.19619	0.063651
AGPAT6	411	-1.09858	0.079693
AGPAT9	412	-0.0860008	0.82035
AGPHD1	413	-1.18262	0.065672
AGPS	414	-0.0292999	0.93476
AGR2	415	-0.775519	0.16768
AGR3	416	-0.573017	0.26729
AGRN	417	-0.135234	0.73243
AGRP	419	-0.51667	0.30432
AGT	418	-0.166968	0.68082
AGTPBP1	420	-0.375058	0.42164
AGTR1	421	-0.246348	0.56709
AGTR2	422	-0.0996056	0.79505
AGTRAP	423	-0.790271	0.16208
AGXT	424	-0.650995	0.22336
AGXT2	425	-0.471932	0.33734
AGXT2L1	426	-0.660608	0.21847
AGXT2L2	427	-0.398603	0.39939
AHCTF1	428	-0.273444	0.53279
AHCY	429	-0.671009	0.2133
AHCYL1	430	-1.45832	0.034808
AHCYL2	431	-0.11965	0.75919
AHDC1	432	-0.0965627	0.80064
AHI1	433	-0.118587	0.76105
AHNAK	434	-0.429235	0.37219
AHNAK2	435	-0.0070667	0.98386
AHR	436	-0.888234	0.12935
AHRR	437	-0.622676	0.23841
AHSA1	438	-0.975145	0.10589
AHSA2	439	-0.0803676	0.83106
AHSG	440	-0.0492945	0.8927
AHSP	441	-0.468943	0.33967
AICDA	442	-0.104141	0.78679
AIDA	443	-0.0631496	0.86467
AIF1	444	-0.417721	0.38219
AIF1L	445	-0.426003	0.37497
AIFM1	446	-0.0795479	0.83263
AIFM2	447	-0.170497	0.67531
AIFM3	448	-0.966094	0.10812
AIG1	449	-0.174451	0.66919
AIM1	450	-1.1034	0.078813
AIM2	451	-0.343796	0.45311
AIMP1	452	-0.0163827	0.96298
AIMP2	453	-0.196147	0.63658
AIP	454	-0.102483	0.7898
AIPL1	455	-1.1907	0.064461
AIRE	456	-0.936704	0.11569
AJAP1	457	-0.403634	0.39479
AJUBA	458	-0.30018	0.50098
AK1	459	-0.36179	0.43472
AK2	460	-0.236834	0.57965
AK3	461	-0.234637	0.58259
AK4	462	-0.765888	0.17144
AK5	463	-0.0154862	0.96497
AK6	464	-0.0763209	0.83884
AK7	467	-0.128036	0.74467
AK8	466	-0.135815	0.73145
AK9	465	-0.0961561	0.80139
AKAP1	468	-0.334222	0.46321
AKAP10	469	-0.47576	0.33438
AKAP11	470	-0.430345	0.37124
AKAP12	471	-0.724735	0.18848
AKAP13	472	-0.0933795	0.80653
AKAP14	473	-0.192973	0.64125
AKAP17A_X	474	-0.425471	0.37543
AKAP17A_Y	475	-0.0070667	0.98386
AKAP2	476	-0.119507	0.75944
AKAP3	477	-0.153279	0.70262
AKAP4	478	-0.720561	0.1903
AKAP5	479	-0.181457	0.65848
AKAP6	480	-0.148259	0.71079
AKAP7	481	-0.621857	0.23886
AKAP8	482	-0.0438988	0.90386
AKAP8L	483	-0.894115	0.12761
AKAP9	484	-0.751438	0.17724
AKIP1	485	-0.52031	0.30178
AKIRIN1	486	-0.787599	0.16308
AKIRIN2	487	-0.311758	0.4878
AKNA	488	-1.19667	0.063582
AKNAD1	489	-0.0590057	0.87296
AKR1A1	490	-1.53724	0.029024
AKR1B1	491	-0.325405	0.47271
AKR1B10	492	-0.372296	0.42433
AKR1B15	493	-0.425633	0.37529
AKR1C1	494	-0.0931372	0.80698
AKR1C2	495	-0.0415604	0.90874
AKR1C3	496	-0.456379	0.34964
AKR1C4	497	-0.0461485	0.89919
AKR1D1	498	-0.47537	0.33468
AKR1E2	499	-2.50317	0.0031393
AKR7A2	500	-0.42927	0.37216
AKR7A3	501	-0.327265	0.47069
AKT1	502	-0.404416	0.39408
AKT1S1	503	-0.246693	0.56664
AKT2	504	-0.256804	0.5536
AKT3	505	-1.43189	0.036992
AKTIP	507	-0.507449	0.31085
ALAD	508	-0.373465	0.42319
ALAS1	506	-0.112467	0.77185
ALAS2	509	-0.228045	0.5915
ALB	510	-0.145057	0.71605
ALCAM	511	-0.277292	0.52809
ALDH16A1	512	-0.0434186	0.90486
ALDH18A1	513	-0.976459	0.10557
ALDH1A1	514	-1.57771	0.026442
ALDH1A2	515	-0.172069	0.67287
ALDH1A3	516	-0.0930996	0.80705
ALDH1B1	517	-0.593204	0.25515
ALDH1L1	518	-0.30465	0.49585
ALDH1L2	519	-0.266642	0.5412
ALDH2	520	-0.351933	0.4447
ALDH3A1	521	-1.42246	0.037804
ALDH3A2	522	-1.66575	0.02159
ALDH3B1	523	-0.149274	0.70913
ALDH3B2	524	-0.551402	0.28093
ALDH4A1	525	-1.22173	0.060016
ALDH5A1	526	-0.211591	0.61434
ALDH6A1	527	-0.527829	0.2966
ALDH7A1	528	-0.42306	0.37752
ALDH8A1	529	-0.142752	0.71986
ALDH9A1	530	-0.478352	0.33239
ALDOA	531	-0.022926	0.94858
ALDOB	532	-0.274554	0.53143
ALDOC	534	-0.2548	0.55616
ALG1	533	-0.199936	0.63105
ALG10	535	-0.388978	0.40834
ALG10B	536	-0.170214	0.67575
ALG11	537	-0.0898293	0.81315
ALG12	538	-0.302631	0.49816
ALG13	539	-0.105922	0.78357
ALG14	540	-0.150034	0.70789
ALG1L	541	-0.461703	0.34538
ALG2	542	-0.0070667	0.98386
ALG3	543	-0.58521	0.25989
ALG5	544	-0.215511	0.60882
ALG6	545	-0.669525	0.21403
ALG8	546	-0.982883	0.10402
ALG9	547	-0.0550635	0.88092
ALK	548	-0.178552	0.6629
ALKBH1	549	-0.366511	0.43002
ALKBH2	550	-0.162184	0.68836
ALKBH3	551	-0.278	0.52723
ALKBH4	552	-0.18095	0.65925
ALKBH5	553	-0.246095	0.56742
ALKBH6	554	-0.765584	0.17156
ALKBH7	555	-0.658823	0.21937
ALKBH8	559	-0.761076	0.17335
ALLC	556	-0.824662	0.14974
ALMS1	558	-0.524271	0.29904
ALOX12	557	-0.160403	0.69119
ALOX12B	560	-0.458458	0.34797
ALOX15	561	-0.110659	0.77507
ALOX15B	562	-0.0769478	0.83763
ALOX5	563	-0.0898293	0.81315
ALOX5AP	564	-0.0597575	0.87145
ALOXE3	565	-0.960784	0.10945
ALPI	566	-0.196666	0.63582
ALPK1	567	-0.0748685	0.84165
ALPK2	568	-0.629487	0.2347
ALPK3	569	-0.0923791	0.80839
ALPL	570	-0.435523	0.36684
ALPP	571	-0.374153	0.42252
ALPPL2	572	-0.490166	0.32347
ALS2	573	-0.807516	0.15577
ALS2CL	574	-0.538577	0.28935
ALS2CR11	575	-0.882828	0.13097
ALS2CR12	577	-0.200466	0.63028
ALS2CR8	576	-0.340845	0.4562
ALX1	578	-0.975884	0.10571
ALX3	579	-0.769398	0.17006
ALX4	580	-0.161604	0.68928
ALYREF	581	-0.0550389	0.88097
AMACR	582	-1.21978	0.060287
AMBN	583	-1.31269	0.048675
AMBP	584	-0.711639	0.19425
AMBRA1	585	-0.0971815	0.7995
AMD1	586	-0.384755	0.41233
AMDHD1	587	-0.102604	0.78958
AMDHD2	588	-0.644989	0.22647
AMELX	589	-0.295515	0.50639
AMELY	590	-1.5626	0.027378
AMER1	591	-0.139992	0.72445
AMER2	592	-0.28203	0.52236
AMER3	593	-0.447393	0.35695
AMFR	597	-1.65612	0.022074
AMH	596	-0.0942904	0.80484
AMHR2	598	-0.178631	0.66278
AMICA1	595	-0.246034	0.5675
AMIGO1	594	-0.234876	0.58227
AMIGO2	599	-0.972121	0.10663
AMIGO3	600	-0.0480945	0.89517
AMMECR1	601	-0.478522	0.33226
AMMECR1L	602	-0.0070667	0.98386
AMN	603	-0.395256	0.40248
AMN1	604	-0.124325	0.75106
AMOT	605	-0.611988	0.24435
AMOTL1	606	-0.402656	0.39568
AMOTL2	607	-0.480513	0.33074
AMPD1	608	-0.0576298	0.87573
AMPD2	609	-0.0683896	0.8543
AMPD3	610	-0.168879	0.67783
AMPH	611	-0.118804	0.76067
AMT	612	-0.070244	0.85066
AMTN	613	-0.127057	0.74635
AMY1A	614	-0.448282	0.35622
AMY1B	615	-0.599669	0.25138
AMY1C	616	-0.0387641	0.91461
AMY2A	617	-1.01069	0.097568
AMY2B	618	-0.203412	0.62602
AMZ1	619	-0.161012	0.69022
AMZ2	620	-0.0703716	0.85041
ANAPC1	621	-0.970535	0.10702
ANAPC10	622	-0.0285432	0.93639
ANAPC11	623	-0.36181	0.4347
ANAPC13	624	-0.0264611	0.94089
ANAPC15	625	-0.293359	0.50891
ANAPC16	626	-0.363372	0.43314
ANAPC2	627	-0.786137	0.16363
ANAPC4	628	-1.04733	0.089674
ANAPC5	629	-0.573879	0.26676
ANAPC7	630	-0.0780795	0.83545
ANG	631	-2.36638	0.0043015
ANGEL1	632	-0.303312	0.49738
ANGEL2	633	-0.410553	0.38855
ANGPT1	634	-0.315909	0.48316
ANGPT2	635	-0.419349	0.38076
ANGPT4	636	-0.0919334	0.80922
ANGPTL1	637	-0.0185801	0.95812
ANGPTL2	638	-0.311616	0.48796
ANGPTL3	639	-0.460109	0.34665
ANGPTL4	640	-1.48833	0.032484
ANGPTL5	641	-0.156406	0.69758
ANGPTL6	645	-0.323316	0.47499
ANGPTL7	648	-0.250519	0.56167
ANHX	647	-0.250356	0.56188
ANK1	642	-0.0070667	0.98386
ANK2	646	-0.213305	0.61192
ANK3	643	-0.483478	0.32849
ANKAR	644	-0.961261	0.10933
ANKDD1A	649	-0.155436	0.69914
ANKDD1B	650	-0.113329	0.77032
ANKEF1	651	-0.144202	0.71746
ANKFN1	652	-0.147819	0.71151
ANKFY1	653	-0.207538	0.6201
ANKH	654	-0.457523	0.34872
ANKHD1	655	-0.909848	0.12307
ANKHD1-EIF4EBP3	656	-0.137022	0.72942
ANKIB1	657	-0.400182	0.39794
ANKK1	658	-0.255668	0.55505
ANKLE2	659	-0.150194	0.70763
ANKMY1	660	-0.177675	0.66424
ANKMY2	661	-0.128602	0.7437
ANKRA2	662	-0.116844	0.76411
ANKRD1	663	-1.68791	0.020516
ANKRD10	664	-1.19554	0.063747
ANKRD11	665	-1.44625	0.035789
ANKRD12	666	-0.263237	0.54546
ANKRD13A	667	-0.771805	0.16912
ANKRD13B	668	-1.62659	0.023627
ANKRD13C	669	-0.232755	0.58512
ANKRD13D	670	-0.458196	0.34818
ANKRD16	671	-0.335086	0.46229
ANKRD17	672	-0.110424	0.77549
ANKRD18A	673	-0.311171	0.48846
ANKRD18B	674	-0.572969	0.26732
ANKRD2	675	-0.613608	0.24344
ANKRD20A1	676	-0.180456	0.66
ANKRD20A2	677	-0.692012	0.20323
ANKRD20A3	678	-0.650179	0.22378
ANKRD20A4	679	-0.0070667	0.98386
ANKRD22	680	-1.13409	0.073436
ANKRD23	681	-0.569812	0.26927
ANKRD24	682	-0.0070667	0.98386
ANKRD26	683	-0.0839358	0.82426
ANKRD27	684	-0.365583	0.43094
ANKRD28	685	-0.306959	0.49322
ANKRD29	686	-0.876181	0.13299
ANKRD30A	687	-0.0606605	0.86964
ANKRD30B	688	-0.208246	0.61909
ANKRD32	689	-0.0370438	0.91824
ANKRD33	690	-0.0588415	0.87329
ANKRD33B	691	-0.0602462	0.87047
ANKRD34A	692	-0.0394341	0.9132
ANKRD34B	693	-0.159869	0.69204
ANKRD34C	694	-0.342705	0.45425
ANKRD35	695	-0.769423	0.17005
ANKRD36	696	-0.230807	0.58775
ANKRD37	697	-0.0760362	0.83939
ANKRD39	698	-0.13255	0.73697
ANKRD40	699	-0.583509	0.26091
ANKRD42	700	-0.881173	0.13147
ANKRD44	701	-0.032925	0.92699
ANKRD45	702	-0.19522	0.63794
ANKRD46	703	-0.1636	0.68612
ANKRD49	704	-0.515216	0.30534
ANKRD50	705	-1.07627	0.083894
ANKRD52	706	-1.26704	0.05407
ANKRD53	707	-0.913961	0.12191
ANKRD54	708	-0.0555716	0.87989
ANKRD55	709	-0.681394	0.20826
ANKRD6	710	-0.163151	0.68683
ANKRD61	711	-0.251789	0.56003
ANKRD62	716	-0.090321	0.81223
ANKRD65	713	-0.726466	0.18773
ANKRD66	715	-0.131855	0.73815
ANKRD7	718	-0.19522	0.63794
ANKRD9	712	-0.25821	0.55181
ANKS1A	714	-0.0677749	0.85551
ANKS1B	720	-0.0566836	0.87764
ANKS3	719	-0.529457	0.29549
ANKS4B	721	-0.346334	0.45047
ANKS6	717	-0.450335	0.35454
ANKZF1	722	-0.522864	0.30001
ANLN	723	-0.361062	0.43545
ANO1	724	-3.24941	0.0005631
ANO10	725	-0.534513	0.29207
ANO3	726	-0.0723987	0.84645
ANO4	727	-0.926942	0.11832
ANO5	728	-0.351933	0.4447
ANO6	729	-2.19379	0.0064005
ANO7	730	-0.153663	0.702
ANO8	731	-0.149856	0.70818
ANO9	732	-0.128772	0.74341
ANP32A	733	-0.232673	0.58523
ANP32B	734	-0.353792	0.4428
ANP32D	735	-1.16827	0.067878
ANP32E	736	-0.0474061	0.89659
ANPEP	737	-0.19256	0.64186
ANTXR1	738	-1.55143	0.028091
ANTXR2	739	-0.0959935	0.80169
ANXA1	740	-0.566951	0.27105
ANXA10	741	-0.168847	0.67788
ANXA11	742	-0.16134	0.6897
ANXA13	743	-0.067227	0.85659
ANXA2	745	-0.288471	0.51467
ANXA2R	744	-0.142125	0.7209
ANXA3	746	-0.96449	0.10852
ANXA4	747	-0.162241	0.68827
ANXA5	748	-1.06746	0.085614
ANXA6	749	-0.686914	0.20563
ANXA7	750	-0.779657	0.16609
ANXA8	751	-0.204774	0.62406
ANXA8L1	752	-0.557991	0.2767
ANXA8L2	753	-0.0917027	0.80965
ANXA9	754	-0.0464578	0.89855
AOAH	755	-0.135525	0.73194
AOC1	756	-0.0070667	0.98386
AOC2	757	-1.2214	0.060062
AOC3	758	-0.393791	0.40384
AOX1	759	-0.691542	0.20345
AP1AR	760	-0.267389	0.54027
AP1B1	761	-0.0900591	0.81272
AP1G1	762	-0.385008	0.41209
AP1G2	763	-0.208815	0.61828
AP1M1	764	-0.0271032	0.9395
AP1M2	765	-0.374832	0.42186
AP1S1	766	-0.105031	0.78518
AP1S2	767	-0.363171	0.43334
AP1S3	768	-0.35565	0.44091
AP2A1	769	-0.209082	0.6179
AP2A2	770	-0.694993	0.20184
AP2B1	771	-1.18805	0.064856
AP2M1	772	-0.534127	0.29233
AP2S1	773	-0.104125	0.78682
AP3B1	774	-0.0243385	0.9455
AP3B2	775	-0.407601	0.3912
AP3D1	776	-0.0515479	0.88808
AP3M1	777	-1.00408	0.099064
AP3M2	778	-0.0586725	0.87363
AP3S1	779	-1.61811	0.024093
AP3S2	780	-0.485094	0.32727
AP4B1	781	-0.223873	0.59721
AP4E1	782	-0.160239	0.69145
AP4M1	783	-0.134274	0.73405
AP4S1	784	-0.0143266	0.96755
AP5B1	785	-0.951908	0.11171
AP5M1	786	-0.202823	0.62687
AP5S1	787	-0.8175	0.15223
AP5Z1	788	-0.182355	0.65712
APAF1	789	-0.293777	0.50842
APBA1	790	-0.511633	0.30787
APBA2	791	-0.0189837	0.95723
APBA3	792	-0.581732	0.26198
APBB1	793	-1.61796	0.024101
APBB1IP	805	-0.0162475	0.96328
APBB2	794	-0.135519	0.73195
APBB3	795	-1.90431	0.012465
APC	806	-0.223887	0.59719
APC2	815	-0.109942	0.77635
APCDD1	811	-0.157054	0.69654
APCDD1L	813	-0.480408	0.33082
APCS	814	-0.107894	0.78002
APEH	799	-0.240869	0.57429
APEX1	804	-0.8544	0.13983
APEX2	801	-1.38122	0.04157
APH1A	798	-0.0468736	0.89769
APH1B	810	-0.295275	0.50667
API5	796	-0.0307892	0.93156
APIP	800	-0.576754	0.265
APITD1	816	-0.159486	0.69265
APITD1-CORT	812	-0.0070667	0.98386
APLF	803	-0.236932	0.57952
APLN	807	-0.338992	0.45815
APLNR	809	-0.307832	0.49223
APLP1	802	-0.201135	0.62931
APLP2	808	-0.828976	0.14826
APMAP	797	-0.633988	0.23228
APOA1	817	-0.539072	0.28902
APOA1BP	818	-1.43916	0.036378
APOA2	819	-0.157503	0.69582
APOA4	820	-0.432045	0.36979
APOA5	821	-0.507268	0.31098
APOB	822	-0.112248	0.77224
APOBEC1	823	-0.504497	0.31297
APOBEC2	824	-0.941916	0.11431
APOBEC3A	825	-1.20737	0.062034
APOBEC3A_B	826	-0.274227	0.53183
APOBEC3B	827	-0.299331	0.50196
APOBEC3C	828	-0.153514	0.70224
APOBEC3D	829	-0.263396	0.54526
APOBEC3F	830	-0.407313	0.39146
APOBEC3G	831	-0.0851863	0.82189
APOBEC3H	832	-0.103281	0.78835
APOBEC4	833	-0.426455	0.37458
APOBR	834	-0.412558	0.38676
APOC1	835	-0.110525	0.77531
APOC2	836	-0.409537	0.38946
APOC3	837	-1.26549	0.054264
APOC4	838	-0.0863663	0.81966
APOD	839	-1.21185	0.061398
APOE	840	-0.265144	0.54307
APOF	841	-0.0784904	0.83466
APOH	842	-0.647528	0.22515
APOL1	843	-0.256718	0.55371
APOL2	844	-0.369715	0.42686
APOL3	845	-0.124858	0.75014
APOL4	846	-0.220404	0.602
APOL5	847	-0.666795	0.21538
APOL6	848	-0.105429	0.78446
APOLD1	849	-1.69969	0.019967
APOM	850	-0.547845	0.28324
APOO	851	-0.0623267	0.86631
APOOL	852	-0.975843	0.10572
APOPT1	853	-0.875985	0.13305
APP	854	-1.67356	0.021205
APPBP2	855	-0.520842	0.30141
APPL1	856	-0.0304117	0.93237
APPL2	857	-0.185593	0.65224
APRT	858	-0.0923844	0.80838
APTX	859	-0.887261	0.12964
AQP1	860	-0.258683	0.55121
AQP10	861	-0.623752	0.23782
AQP11	862	-0.11413	0.7689
AQP12B	863	-0.282055	0.52233
AQP2	864	-0.220476	0.6019
AQP3	865	-0.827222	0.14886
AQP4	866	-0.27137	0.53534
AQP5	867	-0.0538328	0.88342
AQP6	868	-0.536316	0.29086
AQP7	869	-0.0871458	0.81819
AQP8	870	-0.338254	0.45893
AQP9	871	-0.17848	0.66301
AQPEP	872	-0.0989615	0.79623
AQR	873	-0.0579225	0.87514
AR	874	-0.512409	0.30732
ARAF	875	-0.625453	0.23689
ARAP1	876	-0.41838	0.38161
ARAP2	877	-0.180522	0.6599
ARAP3	879	-0.165268	0.68349
ARC	878	-0.309795	0.49001
ARCN1	880	-1.6669	0.021533
AREG	881	-0.0427759	0.9062
AREL1	882	-0.226352	0.59381
ARF1	883	-0.182243	0.65729
ARF3	884	-0.2728	0.53358
ARF4	885	-0.309733	0.49008
ARF5	886	-0.252573	0.55902
ARF6	887	-0.0210438	0.9527
ARFGAP1	888	-0.385936	0.41121
ARFGAP2	889	-0.0391821	0.91373
ARFGAP3	890	-0.0805819	0.83065
ARFGEF1	891	-0.656119	0.22074
ARFGEF2	892	-1.01981	0.095541
ARFIP1	893	-0.840824	0.14427
ARFIP2	894	-0.468815	0.33977
ARFRP1	895	-0.0636622	0.86365
ARG1	896	-0.768378	0.17046
ARG2	897	-0.639634	0.22928
ARGFX	898	-0.509129	0.30965
ARGLU1	899	-0.209778	0.61691
ARHGAP1	900	-0.986194	0.10323
ARHGAP10	901	-1.2004	0.063037
ARHGAP11A	902	-0.944928	0.11352
ARHGAP11B	903	-0.0154997	0.96494
ARHGAP12	904	-0.144154	0.71754
ARHGAP15	905	-0.587288	0.25865
ARHGAP17	906	-0.0359856	0.92048
ARHGAP18	907	-1.14275	0.071986
ARHGAP19	908	-1.75007	0.01778
ARHGAP20	909	-0.0515968	0.88798
ARHGAP21	910	-0.025797	0.94233
ARHGAP22	911	-0.315424	0.4837
ARHGAP23	912	-1.56529	0.027209
ARHGAP24	913	-0.792635	0.1612
ARHGAP25	914	-0.330702	0.46698
ARHGAP26	915	-0.0155762	0.96477
ARHGAP27	916	-0.0575554	0.87588
ARHGAP28	917	-0.17512	0.66816
ARHGAP29	918	-0.377869	0.41892
ARHGAP30	919	-0.126377	0.74752
ARHGAP31	920	-0.0317319	0.92954
ARHGAP32	921	-0.83109	0.14754
ARHGAP33	922	-1.3327	0.046484
ARHGAP35	923	-0.121053	0.75674
ARHGAP36	924	-0.181286	0.65874
ARHGAP39	925	-0.577541	0.26452
ARHGAP4	926	-0.434188	0.36797
ARHGAP40	927	-0.0739098	0.84351
ARHGAP44	928	-0.831679	0.14734
ARHGAP5	929	-0.135934	0.73125
ARHGAP6	930	-0.490408	0.32329
ARHGAP8	931	-0.133606	0.73518
ARHGAP9	932	-1.02118	0.095241
ARHGDIA	933	-0.207391	0.62031
ARHGDIB	934	-0.380635	0.41626
ARHGDIG	939	-0.0737605	0.8438
ARHGEF1	935	-0.75654	0.17517
ARHGEF10	937	-0.65912	0.21922
ARHGEF10L	938	-0.368343	0.42821
ARHGEF11	936	-0.130569	0.74034
ARHGEF12	940	-0.710902	0.19458
ARHGEF15	941	-0.231073	0.58739
ARHGEF16	942	-0.15082	0.70661
ARHGEF17	943	-0.688988	0.20465
ARHGEF18	944	-0.233059	0.58471
ARHGEF19	945	-0.0572382	0.87652
ARHGEF2	946	-0.113137	0.77066
ARHGEF25	947	-0.230003	0.58884
ARHGEF26	948	-0.0415221	0.90882
ARHGEF28	949	-0.424362	0.37639
ARHGEF3	950	-0.443854	0.35987
ARHGEF33	951	-0.958213	0.1101
ARHGEF35	952	-1.37098	0.042562
ARHGEF37	953	-0.273713	0.53246
ARHGEF38	954	-0.326472	0.47155
ARHGEF39	955	-0.568926	0.26982
ARHGEF4	956	-0.380375	0.41651
ARHGEF40	957	-0.279089	0.52591
ARHGEF5	958	-0.319139	0.47958
ARHGEF6	959	-0.0804042	0.83099
ARHGEF7	960	-0.275568	0.53019
ARHGEF9	961	-0.359946	0.43657
ARID1A	962	-0.373547	0.42311
ARID1B	963	-1.58399	0.026062
ARID2	987	-0.173718	0.67032
ARID3A	971	-0.101692	0.79124
ARID3B	992	-0.263205	0.5455
ARID3C	966	-0.108859	0.77829
ARID4A	993	-0.168565	0.67832
ARID4B	984	-0.0070667	0.98386
ARID5A	964	-0.196919	0.63545
ARID5B	965	-0.356074	0.44048
ARIH1	982	-0.617911	0.24104
ARIH2	975	-0.42237	0.37812
ARIH2OS	991	-0.610002	0.24547
ARL1	978	-0.306423	0.49383
ARL10	989	-0.428186	0.37309
ARL11	977	-0.262132	0.54685
ARL13A	968	-0.859586	0.13817
ARL13B	967	-0.268629	0.53873
ARL14	994	-0.770753	0.16953
ARL14EP	986	-0.268307	0.53913
ARL14EPL	972	-0.405364	0.39322
ARL15	976	-0.64321	0.2274
ARL16	983	-0.132014	0.73788
ARL17A	974	-0.429971	0.37156
ARL17B	969	-0.128906	0.74318
ARL2	970	-0.0244166	0.94533
ARL2BP	985	-0.670358	0.21362
ARL3	990	-0.890084	0.1288
ARL4A	979	-1.30064	0.050045
ARL4C	988	-1.46033	0.034647
ARL4D	981	-0.840403	0.14441
ARL5A	973	-0.0487791	0.89376
ARL5B	980	-0.382958	0.41404
ARL5C	995	-0.452262	0.35297
ARL6	996	-0.283229	0.52092
ARL6IP1	997	-0.221892	0.59994
ARL6IP5	998	-0.643611	0.22719
ARL6IP6	999	-2.08725	0.00818
ARL8A	1000	-0.400641	0.39752
ARL8B	1001	-1.81386	0.015351
ARL9	1002	-0.12354	0.75242
ARMC1	1003	-0.377527	0.41925
ARMC10	1004	-0.178218	0.66341
ARMC12	1005	-0.224623	0.59618
ARMC2	1006	-0.927971	0.11804
ARMC3	1007	-0.758752	0.17428
ARMC4	1008	-0.111832	0.77298
ARMC5	1009	-0.395396	0.40235
ARMC6	1010	-0.228677	0.59064
ARMC7	1011	-0.208864	0.61821
ARMC8	1012	-0.233513	0.5841
ARMC9	1013	-0.195806	0.63708
ARMCX1	1014	-0.236535	0.58005
ARMCX2	1015	-0.593494	0.25498
ARMCX3	1016	-0.142734	0.71989
ARMCX4	1017	-1.15424	0.070106
ARMCX5	1018	-0.562789	0.27366
ARMCX5-GPRASP2	1019	-0.444362	0.35945
ARMCX6	1020	-0.127162	0.74617
ARMS2	1021	-0.675779	0.21097
ARNT	1022	-0.209159	0.61779
ARNT2	1023	-0.0782043	0.83521
ARNTL	1024	-1.58508	0.025997
ARNTL2	1025	-0.448867	0.35574
ARPC1A	1026	-0.732969	0.18494
ARPC1B	1029	-1.12818	0.074443
ARPC2	1028	-0.209891	0.61675
ARPC3	1031	-0.761728	0.17309
ARPC4	1030	-0.302135	0.49873
ARPC4-TTLL3	1032	-0.408435	0.39045
ARPC5	1027	-0.333229	0.46427
ARPC5L	1033	-0.534245	0.29225
ARPP19	1034	-0.769756	0.16992
ARPP21	1035	-0.203162	0.62638
ARR3	1036	-0.101209	0.79212
ARRB1	1037	-0.292379	0.51006
ARRB2	1038	-0.809949	0.1549
ARRDC1	1040	-0.357555	0.43898
ARRDC2	1039	-0.388691	0.40861
ARRDC3	1041	-0.233364	0.5843
ARRDC4	1042	-0.166012	0.68232
ARRDC5	1043	-0.0286221	0.93622
ARSA	1044	-0.732195	0.18527
ARSB	1045	-0.151675	0.70522
ARSD	1046	-0.0070667	0.98386
ARSE	1047	-0.220202	0.60228
ARSF	1048	-0.0185121	0.95827
ARSG	1049	-0.310931	0.48873
ARSH	1050	-0.50819	0.31032
ARSI	1051	-0.184011	0.65462
ARSJ	1052	-0.0189928	0.95721
ARSK	1053	-0.18964	0.64619
ART1	1054	-0.699709	0.19966
ART3	1055	-0.186719	0.65055
ART4	1056	-0.227326	0.59248
ART5	1057	-0.124672	0.75046
ARTN	1058	-0.226543	0.59355
ARV1	1059	-0.853934	0.13998
ARVCF	1060	-0.204781	0.62405
ARX	1061	-0.20716	0.62064
AS3MT	1062	-0.135786	0.7315
ASAH1	1063	-0.126784	0.74682
ASAH2	1064	-0.0993052	0.7956
ASAH2B	1065	-0.0232787	0.94781
ASAP1	1066	-0.172372	0.6724
ASAP2	1067	-0.89279	0.128
ASAP3	1068	-0.197651	0.63438
ASB1	1069	-0.330293	0.46742
ASB10	1070	-0.828274	0.1485
ASB11	1071	-0.776972	0.16712
ASB12	1072	-0.400444	0.3977
ASB13	1073	-0.59346	0.255
ASB14	1074	-0.336224	0.46108
ASB15	1075	-0.346074	0.45074
ASB16	1076	-0.418301	0.38168
ASB17	1077	-0.2967	0.50501
ASB18	1078	-0.152884	0.70326
ASB2	1079	-0.018698	0.95786
ASB3	1080	-0.419623	0.38052
ASB4	1081	-0.547324	0.28358
ASB5	1082	-0.403689	0.39474
ASB6	1083	-0.111759	0.77311
ASB7	1084	-0.152995	0.70308
ASB8	1085	-0.366219	0.43031
ASB9	1086	-0.0070667	0.98386
ASCC1	1087	-0.153867	0.70167
ASCC2	1088	-0.289722	0.51319
ASCC3	1089	-0.338841	0.45831
ASCL1	1090	-1.2884	0.051475
ASCL2	1091	-0.184037	0.65458
ASCL3	1092	-0.109501	0.77714
ASCL4	1093	-0.548935	0.28253
ASCL5	1094	-0.0225462	0.94941
ASF1A	1095	-0.205944	0.62238
ASF1B	1096	-0.547861	0.28323
ASGR1	1097	-0.132403	0.73722
ASGR2	1098	-0.517241	0.30392
ASH1L	1099	-0.394598	0.40309
ASH2L	1100	-0.02702	0.93968
ASIC1	1101	-0.0331218	0.92657
ASIC2	1102	-0.0405388	0.91088
ASIC3	1103	-0.981424	0.10437
ASIC4	1104	-0.113532	0.76996
ASIC5	1105	-0.521852	0.30071
ASIP	1106	-0.123921	0.75176
ASL	1107	-0.231229	0.58718
ASMT_X	1108	-0.535138	0.29165
ASMT_Y	1109	-0.0070667	0.98386
ASMTL_X	1110	-0.538727	0.28925
ASMTL_Y	1111	-0.0070667	0.98386
ASNA1	1113	-0.230903	0.58762
ASNS	1112	-2.0467	0.0089805
ASNSD1	1114	-0.684051	0.20699
ASPA	1115	-0.807823	0.15566
ASPDH	1116	-0.155175	0.69956
ASPG	1117	-0.0412355	0.90942
ASPH	1118	-0.0177514	0.95995
ASPHD1	1119	-1.74912	0.017819
ASPHD2	1120	-0.863089	0.13706
ASPM	1121	-0.693403	0.20258
ASPRV1	1122	-0.0217967	0.95105
ASPSCR1	1123	-0.275364	0.53044
ASRGL1	1124	-0.459946	0.34678
ASS1	1125	-0.0565203	0.87797
ASTE1	1126	-0.217527	0.606
ASTL	1127	-0.157216	0.69628
ASTN1	1128	-0.450519	0.35439
ASTN2	1129	-1.52181	0.030074
ASUN	1130	-0.971022	0.1069
ASXL1	1131	-0.0922502	0.80863
ASXL2	1132	-0.0190381	0.95711
ASXL3	1133	-0.0979155	0.79815
ASZ1	1134	-0.175269	0.66793
ATAD1	1135	-1.16559	0.068299
ATAD2	1136	-0.0070667	0.98386
ATAD2B	1137	-0.209771	0.61692
ATAD3A	1138	-0.116089	0.76544
ATAD3B	1139	-1.72545	0.018817
ATAD3C	1140	-1.69375	0.020242
ATAD5	1141	-0.0537148	0.88366
ATAT1	1142	-0.241603	0.57332
ATCAY	1145	-2.09778	0.007984
ATE1	1146	-0.363823	0.43269
ATF1	1143	-0.173666	0.6704
ATF2	1144	-0.0896745	0.81344
ATF3	1147	-0.0573968	0.8762
ATF4	1148	-0.121174	0.75653
ATF5	1149	-0.219784	0.60286
ATF6	1150	-0.0517338	0.8877
ATF6B	1151	-1.06332	0.086433
ATF7	1152	-0.383409	0.41361
ATF7IP	1153	-0.342275	0.4547
ATF7IP2	1154	-0.517126	0.304
ATG10	1155	-0.595389	0.25387
ATG12	1156	-0.226002	0.59429
ATG13	1157	-0.379583	0.41727
ATG14	1158	-0.0357357	0.92101
ATG16L1	1159	-0.327754	0.47016
ATG16L2	1160	-0.500285	0.31602
ATG2A	1161	-0.0989015	0.79634
ATG2B	1162	-0.159016	0.6934
ATG3	1163	-1.37535	0.042136
ATG4A	1164	-0.0304164	0.93236
ATG4B	1165	-0.196372	0.63625
ATG4C	1166	-0.527214	0.29702
ATG4D	1167	-0.306484	0.49376
ATG5	1168	-0.10666	0.78224
ATG7	1169	-0.746129	0.17942
ATG9A	1170	-0.228471	0.59092
ATHL1	1171	-0.68569	0.20621
ATIC	1172	-0.0936488	0.80603
ATL1	1173	-0.113972	0.76918
ATL2	1174	-0.69118	0.20362
ATL3	1175	-0.246356	0.56708
ATM	1176	-0.544637	0.28534
ATMIN	1177	-0.39392	0.40372
ATN1	1178	-0.537962	0.28976
ATOH1	1179	-0.0934387	0.80642
ATOH7	1180	-0.96722	0.10784
ATOH8	1181	-0.087337	0.81783
ATOX1	1182	-1.41034	0.038874
ATP10A	1183	-0.145069	0.71603
ATP10B	1184	-0.439555	0.36345
ATP10D	1185	-0.205317	0.62328
ATP11A	1186	-0.0183626	0.9586
ATP11B	1187	-0.100946	0.7926
ATP11C	1188	-0.180463	0.65999
ATP12A	1189	-0.587623	0.25845
ATP13A1	1190	-0.306299	0.49397
ATP13A2	1191	-0.693789	0.2024
ATP13A3	1192	-0.225709	0.59469
ATP13A4	1193	-0.255895	0.55476
ATP13A5	1194	-0.409481	0.38951
ATP1A1	1195	-1.46828	0.034019
ATP1A2	1196	-0.285586	0.5181
ATP1A3	1197	-0.13676	0.72986
ATP1A4	1198	-0.0070667	0.98386
ATP1B1	1199	-0.456888	0.34923
ATP1B2	1200	-0.0978883	0.7982
ATP1B3	1201	-0.519892	0.30207
ATP1B4	1202	-0.132733	0.73666
ATP2A1	1203	-0.368353	0.4282
ATP2A2	1204	-0.0341354	0.92441
ATP2A3	1205	-0.116543	0.76464
ATP2B1	1206	-6.6258	2.367e-07
ATP2B2	1207	-1.05118	0.088883
ATP2B3	1208	-0.845698	0.14266
ATP2B4	1209	-0.0324801	0.92794
ATP2C1	1210	-0.107466	0.78079
ATP2C2	1211	-0.0570103	0.87698
ATP4A	1212	-0.0487694	0.89378
ATP4B	1213	-0.870471	0.13475
ATP5A1	1214	-0.305097	0.49534
ATP5B	1215	-1.01384	0.096863
ATP5C1	1216	-0.644127	0.22692
ATP5D	1217	-0.4292	0.37222
ATP5E	1218	-0.220829	0.60141
ATP5F1	1219	-0.0746621	0.84205
ATP5G1	1220	-0.208555	0.61865
ATP5G2	1221	-0.139782	0.7248
ATP5G3	1222	-0.40392	0.39453
ATP5H	1223	-0.039691	0.91266
ATP5I	1224	-0.021856	0.95092
ATP5J	1225	-0.279254	0.52571
ATP5J2	1226	-0.125373	0.74925
ATP5J2-PTCD1	1227	-0.401823	0.39644
ATP5L	1228	-0.641741	0.22817
ATP5L2	1229	-0.24102	0.57409
ATP5O	1230	-0.0381614	0.91588
ATP5S	1231	-0.746953	0.17908
ATP5SL	1232	-0.396055	0.40174
ATP6AP1	1233	-0.370754	0.42584
ATP6AP1L	1234	-0.0240859	0.94605
ATP6AP2	1235	-0.0070667	0.98386
ATP6V0A1	1236	-0.136635	0.73007
ATP6V0A2	1237	-0.519447	0.30238
ATP6V0A4	1238	-0.0256956	0.94255
ATP6V0B	1239	-0.143374	0.71883
ATP6V0C	1241	-0.0792247	0.83325
ATP6V0D1	1240	-0.0070667	0.98386
ATP6V0D2	1242	-1.60031	0.025101
ATP6V0E1	1243	-0.583659	0.26082
ATP6V0E2	1244	-1.30505	0.049539
ATP6V1A	1245	-0.309565	0.49027
ATP6V1B1	1246	-0.125478	0.74907
ATP6V1B2	1247	-0.633036	0.23279
ATP6V1C1	1248	-0.438934	0.36397
ATP6V1C2	1249	-0.151608	0.70533
ATP6V1D	1250	-0.739833	0.18204
ATP6V1E1	1251	-0.786031	0.16367
ATP6V1E2	1252	-0.396077	0.40172
ATP6V1F	1253	-1.34318	0.045375
ATP6V1G1	1254	-0.0793863	0.83294
ATP6V1G2	1255	-0.996023	0.10092
ATP6V1G3	1256	-0.341302	0.45572
ATP6V1H	1257	-0.4755	0.33458
ATP7A	1258	-0.934495	0.11628
ATP7B	1259	-1.04519	0.090118
ATP8A1	1260	-0.838482	0.14505
ATP8A2	1261	-0.0471495	0.89712
ATP8B1	1262	-0.0070667	0.98386
ATP8B2	1263	-0.557505	0.27701
ATP8B3	1264	-1.01249	0.097166
ATP8B4	1265	-0.742321	0.181
ATP9A	1266	-0.667299	0.21513
ATP9B	1267	-0.325736	0.47235
ATPAF1	1270	-0.171817	0.67326
ATPAF2	1268	-0.104616	0.78593
ATPBD4	1269	-0.481552	0.32995
ATPIF1	1271	-0.0070667	0.98386
ATR	1272	-0.265977	0.54203
ATRAID	1273	-0.18504	0.65307
ATRIP	1274	-0.780861	0.16563
ATRN	1275	-0.480211	0.33097
ATRNL1	1276	-0.17579	0.66713
ATRX	1277	-0.572433	0.26765
ATXN1	1278	-1.65679	0.02204
ATXN10	1279	-0.244445	0.56958
ATXN1L	1280	-1.12616	0.07479
ATXN2	1281	-0.197603	0.63445
ATXN2L	1282	-0.124036	0.75156
ATXN3	1283	-0.959714	0.10972
ATXN3L	1284	-0.288075	0.51514
ATXN7	1285	-0.876671	0.13284
ATXN7L1	1286	-0.402393	0.39592
ATXN7L2	1287	-2.45166	0.0035346
ATXN7L3	1288	-0.125599	0.74886
ATXN7L3B	1289	-0.345881	0.45094
AUH	1290	-0.832653	0.14701
AUNIP	1291	-0.0793237	0.83306
AUP1	1292	-0.113645	0.76976
AURKA	1293	-0.266033	0.54196
AURKAIP1	1294	-0.632048	0.23332
AURKB	1295	-0.290951	0.51174
AURKC	1296	-0.952102	0.11166
AUTS2	1297	-1.06431	0.086237
AVEN	1298	-0.391838	0.40566
AVIL	1299	-1.35086	0.04458
AVL9	1300	-1.20433	0.06247
AVP	1301	-0.165115	0.68373
AVPI1	1302	-2.24323	0.0057117
AVPR1A	1303	-0.437077	0.36553
AVPR1B	1304	-0.422164	0.3783
AVPR2	1305	-0.176806	0.66557
AWAT1	1312	-0.6311	0.23383
AWAT2	1336	-0.490892	0.32293
AXDND1	1338	-1.14949	0.070878
AXIN1	1315	-0.0605157	0.86993
AXIN2	1340	-0.581599	0.26206
AXL	1331	-0.571557	0.26819
AZGP1	1329	-0.785845	0.16374
AZI1	1342	-0.292345	0.5101
AZI2	1322	-0.825824	0.14934
AZIN1	1326	-0.798111	0.15918
AZU1	1316	-0.380677	0.41622
B2M	1320	-0.258848	0.551
B3GALNT1	1317	-0.64216	0.22795
B3GALNT2	1343	-0.719968	0.19056
B3GALT1	1321	-0.205115	0.62357
B3GALT2	1323	-0.607162	0.24708
B3GALT4	1335	-0.899733	0.12597
B3GALT5	1314	-0.320436	0.47815
B3GALT6	1339	-0.169758	0.67646
B3GALTL	1333	-0.171308	0.67405
B3GAT1	1330	-0.365644	0.43088
B3GAT2	1337	-0.0631044	0.86476
B3GAT3	1332	-0.116089	0.76544
B3GNT1	1308	-0.119718	0.75907
B3GNT2	1327	-0.723217	0.18914
B3GNT3	1307	-0.46353	0.34393
B3GNT4	1319	-0.410385	0.3887
B3GNT5	1324	-0.750704	0.17754
B3GNT6	1306	-0.581202	0.2623
B3GNT7	1334	-0.567239	0.27087
B3GNT8	1309	-1.29708	0.050457
B3GNT9	1318	-0.671763	0.21293
B3GNTL1	1310	-0.547478	0.28348
B4GALNT1	1325	-0.0673436	0.85636
B4GALNT2	1341	-0.280785	0.52386
B4GALNT3	1328	-0.064392	0.8622
B4GALNT4	1311	-0.31054	0.48917
B4GALT1	1313	-0.362881	0.43363
B4GALT2	1344	-0.705556	0.19699
B4GALT3	1345	-0.552656	0.28012
B4GALT4	1346	-1.14433	0.071725
B4GALT5	1347	-0.467042	0.34116
B4GALT6	1348	-0.093541	0.80623
B4GALT7	1349	-0.367877	0.42867
B9D1	1350	-0.504275	0.31313
B9D2	1351	-0.472538	0.33687
BAALC	1352	-0.11426	0.76867
BAAT	1353	-0.876867	0.13278
BABAM1	1354	-0.155374	0.69924
BACE1	1355	-1.74829	0.017853
BACE2	1356	-0.545186	0.28498
BACH1	1357	-0.0070667	0.98386
BACH2	1358	-0.0847849	0.82265
BAD	1359	-0.223074	0.59831
BAG1	1360	-0.377496	0.41928
BAG2	1361	-0.855581	0.13945
BAG3	1362	-0.626463	0.23634
BAG4	1363	-0.674874	0.21141
BAG5	1364	-0.649035	0.22437
BAG6	1365	-0.054827	0.8814
BAGE	1366	-0.284548	0.51934
BAGE2	1367	-0.794282	0.16059
BAGE3	1368	-0.822204	0.15059
BAGE4	1369	-0.0070667	0.98386
BAGE5	1370	-0.0070667	0.98386
BAHCC1	1371	-0.0323023	0.92832
BAHD1	1372	-0.373393	0.42326
BAI1	1373	-0.0195239	0.95604
BAI2	1374	-0.241224	0.57382
BAI3	1375	-0.0981495	0.79772
BAIAP2	1376	-0.0588863	0.8732
BAIAP2L1	1377	-0.136172	0.73085
BAIAP2L2	1378	-0.167817	0.67949
BAIAP3	1379	-0.276323	0.52927
BAK1	1380	-0.26967	0.53744
BAMBI	1381	-0.471984	0.3373
BANF1	1382	-0.412042	0.38722
BANF2	1383	-1.71066	0.019469
BANK1	1384	-0.0197784	0.95548
BANP	1385	-0.411616	0.3876
BAP1	1386	-0.319483	0.4792
BARD1	1387	-0.30011	0.50106
BARHL1	1388	-0.0751317	0.84114
BARHL2	1389	-0.218834	0.60418
BARX1	1390	-0.320318	0.47828
BARX2	1391	-0.174743	0.66874
BASP1	1392	-0.146204	0.71416
BATF	1393	-0.1418	0.72144
BATF2	1395	-0.252161	0.55955
BATF3	1394	-0.171862	0.67319
BAX	1396	-0.660151	0.2187
BAZ1A	1397	-0.245445	0.56827
BAZ1B	1398	-0.292898	0.50945
BAZ2A	1399	-0.0681456	0.85478
BAZ2B	1400	-1.25093	0.056114
BBC3	1401	-0.218037	0.60529
BBIP1	1402	-0.126139	0.74793
BBOX1	1403	-1.09844	0.079719
BBS1	1404	-0.283487	0.52061
BBS10	1405	-0.774794	0.16796
BBS12	1406	-0.893639	0.12775
BBS2	1407	-0.618993	0.24044
BBS4	1408	-0.173802	0.67019
BBS5	1409	-0.0278574	0.93787
BBS7	1410	-0.984682	0.10359
BBS9	1411	-0.0219656	0.95068
BBX	1412	-0.328577	0.46927
BCAM	1413	-0.334128	0.46331
BCAN	1414	-0.068232	0.85461
BCAP29	1415	-0.0401147	0.91177
BCAP31	1417	-0.126215	0.7478
BCAR1	1416	-0.426885	0.37421
BCAR3	1418	-1.36776	0.042879
BCAS1	1419	-0.499695	0.31645
BCAS2	1420	-0.249175	0.56341
BCAS3	1421	-0.0434954	0.9047
BCAS4	1422	-0.0365427	0.9193
BCAT1	1423	-0.032176	0.92859
BCAT2	1424	-0.135269	0.73237
BCCIP	1425	-0.28682	0.51663
BCDIN3D	1426	-0.108775	0.77844
BCHE	1427	-0.0262258	0.9414
BCKDHA	1428	-0.5366	0.29067
BCKDHB	1429	-0.0471011	0.89722
BCKDK	1430	-0.627972	0.23552
BCL10	1431	-1.12491	0.075005
BCL11A	1432	-0.510196	0.30889
BCL11B	1433	-0.227121	0.59276
BCL2	1434	-0.0796523	0.83243
BCL2A1	1436	-0.164341	0.68495
BCL2L1	1435	-0.251486	0.56042
BCL2L10	1437	-0.125414	0.74918
BCL2L11	1439	-0.725935	0.18796
BCL2L12	1438	-0.596056	0.25348
BCL2L13	1440	-0.296958	0.50471
BCL2L14	1441	-0.451083	0.35393
BCL2L15	1442	-0.37056	0.42603
BCL2L2	1443	-0.0501174	0.89101
BCL2L2-PABPN1	1444	-0.0423017	0.90719
BCL3	1445	-1.14568	0.071502
BCL6	1446	-0.631955	0.23337
BCL6B	1447	-0.619789	0.24
BCL7A	1448	-1.23651	0.058008
BCL7B	1449	-0.515558	0.3051
BCL7C	1450	-0.0315918	0.92984
BCL9	1451	-1.3348	0.046259
BCL9L	1452	-0.275233	0.5306
BCLAF1	1453	-0.0593192	0.87233
BCMO1	1454	-0.665164	0.21619
BCO2	1455	-0.205554	0.62294
BCOR	1456	-0.900768	0.12567
BCORL1	1457	-0.0299415	0.93338
BCR	1458	-0.324387	0.47382
BCS1L	1459	-0.0484391	0.89446
BDH1	1460	-0.199503	0.63168
BDH2	1461	-0.266385	0.54152
BDKRB1	1462	-0.442986	0.36059
BDKRB2	1463	-0.338528	0.45864
BDNF	1464	-0.881173	0.13147
BDP1	1465	-0.151349	0.70575
BEAN1	1466	-0.509704	0.30924
BECN1	1467	-0.293897	0.50828
BEGAIN	1468	-0.893333	0.12784
BEND2	1469	-0.411583	0.38763
BEND3	1470	-0.402272	0.39603
BEND4	1471	-0.176213	0.66648
BEND5	1472	-0.380489	0.4164
BEND6	1473	-0.620694	0.2395
BEND7	1474	-0.0832882	0.82549
BEST1	1476	-0.03711	0.9181
BEST2	1475	-0.154505	0.70064
BEST3	1477	-0.0830462	0.82595
BEST4	1478	-0.63339	0.2326
BET1	1479	-0.714735	0.19287
BET1L	1480	-1.08206	0.082783
BET3L	1481	-0.288083	0.51513
BEX1	1482	-1.10464	0.078588
BEX2	1483	-0.127383	0.74579
BEX4	1484	-0.216632	0.60725
BEX5	1485	-2.99004	0.0010232
BFAR	1486	-0.144323	0.71726
BFSP1	1487	-0.356458	0.44009
BFSP2	1488	-0.739475	0.18219
BGLAP	1489	-0.52165	0.30085
BGN	1490	-1.43796	0.036479
BHLHA15	1491	-0.0608703	0.86922
BHLHA9	1492	-0.76566	0.17153
BHLHB9	1493	-0.125976	0.74821
BHLHE22	1494	-0.113413	0.77017
BHLHE40	1495	-0.222262	0.59943
BHLHE41	1496	-0.0070667	0.98386
BHMT	1497	-1.63956	0.022932
BHMT2	1498	-0.537183	0.29028
BICC1	1499	-0.0392677	0.91355
BICD1	1500	-0.121697	0.75562
BICD2	1501	-0.260001	0.54954
BID	1502	-0.416552	0.38322
BIK	1503	-0.178945	0.6623
BIN1	1504	-0.137952	0.72786
BIN2	1505	-0.111265	0.77399
BIN3	1506	-0.0617405	0.86748
BIRC2	1507	-0.196878	0.63551
BIRC3	1508	-0.117982	0.76211
BIRC5	1509	-0.396531	0.4013
BIRC6	1510	-2.13067	0.0074017
BIRC7	1511	-0.178054	0.66366
BIRC8	1512	-0.488799	0.32449
BIVM	1513	-0.499325	0.31672
BIVM-ERCC5	1514	-0.0431547	0.90541
BLCAP	1515	-0.501207	0.31535
BLID	1516	-0.124777	0.75028
BLK	1517	-0.874844	0.1334
BLM	1518	-0.816161	0.1527
BLMH	1520	-0.365956	0.43057
BLNK	1519	-0.124956	0.74997
BLOC1S1	1521	-0.457436	0.34879
BLOC1S2	1522	-0.905215	0.12439
BLOC1S3	1523	-0.537707	0.28993
BLOC1S4	1524	-0.208576	0.61862
BLOC1S5	1525	-0.480723	0.33058
BLOC1S6	1526	-0.428769	0.37259
BLVRA	1527	-1.57073	0.02687
BLVRB	1528	-0.220627	0.60169
BLZF1	1529	-0.136957	0.72953
BMF	1530	-0.233275	0.58442
BMI1	1531	-0.20108	0.62939
BMP1	1532	-0.475877	0.33429
BMP10	1533	-0.477191	0.33328
BMP15	1534	-0.495937	0.3192
BMP2	1535	-0.159994	0.69184
BMP2K	1536	-0.345689	0.45114
BMP3	1537	-0.321974	0.47646
BMP4	1538	-0.480316	0.33089
BMP5	1539	-0.497778	0.31785
BMP6	1540	-1.7743	0.016815
BMP7	1541	-0.63882	0.22971
BMP8A	1542	-0.218647	0.60444
BMP8B	1543	-0.354332	0.44225
BMPER	1544	-0.382863	0.41413
BMPR1A	1545	-0.280818	0.52382
BMPR1B	1546	-0.439054	0.36387
BMPR2	1547	-0.247398	0.56572
BMS1	1548	-0.924563	0.11897
BMX	1549	-0.0887838	0.81511
BNC1	1550	-0.0512741	0.88864
BNC2	1551	-0.543771	0.28591
BNIP1	1552	-0.668512	0.21453
BNIP2	1553	-0.541937	0.28712
BNIP3	1554	-0.267003	0.54075
BNIP3L	1555	-0.140597	0.72344
BNIPL	1556	-0.044168	0.9033
BOC	1557	-0.227708	0.59196
BOD1	1558	-0.808437	0.15544
BOD1L1	1559	-0.312284	0.48721
BOD1L2	1560	-0.853314	0.14018
BOK	1561	-0.0316618	0.92969
BOLA1	1562	-2.21946	0.0060331
BOLA2	1563	-0.451254	0.35379
BOLA2B	1564	-0.0070667	0.98386
BOLA3	1565	-0.0610202	0.86892
BOLL	1566	-0.129128	0.7428
BOP1	1567	-2.96051	0.0010952
BORA	1568	-0.140219	0.72407
BPGM	1569	-0.36518	0.43134
BPHL	1570	-0.511774	0.30777
BPI	1571	-0.151134	0.7061
BPIFA1	1572	-0.287115	0.51628
BPIFA2	1573	-0.230254	0.5885
BPIFA3	1574	-0.475604	0.3345
BPIFB1	1575	-0.245713	0.56792
BPIFB2	1576	-0.945923	0.11326
BPIFB3	1577	-0.121432	0.75608
BPIFB4	1578	-0.0441199	0.9034
BPIFB6	1579	-0.243973	0.5702
BPIFC	1580	-1.23848	0.057746
BPNT1	1581	-0.676583	0.21058
BPTF	1582	-0.998699	0.1003
BPY2	1583	-0.357061	0.43948
BPY2B	1584	-0.0070667	0.98386
BPY2C	1585	-0.53087	0.29453
BRAF	1586	-0.123869	0.75185
BRAP	1587	-0.106427	0.78266
BRAT1	1588	-0.165687	0.68283
BRCA1	1589	-0.53291	0.29315
BRCA2	1590	-0.435997	0.36644
BRCC3	1591	-0.963251	0.10883
BRD1	1592	-0.0827099	0.82659
BRD2	1593	-0.635543	0.23145
BRD3	1594	-0.483174	0.32872
BRD4	1596	-0.245774	0.56784
BRD7	1595	-1.37306	0.042358
BRD8	1597	-0.0948358	0.80383
BRD9	1598	-0.459846	0.34686
BRDT	1599	-0.156107	0.69806
BRE	1600	-0.593511	0.25497
BRF1	1601	-0.249152	0.56344
BRF2	1602	-0.0070667	0.98386
BRI3	1603	-0.141848	0.72136
BRI3BP	1604	-0.155442	0.69913
BRICD5	1606	-0.708365	0.19572
BRINP1	1605	-0.0337738	0.92518
BRINP2	1607	-0.351855	0.44478
BRINP3	1608	-0.283546	0.52054
BRIP1	1609	-0.531948	0.2938
BRIX1	1610	-0.0915364	0.80996
BRK1	1611	-0.0179595	0.95949
BRMS1	1612	-0.16577	0.6827
BRMS1L	1613	-0.0922126	0.8087
BROX	1614	-0.899871	0.12593
BRPF1	1615	-0.681332	0.20829
BRPF3	1616	-1.55286	0.027999
BRS3	1617	-0.238253	0.57776
BRSK1	1618	-0.564172	0.27279
BRSK2	1619	-0.13376	0.73492
BRWD1	1620	-0.482382	0.32932
BRWD3	1621	-0.39626	0.40155
BSCL2	1622	-0.29237	0.51007
BSDC1	1623	-0.539283	0.28888
BSG	1624	-0.403524	0.39489
BSN	1625	-0.121863	0.75533
BSND	1626	-0.306862	0.49333
BSPH1	1627	-0.691244	0.20359
BSPRY	1628	-0.901841	0.12536
BST1	1629	-0.437695	0.36501
BST2	1630	-0.0598722	0.87122
BSX	1631	-0.0606106	0.86974
BTAF1	1632	-0.519892	0.30207
BTBD1	1633	-2.26049	0.0054892
BTBD10	1635	-1.86848	0.013537
BTBD11	1640	-0.095555	0.8025
BTBD16	1636	-0.27511	0.53075
BTBD17	1638	-0.170825	0.6748
BTBD18	1637	-2.24823	0.0056464
BTBD2	1639	-0.0721576	0.84692
BTBD3	1634	-0.204113	0.62501
BTBD6	1641	-0.198795	0.63271
BTBD7	1642	-0.665727	0.21591
BTBD8	1643	-0.26883	0.53848
BTBD9	1644	-0.221704	0.6002
BTC	1645	-0.811803	0.15424
BTD	1646	-0.409158	0.3898
BTF3	1647	-0.356676	0.43987
BTF3L4	1648	-0.16405	0.68541
BTG1	1649	-0.148846	0.70983
BTG2	1650	-0.675471	0.21112
BTG3	1651	-0.206692	0.62131
BTG4	1652	-0.379926	0.41694
BTK	1653	-0.482052	0.32957
BTLA	1654	-0.256443	0.55406
BTN1A1	1655	-0.0231917	0.948
BTN2A1	1656	-0.203606	0.62574
BTN2A2	1658	-0.814713	0.15321
BTN3A1	1657	-2.58628	0.0025925
BTN3A2	1659	-0.39048	0.40693
BTN3A3	1660	-0.165439	0.68322
BTNL3	1661	-0.720995	0.19011
BTNL8	1662	-0.389979	0.4074
BTNL9	1664	-0.580061	0.26299
BTRC	1663	-0.2658	0.54225
BUB1	1665	-0.21044	0.61597
BUB1B	1666	-0.287098	0.5163
BUB3	1667	-0.360344	0.43617
BUD13	1668	-0.0387118	0.91472
BUD31	1669	-0.155858	0.69846
BVES	1670	-0.158609	0.69405
BYSL	1671	-0.221747	0.60014
BZRAP1	1672	-0.437552	0.36513
BZW1	1673	-0.642732	0.22765
BZW2	1674	-0.852262	0.14052
C10orf10	1675	-0.23297	0.58483
C10orf105	1676	-1.33103	0.046663
C10orf107	1677	-0.599324	0.25158
C10orf11	1678	-0.462798	0.34451
C10orf111	1679	-0.298942	0.50241
C10orf113	1680	-0.340302	0.45677
C10orf114	1681	-0.250426	0.56179
C10orf118	1682	-0.0849011	0.82243
C10orf12	1683	-0.651754	0.22297
C10orf120	1684	-0.939869	0.11485
C10orf128	1685	-0.049421	0.89244
C10orf129	1686	-0.272004	0.53456
C10orf131	1687	-1.45604	0.034991
C10orf137	1688	-0.063627	0.86372
C10orf2	1689	-1.02285	0.094875
C10orf25	1690	-0.170844	0.67477
C10orf32	1691	-0.531195	0.29431
C10orf35	1692	-0.556033	0.27795
C10orf53	1693	-0.661603	0.21797
C10orf54	1694	-0.897601	0.12659
C10orf55	1695	-0.169552	0.67678
C10orf62	1696	-0.12256	0.75412
C10orf67	1697	-0.624757	0.23727
C10orf68	1698	-2.55001	0.0028183
C10orf71	1699	-0.776063	0.16747
C10orf76	1700	-0.371029	0.42557
C10orf82	1701	-0.55519	0.27849
C10orf88	1702	-0.227788	0.59185
C10orf90	1703	-0.590659	0.25665
C10orf91	1704	-0.524256	0.29905
C10orf95	1705	-0.0398576	0.91231
C10orf99	1706	-0.642237	0.22791
C11orf1	1707	-0.0176971	0.96007
C11orf16	1708	-0.0982911	0.79746
C11orf21	1709	-0.532806	0.29322
C11orf24	1710	-0.159154	0.69318
C11orf30	1711	-0.171359	0.67397
C11orf31	1712	-1.61633	0.024192
C11orf35	1713	-0.339467	0.45765
C11orf40	1714	-0.877653	0.13254
C11orf42	1715	-0.0646137	0.86176
C11orf45	1716	-0.329049	0.46876
C11orf48	1717	-0.0963024	0.80112
C11orf49	1718	-0.0470962	0.89723
C11orf52	1719	-0.525915	0.29791
C11orf53	1720	-0.38123	0.41569
C11orf54	1721	-0.963651	0.10873
C11orf57	1722	-0.354814	0.44176
C11orf58	1723	-0.0316899	0.92963
C11orf63	1724	-0.658229	0.21967
C11orf65	1725	-0.681937	0.208
C11orf68	1726	-0.695574	0.20157
C11orf70	1727	-0.938623	0.11518
C11orf71	1728	-1.73105	0.018576
C11orf73	1729	-0.242422	0.57224
C11orf74	1731	-0.307982	0.49206
C11orf80	1730	-0.037181	0.91795
C11orf82	1733	-0.873252	0.13389
C11orf83	1732	-0.398646	0.39935
C11orf84	1735	-0.937155	0.11557
C11orf85	1734	-0.0458106	0.89989
C11orf86	1736	-0.0267151	0.94034
C11orf87	1737	-0.409448	0.38954
C11orf88	1738	-1.10792	0.077997
C11orf91	1739	-0.069433	0.85225
C11orf93	1740	-0.163967	0.68554
C11orf94	1741	-0.184774	0.65347
C11orf96	1742	-0.0170778	0.96144
C12orf10	1743	-0.925915	0.1186
C12orf23	1744	-0.015977	0.96388
C12orf29	1745	-0.0959881	0.8017
C12orf39	1746	-0.984263	0.10369
C12orf4	1747	-0.583226	0.26108
C12orf40	1748	-0.617677	0.24117
C12orf42	1749	-0.150022	0.70791
C12orf43	1750	-0.0223495	0.94984
C12orf44	1751	-0.251618	0.56025
C12orf45	1752	-0.410162	0.3889
C12orf49	1753	-1.15341	0.070241
C12orf5	1754	-0.463997	0.34356
C12orf50	1755	-0.0337691	0.92519
C12orf52	1756	-1.10911	0.077784
C12orf54	1757	-0.482923	0.32891
C12orf56	1758	-0.0226514	0.94918
C12orf57	1759	-0.206231	0.62197
C12orf60	1760	-0.747851	0.17871
C12orf61	1761	-2.12575	0.007486
C12orf65	1762	-0.631936	0.23338
C12orf66	1763	-0.266065	0.54192
C12orf68	1764	-1.67079	0.021341
C12orf71	1765	-0.653745	0.22195
C12orf73	1766	-0.191701	0.64313
C12orf74	1767	-0.0328453	0.92716
C12orf75	1768	-0.346479	0.45032
C12orf76	1769	-0.158547	0.69415
C12orf77	1770	-0.309848	0.48995
C12orf79	1771	-0.675944	0.21089
C13orf35	1772	-1.68918	0.020456
C13orf45	1773	-0.871116	0.13455
C14orf1	1774	-0.029695	0.93391
C14orf105	1775	-0.660409	0.21857
C14orf119	1776	-0.0753745	0.84067
C14orf132	1777	-0.559201	0.27593
C14orf142	1778	-0.313471	0.48588
C14orf159	1779	-0.467857	0.34052
C14orf166	1780	-0.163271	0.68664
C14orf166B	1781	-1.06956	0.085201
C14orf169	1782	-0.126348	0.74757
C14orf177	1783	-1.29428	0.050783
C14orf178	1784	-2.2035	0.006259
C14orf180	1785	-2.03901	0.009141
C14orf182	1786	-1.33506	0.046232
C14orf183	1787	-2.20875	0.0061837
C14orf2	1788	-0.23498	0.58213
C14orf28	1789	-0.0164684	0.96279
C14orf37	1790	-0.128707	0.74352
C14orf39	1791	-1.05716	0.087667
C14orf79	1792	-0.216418	0.60755
C14orf80	1793	-0.359509	0.43701
C14orf93	1794	-0.312123	0.48739
C15orf26	1795	-0.0301928	0.93284
C15orf27	1796	-0.302849	0.49791
C15orf32	1797	-0.410889	0.38825
C15orf38	1798	-1.16368	0.0686
C15orf38-AP3S2	1799	-0.994048	0.10138
C15orf39	1800	-0.388425	0.40886
C15orf40	1801	-0.204662	0.62422
C15orf41	1802	-0.658368	0.2196
C15orf43	1803	-0.167664	0.67973
C15orf48	1804	-0.123205	0.753
C15orf52	1805	-0.0617956	0.86737
C15orf53	1806	-0.185326	0.65264
C15orf54	1807	-0.933898	0.11644
C15orf56	1808	-0.447149	0.35715
C15orf57	1809	-0.698406	0.20026
C15orf59	1810	-1.14082	0.072307
C15orf60	1811	-1.39401	0.040364
C15orf61	1812	-0.454285	0.35133
C15orf62	1813	-0.531062	0.2944
C15orf65	1814	-0.353185	0.44342
C16orf11	1815	-0.0420385	0.90774
C16orf13	1816	-0.0512057	0.88878
C16orf3	1817	-0.311438	0.48816
C16orf45	1818	-0.256639	0.55381
C16orf46	1819	-0.0070667	0.98386
C16orf52	1820	-0.190407	0.64505
C16orf54	1821	-0.494552	0.32022
C16orf55	1822	-0.662281	0.21763
C16orf58	1823	-0.145809	0.71481
C16orf59	1824	-0.21283	0.61259
C16orf62	1825	-0.0912041	0.81058
C16orf70	1826	-0.512339	0.30737
C16orf71	1827	-0.854555	0.13978
C16orf72	1828	-0.021436	0.95184
C16orf74	1829	-0.0569905	0.87702
C16orf78	1830	-0.239178	0.57653
C16orf80	1831	-0.105009	0.78522
C16orf86	1832	-0.254714	0.55627
C16orf87	1833	-0.651481	0.22311
C16orf89	1834	-0.122059	0.75499
C16orf90	1835	-1.15246	0.070395
C16orf92	1836	-0.278041	0.52718
C16orf93	1837	-0.0963078	0.80111
C16orf95	1838	-0.219827	0.6028
C16orf96	1839	-1.0852	0.082187
C16orf97	1840	-0.679459	0.20919
C17orf100	1841	-0.0561594	0.8787
C17orf102	1842	-0.106438	0.78264
C17orf104	1843	-0.334597	0.46281
C17orf105	1844	-1.0316	0.092982
C17orf107	1845	-0.105235	0.78481
C17orf112	1846	-0.0279731	0.93762
C17orf47	1847	-0.0511715	0.88885
C17orf49	1848	-0.0999225	0.79447
C17orf50	1850	-1.46423	0.034338
C17orf51	1851	-0.11081	0.7748
C17orf53	1849	-0.0192923	0.95655
C17orf58	1852	-0.367431	0.42911
C17orf59	1853	-0.103584	0.7878
C17orf62	1854	-0.462546	0.34471
C17orf64	1855	-0.148289	0.71074
C17orf66	1857	-0.53288	0.29317
C17orf70	1856	-0.157915	0.69516
C17orf72	1858	-0.148369	0.71061
C17orf74	1859	-0.0767249	0.83806
C17orf75	1860	-0.105745	0.78389
C17orf77	1861	-0.370254	0.42633
C17orf78	1862	-0.737953	0.18283
C17orf80	1863	-0.143809	0.71811
C17orf82	1864	-0.20695	0.62094
C17orf85	1865	-0.887831	0.12947
C17orf89	1866	-0.582645	0.26143
C17orf96	1867	-1.23749	0.057878
C17orf97	1868	-0.12575	0.7486
C17orf98	1869	-1.42436	0.037639
C17orf99	1870	-0.353263	0.44334
C18orf21	1871	-0.234756	0.58243
C18orf25	1872	-0.0505075	0.89021
C18orf32	1873	-0.0823422	0.82729
C18orf42	1874	-0.78704	0.16329
C18orf54	1875	-0.83354	0.14671
C18orf63	1876	-0.249831	0.56256
C18orf8	1877	-0.739857	0.18203
C19orf10	1878	-0.569844	0.26925
C19orf12	1879	-0.068883	0.85333
C19orf18	1880	-1.0018	0.099586
C19orf21	1881	-0.290662	0.51208
C19orf24	1882	-0.533355	0.29285
C19orf25	1883	-0.458259	0.34813
C19orf26	1884	-0.190413	0.64504
C19orf33	1885	-0.754339	0.17606
C19orf35	1886	-0.236392	0.58024
C19orf38	1887	-0.542815	0.28654
C19orf40	1888	-0.673623	0.21202
C19orf43	1889	-0.212079	0.61365
C19orf44	1890	-0.647489	0.22517
C19orf45	1891	-0.0937889	0.80577
C19orf47	1892	-0.799779	0.15857
C19orf48	1893	-0.249283	0.56327
C19orf52	1894	-0.276676	0.52884
C19orf53	1895	-0.696092	0.20133
C19orf54	1896	-0.0666798	0.85767
C19orf57	1897	-0.161308	0.68975
C19orf59	1898	-0.680249	0.20881
C19orf60	1899	-0.101302	0.79195
C19orf66	1900	-0.630191	0.23432
C19orf67	1901	-0.154127	0.70125
C19orf70	1902	-0.565591	0.2719
C19orf71	1903	-0.443842	0.35988
C19orf73	1904	-0.628083	0.23546
C19orf77	1905	-0.812592	0.15396
C19orf80	1906	-0.304046	0.49654
C19orf81	1907	-1.55791	0.027675
C19orf82	1908	-0.565367	0.27204
C1D	1909	-0.63257	0.23304
C1GALT1	1910	-0.492427	0.32179
C1GALT1C1	1911	-0.238283	0.57772
C1orf100	1912	-1.11147	0.077363
C1orf101	1913	-1.11864	0.076095
C1orf105	1914	-1.0662	0.085861
C1orf106	1915	-0.333819	0.46364
C1orf109	1916	-0.0534986	0.8841
C1orf110	1917	-0.331232	0.46641
C1orf111	1918	-0.578742	0.26379
C1orf112	1919	-0.294632	0.50742
C1orf115	1920	-0.24849	0.5643
C1orf116	1921	-0.0962482	0.80122
C1orf122	1922	-0.723791	0.18889
C1orf123	1923	-0.0705351	0.85009
C1orf127	1926	-0.88114	0.13148
C1orf131	1925	-0.170118	0.6759
C1orf141	1924	-0.939378	0.11498
C1orf146	1927	-0.0674096	0.85623
C1orf151-NBL1	1928	-0.165147	0.68368
C1orf158	1929	-0.734145	0.18444
C1orf159	1930	-0.396033	0.40176
C1orf162	1931	-0.0805872	0.83064
C1orf168	1932	-0.153712	0.70192
C1orf172	1933	-0.141469	0.72199
C1orf173	1934	-0.887395	0.1296
C1orf174	1935	-0.045854	0.8998
C1orf177	1936	-0.804128	0.15699
C1orf185	1938	-0.556283	0.27779
C1orf186	1937	-0.555658	0.27819
C1orf189	1939	-0.0217784	0.95109
C1orf192	1940	-0.0318347	0.92932
C1orf194	1941	-0.222327	0.59934
C1orf198	1942	-0.673275	0.21219
C1orf204	1943	-0.0981495	0.79772
C1orf21	1944	-0.146636	0.71345
C1orf210	1945	-0.9914	0.102
C1orf216	1946	-0.796016	0.15995
C1orf226	1947	-1.10009	0.079416
C1orf227	1948	-0.232592	0.58534
C1orf228	1949	-2.46977	0.0033902
C1orf229	1950	-0.188499	0.64789
C1orf233	1951	-0.274162	0.53191
C1orf234	1952	-0.384513	0.41256
C1orf27	1953	-0.0384176	0.91534
C1orf35	1954	-0.0256495	0.94265
C1orf43	1955	-0.547907	0.2832
C1orf50	1956	-0.0151173	0.96579
C1orf51	1957	-0.0575108	0.87597
C1orf52	1958	-0.0433898	0.90492
C1orf53	1959	-0.530811	0.29457
C1orf54	1960	-1.02069	0.095348
C1orf56	1961	-0.223313	0.59798
C1orf61	1962	-0.868413	0.13539
C1orf63	1963	-0.0679272	0.85521
C1orf64	1964	-0.0306167	0.93193
C1orf65	1965	-1.10908	0.07779
C1orf68	1966	-0.265072	0.54316
C1orf74	1967	-0.177459	0.66457
C1orf85	1968	-0.445596	0.35843
C1orf86	1969	-0.119415	0.7596
C1orf87	1970	-1.27287	0.05335
C1orf94	1971	-0.588919	0.25768
C1orf95	1972	-0.0752505	0.84091
C1QA	1973	-0.386962	0.41024
C1QB	1974	-0.336685	0.46059
C1QBP	1975	-0.626867	0.23612
C1QC	1976	-0.0070667	0.98386
C1QL1	1977	-0.197609	0.63444
C1QL2	1978	-0.596536	0.2532
C1QL3	1979	-0.169456	0.67693
C1QL4	1980	-0.412514	0.3868
C1QTNF1	1981	-0.374461	0.42222
C1QTNF2	1982	-0.214585	0.61012
C1QTNF3	1983	-0.91421	0.12184
C1QTNF4	1984	-0.222457	0.59916
C1QTNF5	1985	-0.885189	0.13026
C1QTNF6	1986	-0.231199	0.58722
C1QTNF7	1987	-0.111433	0.77369
C1QTNF8	1988	-0.508176	0.31033
C1QTNF9	1989	-0.152471	0.70393
C1QTNF9B	1990	-0.145002	0.71614
C1QTNF9B-AS1	1991	-0.30666	0.49356
C1R	1992	-0.240091	0.57532
C1RL	1993	-0.216382	0.6076
C1S	1994	-0.343739	0.45317
C2	1995	-0.406836	0.39189
C20orf111	1996	-0.297535	0.50404
C20orf112	1997	-0.153317	0.70256
C20orf141	1998	-0.339286	0.45784
C20orf144	1999	-0.329235	0.46856
C20orf166	2000	-0.187923	0.64875
[truncated: 18,915 more rows]

## Sheet: Top p<0.01
SCAP	6	1	0.98386	0.983863	20255	0	1.55e-17	2.37e-07	0.00099	1	6
ATP2B1	6	1	0.98386	0.983863	20239	0	5.08e-17	2.37e-07	0.00099	2	6
SGMS1	6	1	0.96773	0.983863	20237	0	1.62e-13	2.37e-07	0.00099	3	6
SREBF2	6	1	0.98386	0.983863	20238	0	1.85e-10	2.37e-07	0.00099	4	4
MBTPS1	6	0.18377	0.3162	0.983863	6645	1	1.35e-07	2.37e-07	0.00099	5	2
MBTPS2	6	0.18009	0.31155	0.983863	6536	2	1.17e-05	3.43e-05	0.119637	6	4
hsa-mir-450a-2	4	0.99997	0.96769	0.983863	20233	0	3.44e-05	8.31e-05	0.248232	7	3
PIGU	6	0.98341	0.95179	0.983863	19878	0	7.67e-05	0.00018107	0.473391	8	3
SLC25A51	6	0.99986	0.96759	0.983863	20231	0	0.0001425	0.00034723	0.640677	9	2
SPPL3	6	0.36626	0.49946	0.983863	10489	1	0.00014536	0.00035386	0.640677	10	2
CBY1	6	0.087271	0.17972	0.983863	3808	1	0.00014683	0.00035575	0.640677	11	3
VPS45	6	0.9577	0.92721	0.983863	19373	0	0.00015407	0.00036759	0.640677	12	2
EFNB2	6	0.91017	0.88511	0.983863	18517	1	0.0001866	0.00044002	0.707921	13	3
RBM26	6	0.042293	0.098106	0.968208	2117	3	0.00022392	0.0005347	0.785149	14	2
ANO1	6	0.59956	0.67165	0.983863	14041	1	0.00023811	0.0005631	0.785149	15	2
PDHB	6	0.19022	0.32408	0.983863	6793	2	0.00028289	0.00065257	0.834708	16	2
RNF170	6	0.81614	0.81385	0.983863	17022	1	0.00030646	0.0007018	0.834708	17	1
MAGEL2	6	0.31534	0.45711	0.983863	9631	1	0.00031338	0.00071837	0.834708	18	3
CD109	6	0.78654	0.7934	0.983863	16560	1	0.0003536	0.00080216	0.883012	19	1
DMRTA1	6	0.90475	0.88054	0.983863	18435	0	0.00039675	0.00089731	0.938366	20	2
BEX5	6	0.60353	0.67422	0.983863	14090	1	0.00045813	0.0010232	0.983863	21	2
BOP1	6	0.087008	0.1793	0.983863	3793	2	0.00049502	0.0010952	0.983863	22	1
TELO2	6	0.70598	0.74169	0.983863	15461	1	0.00068356	0.0014644	0.983863	23	1
ADM2	6	0.9993	0.96706	0.983863	20224	0	0.00069943	0.0014891	0.983863	24	1
HYDIN	6	0.061684	0.13629	0.978713	2910	1	0.00080144	0.0016808	0.983863	25	1
GOLPH3	6	0.83714	0.82854	0.983863	17324	1	0.00084808	0.0017783	0.983863	26	2
ESX1	6	0.98058	0.94904	0.983863	19813	0	0.00087286	0.0018261	0.983863	27	2
NAE1	6	0.9432	0.91383	0.983863	19089	0	0.0008957	0.001863	0.983863	28	1
ABCE1	6	0.79546	0.7996	0.983863	16712	1	0.00090495	0.0018758	0.983863	29	2
RNF151	6	0.66861	0.71775	0.983863	14987	1	0.0009192	0.0019028	0.983863	30	1
KIAA0825	6	0.33566	0.47415	0.983863	9939	2	0.001039	0.0021139	0.983863	31	2
ZRANB3	6	0.43203	0.55358	0.983863	11589	2	0.0010903	0.0022048	0.983863	32	2
OPA3	6	0.99888	0.96666	0.983863	20214	0	0.0011203	0.0022654	0.983863	33	2
FOXD4L5	6	0.34596	0.48282	0.983863	10122	2	0.0011205	0.0022659	0.983863	34	2
MFNG	6	0.6589	0.71113	0.983863	14840	1	0.0012195	0.0024552	0.983863	35	2
RBM41	6	0.99877	0.96655	0.983863	20209	0	0.0012338	0.0024761	0.983863	36	1
WDR37	6	0.93548	0.9069	0.983863	18954	0	0.0012413	0.002486	0.983863	37	1
CNBD2	6	0.5064	0.61311	0.983863	12821	1	0.001296	0.0025774	0.983863	38	1
BTN3A1	6	0.99185	0.95986	0.983863	20053	0	0.0013041	0.0025925	0.983863	39	1
C8orf42	6	0.99865	0.96644	0.983863	20206	0	0.001351	0.0026721	0.983863	40	2
EDA	6	0.89913	0.87596	0.983863	18332	0	0.001367	0.0027033	0.983863	41	1
hsa-mir-892a	4	0.99703	0.96486	0.983863	20171	0	0.001374	0.0027156	0.983863	42	2
PTPRQ	6	0.18455	0.31718	0.983863	6665	2	0.0013904	0.002745	0.983863	43	1
hsa-mir-4257	4	0.12906	0.24554	0.983863	5162	1	0.0014298	0.0028117	0.983863	44	1
C10orf68	6	0.41544	0.54004	0.983863	11311	2	0.0014328	0.0028183	0.983863	45	2
FIBIN	6	0.99443	0.96236	0.983863	20120	0	0.0014375	0.0028245	0.983863	46	1
MAEA	6	0.7645	0.77854	0.983863	16232	2	0.001453	0.0028501	0.983863	47	1
FA2H	6	0.99849	0.9663	0.983863	20204	0	0.0015066	0.0029528	0.983863	48	2
hsa-mir-10b	4	0.95693	0.92652	0.983863	19353	0	0.0015554	0.0030385	0.983863	49	1
PPAP2C	6	0.28526	0.42836	0.983863	9048	3	0.0015677	0.0030621	0.983863	50	2
AKR1E2	6	0.97976	0.94823	0.983863	19795	0	0.001612	0.0031393	0.983863	51	2
PRR13	6	0.99837	0.96618	0.983863	20201	0	0.0016268	0.0031691	0.983863	52	1
hsa-mir-125b-1	4	0.99834	0.96615	0.983863	20200	0	0.0016565	0.0032273	0.983863	53	2
SALL4	6	0.42937	0.55139	0.983863	11546	2	0.001673	0.0032562	0.983863	54	1
hsa-mir-606	4	0.99828	0.96609	0.983863	20198	0	0.0017172	0.0033353	0.983863	55	2
C4orf27	6	0.54432	0.63646	0.983863	13293	2	0.0017278	0.0033519	0.983863	56	1
hsa-mir-3127	4	0.99827	0.96608	0.983863	20197	0	0.0017329	0.0033604	0.983863	57	2
HLTF	6	0.68684	0.73023	0.983863	15261	1	0.0017439	0.0033741	0.983863	58	1
hsa-mir-1250	4	0.99825	0.96606	0.983863	20196	0	0.0017473	0.0033836	0.983863	59	2
C1orf228	6	0.93173	0.90358	0.983863	18878	0	0.0017505	0.0033902	0.983863	60	2
OXNAD1	6	0.85348	0.8404	0.983863	17578	1	0.001755	0.0033978	0.983863	61	2
NABP1	6	0.68301	0.72758	0.983863	15208	1	0.0017672	0.0034172	0.983863	62	1
ATXN7L2	6	0.99817	0.96598	0.983863	20194	0	0.0018311	0.0035346	0.983863	63	1
ZNF517	6	0.86635	0.85003	0.983863	17795	1	0.0018466	0.0035654	0.983863	64	2
hsa-mir-1323	4	0.26952	0.41298	0.983863	8696	1	0.0018829	0.0036259	0.983863	65	2
CTLA4	6	0.92923	0.90144	0.983863	18834	1	0.0019348	0.0037178	0.983863	66	2
LAIR2	6	0.13507	0.25353	0.983863	5329	1	0.0019637	0.0037604	0.983863	67	1
ZCCHC18	6	0.14947	0.27236	0.983863	5752	2	0.0019789	0.0037864	0.983863	68	1
TTC34	6	0.48634	0.59797	0.983863	12507	1	0.0020027	0.003829	0.983863	69	2
KIAA0754	6	0.90782	0.88311	0.983863	18488	0	0.002078	0.0039602	0.983863	70	2
GK	6	0.14985	0.27287	0.983863	5758	2	0.0021045	0.0040066	0.983863	71	1
TMEM241	6	0.031374	0.075466	0.949677	1658	3	0.0021673	0.0041164	0.983863	72	1
MIA3	6	0.62015	0.68506	0.983863	14302	1	0.0022464	0.0042603	0.983863	73	1
ANG	6	0.78849	0.7947	0.983863	16594	0	0.0022778	0.0043015	0.983863	74	1
HOXB6	6	0.99768	0.96549	0.983863	20184	0	0.0023185	0.0043706	0.983863	75	2
CCDC127	6	0.92636	0.89886	0.983863	18784	0	0.0023624	0.0044402	0.983863	76	2
KAT8	6	0.31307	0.4552	0.983863	9589	2	0.0023793	0.0044724	0.983863	77	1
ZNF460	6	0.77093	0.78274	0.983863	16319	0	0.0024033	0.0045131	0.983863	78	1
VPS25	6	0.25116	0.39486	0.983863	8312	1	0.0024183	0.004533	0.983863	79	1
NPSR1	6	0.97095	0.93974	0.983863	19627	0	0.0024264	0.0045434	0.983863	80	1
FOXP2	6	0.90043	0.87704	0.983863	18354	1	0.0024682	0.0046272	0.983863	81	2
MOXD1	6	0.68277	0.72741	0.983863	15205	2	0.0025438	0.0047436	0.983863	82	1
KCNE1	6	0.33516	0.47372	0.983863	9929	1	0.0025503	0.0047479	0.983863	83	2
HIST1H2AJ	6	0.43297	0.55429	0.983863	11606	1	0.0026231	0.0048667	0.983863	84	1
NAT8L	6	0.20884	0.34601	0.983863	7279	1	0.002662	0.0049268	0.983863	85	2
CKM	6	0.90875	0.8839	0.983863	18499	0	0.00285	0.0052184	0.983863	86	1
OR5B3	6	0.24011	0.38246	0.983863	8058	3	0.0028652	0.0052383	0.983863	87	1
HBQ1	6	0.86273	0.84722	0.983863	17732	1	0.0028785	0.0052587	0.983863	88	2
TAF3	6	0.48731	0.59878	0.983863	12521	2	0.0029026	0.005297	0.983863	89	2
hsa-mir-887	4	0.99704	0.96487	0.983863	20172	0	0.0029628	0.0053822	0.983863	90	1
C7orf65	6	0.67184	0.71994	0.983863	15043	1	0.0029674	0.005386	0.983863	91	2
CARD10	6	0.80618	0.80699	0.983863	16869	1	0.0029935	0.0054196	0.983863	92	2
BTBD1	6	0.11093	0.21804	0.983863	4564	1	0.0030457	0.0054892	0.983863	93	1
PMEL	6	0.93495	0.90642	0.983863	18943	1	0.0030575	0.0055129	0.983863	94	2
POC5	6	0.69764	0.73664	0.983863	15378	1	0.0031324	0.0056284	0.983863	95	1
BTBD18	6	0.39578	0.52372	0.983863	10994	2	0.0031448	0.0056464	0.983863	96	2
DFNA5	6	0.94884	0.91913	0.983863	19196	0	0.0031742	0.0056847	0.983863	97	2
LAPTM5	6	0.80903	0.80895	0.983863	16913	1	0.0031794	0.0056918	0.983863	98	1
AVPI1	6	0.98492	0.95324	0.983863	19903	0	0.0031889	0.0057117	0.983863	99	2
EMC1	6	0.89993	0.87663	0.983863	18345	1	0.0032206	0.0057586	0.983863	100	2
CTXN3	6	0.9189	0.89242	0.983863	18668	0	0.0032735	0.0058433	0.983863	101	1
C2CD4C	6	0.42692	0.54941	0.983863	11506	2	0.0033206	0.0059153	0.983863	102	1
hsa-mir-509-1	4	0.99475	0.96267	0.983863	20126	0	0.0033272	0.0059262	0.983863	103	2
C7orf31	6	0.99901	0.96679	0.983863	20216	0	0.0033502	0.005964	0.983863	104	2
PTPRC	6	0.19789	0.33318	0.983863	6984	2	0.0033593	0.0059754	0.983863	105	2
BOLA1	6	0.95851	0.92795	0.983863	19383	0	0.0033997	0.0060331	0.983863	106	2
AAK1	6	0.13532	0.25384	0.983863	5338	1	0.0034214	0.006062	0.983863	107	2
LTBP1	6	0.74385	0.76526	0.983863	15949	1	0.003422	0.0060625	0.983863	108	1
hsa-mir-124-2	4	0.86453	0.84859	0.983863	17763	0	0.0034392	0.0060885	0.983863	109	1
C14orf183	6	0.44803	0.56665	0.983863	11855	2	0.0035088	0.0061837	0.983863	110	1
C14orf178	6	0.78971	0.79556	0.983863	16620	1	0.0035558	0.006259	0.983863	111	1
CNGA4	6	0.99313	0.96112	0.983863	20084	0	0.0035767	0.0062945	0.983863	112	2
ABCA1	6	0.9361	0.90744	0.983863	18965	1	0.0036101	0.006347	0.983863	113	1
OAS2	6	0.57511	0.656	0.983863	13680	1	0.0036266	0.006365	0.983863	114	2
ANO6	6	0.978	0.94653	0.983863	19755	0	0.0036499	0.0064005	0.983863	115	1
OR52I2	6	0.40654	0.53267	0.983863	11166	2	0.0036728	0.0064374	0.983863	116	1
LPAR1	6	0.11659	0.22692	0.983863	4746	1	0.0037274	0.0065198	0.983863	117	1
ADPGK	6	0.15834	0.28393	0.983863	6001	1	0.0037355	0.0065312	0.983863	118	1
GCLM	6	0.15532	0.27994	0.983863	5915	1	0.0039303	0.0068365	0.983863	119	2
GLS	6	0.34137	0.47902	0.983863	10034	1	0.0039791	0.0069103	0.983863	120	1
OCLN	6	0.31812	0.45944	0.983863	9674	1	0.004004	0.006943	0.983863	121	1
FAM198B	6	0.4442	0.56344	0.983863	11795	2	0.0040261	0.0069761	0.983863	122	1
hsa-mir-133a-2	4	0.97663	0.9452	0.983863	19730	0	0.0040353	0.0069927	0.983863	123	1
TMEM204	6	0.92098	0.89421	0.983863	18705	1	0.004049	0.007015	0.983863	124	1
hsa-mir-4270	4	0.95856	0.928	0.983863	19384	0	0.0040667	0.0070434	0.983863	125	1
PSMB2	6	0.098824	0.1986	0.983863	4187	2	0.0040732	0.0070533	0.983863	126	1
PPP1R3C	6	0.44125	0.56102	0.983863	11751	1	0.0041191	0.0071153	0.983863	127	1
ZNF596	6	0.89246	0.87062	0.983863	18218	0	0.0041202	0.0071167	0.983863	128	1
TAGAP	6	0.49881	0.60823	0.983863	12715	3	0.004187	0.0072256	0.983863	129	2
DSG3	6	0.49613	0.60599	0.983863	12670	1	0.0042613	0.0073359	0.983863	130	1
ABHD17B	6	0.63889	0.69749	0.983863	14576	1	0.0042839	0.0073681	0.983863	131	2
BIRC6	6	0.9976	0.96542	0.983863	20179	0	0.0043083	0.0074017	0.983863	132	2
C12orf61	6	0.054603	0.12257	0.976591	2607	3	0.0043676	0.007486	0.983863	133	2
MID1	6	0.99674	0.96458	0.983863	20169	0	0.0044063	0.0075475	0.983863	134	2
TMEM184B	6	0.98807	0.95628	0.983863	19968	0	0.0044118	0.007557	0.983863	135	1
ZKSCAN5	6	0.27439	0.41777	0.983863	8791	2	0.0044323	0.0075901	0.983863	136	2
FNDC8	6	0.78138	0.78984	0.983863	16498	1	0.0044411	0.0076081	0.983863	137	2
SYCE3	6	0.99362	0.96159	0.983863	20099	0	0.0045006	0.0076962	0.983863	138	2
IGSF10	6	0.98046	0.94892	0.983863	19808	0	0.0046019	0.0078486	0.983863	139	2
PCDH8	6	0.85393	0.8407	0.983863	17583	1	0.004613	0.0078661	0.983863	140	1
PRMT2	6	0.73655	0.76058	0.983863	15853	1	0.0046374	0.0078959	0.983863	141	1
ZNF404	6	0.97735	0.94589	0.983863	19744	0	0.0046486	0.0079177	0.983863	142	2
LOC100129636	6	0.91405	0.88833	0.983863	18574	0	0.004656	0.0079277	0.983863	143	2
CSNK2A2	6	0.46506	0.58059	0.983863	12152	1	0.0046705	0.0079499	0.983863	144	2
ATCAY	6	0.99569	0.96355	0.983863	20145	0	0.004694	0.007984	0.983863	145	1
DGKG	6	0.00098709	0.0028212	0.79324	69	4	0.0048238	0.0081781	0.983863	146	1
ARL6IP6	6	0.49387	0.60415	0.983863	12636	2	0.0048254	0.00818	0.983863	147	1
HRH4	6	0.85032	0.83806	0.983863	17522	1	0.0049236	0.0083343	0.983863	148	2
FAM174A	6	0.019648	0.049049	0.923156	1101	3	0.0049804	0.0084119	0.983863	149	1
hsa-mir-3927	4	0.76152	0.77655	0.983863	16201	1	0.0050206	0.0084721	0.983863	150	2
NOC4L	6	0.47963	0.59248	0.983863	12394	1	0.005039	0.0084948	0.983863	151	1
CHCHD5	6	0.2001	0.33577	0.983863	7044	1	0.0050431	0.0085028	0.983863	152	2
CYP2R1	6	0.93996	0.91088	0.983863	19021	0	0.0050479	0.0085099	0.983863	153	2
C2orf70	6	0.50465	0.61206	0.983863	12797	2	0.0050515	0.0085151	0.983863	154	1
hsa-mir-3926-1	4	0.83351	0.82592	0.983863	17272	1	0.0051141	0.0086103	0.983863	155	1
HNF4A	6	0.61129	0.67928	0.983863	14183	2	0.0051369	0.0086415	0.983863	156	1
PASD1	6	0.76674	0.77997	0.983863	16268	1	0.0051767	0.0086983	0.983863	157	1
NDUFA8	6	0.99885	0.96663	0.983863	20213	0	0.0051831	0.0087092	0.983863	158	2
STAM2	6	0.92116	0.89437	0.983863	18709	0	0.0052271	0.0087793	0.983863	159	1
STEAP1	6	0.73564	0.76	0.983863	15843	1	0.0052656	0.0088337	0.983863	160	2
SLC38A8	6	0.42008	0.54382	0.983863	11393	1	0.0052898	0.0088806	0.983863	161	1
ASNS	6	0.96947	0.93832	0.983863	19593	0	0.0053525	0.0089805	0.983863	162	1
DCAF4L1	6	0.80739	0.80779	0.983863	16881	0	0.0053839	0.0090255	0.983863	163	1
PLXNA4	6	0.96386	0.93303	0.983863	19489	0	0.0053893	0.0090311	0.983863	164	1
IL10	6	0.97926	0.94775	0.983863	19782	0	0.0054059	0.0090567	0.983863	165	2
C14orf180	6	0.40312	0.52986	0.983863	11108	1	0.0054647	0.009141	0.983863	166	2
FAT2	6	0.87151	0.85399	0.983863	17886	1	0.0055353	0.0092456	0.983863	167	2
PRKAG2	6	0.27767	0.42098	0.983863	8876	1	0.0055432	0.0092565	0.983863	168	2
KCNN3	6	0.40437	0.53088	0.983863	11130	1	0.0055697	0.0092995	0.983863	169	2
ZNF257	6	0.68396	0.72823	0.983863	15221	2	0.0055768	0.009309	0.983863	170	2
CAPN8	5	0.0050134	0.013595	0.914126	310	1	0.0056102	0.0093649	0.983863	171	2
RGL2	6	0.006584	0.017595	0.916261	393	1	0.0056264	0.0093833	0.983863	172	2
RDH5	6	0.99437	0.96231	0.983863	20117	0	0.0056348	0.0093938	0.983863	173	1
NAPA	6	0.86068	0.84569	0.983863	17696	1	0.0056817	0.0094652	0.983863	174	2
TLR9	6	0.078573	0.16531	0.983863	3476	1	0.0057216	0.0095268	0.983863	175	2
NXPE4	6	0.93927	0.91025	0.983863	19006	0	0.0057296	0.0095391	0.983863	176	2
IQUB	6	0.09551	0.19324	0.983863	4084	2	0.0057402	0.0095575	0.983863	177	1
hsa-mir-4734	4	0.24791	0.39131	0.983863	8247	1	0.00576	0.0095836	0.983863	178	1
hsa-mir-7162	4	0.25008	0.39379	0.983863	8291	2	0.0057651	0.0095916	0.983863	179	1
HIST1H2AH	6	0.99416	0.96212	0.983863	20114	0	0.0058391	0.0097067	0.983863	180	1
DCBLD1	6	0.075153	0.15954	0.983863	3336	1	0.005859	0.0097389	0.983863	181	1
MGAT5B	6	0.12824	0.24445	0.983863	5141	2	0.005906	0.0098222	0.983863	182	1
CNTN6	6	0.99969	0.96743	0.983863	20229	0	0.0059719	0.0099235	0.983863	183	2

## Sheet: Top p<0.05
SCAP
ATP2B1
SGMS1
SREBF2
MBTPS1
MBTPS2
hsa-mir-450a-2
PIGU
SLC25A51
SPPL3
CBY1
VPS45
EFNB2
RBM26
ANO1
PDHB
RNF170
MAGEL2
CD109
DMRTA1
BEX5
BOP1
TELO2
ADM2
HYDIN
GOLPH3
ESX1
RNF151
NAE1
ABCE1
KIAA0825
ZRANB3
OPA3
FOXD4L5
RBM41
MFNG
WDR37
CNBD2
BTN3A1
C8orf42
EDA
hsa-mir-892a
PTPRQ
MAEA
hsa-mir-4257
C10orf68
FIBIN
FA2H
hsa-mir-10b
PPAP2C
AKR1E2
PRR13
hsa-mir-125b-1
SALL4
hsa-mir-606
hsa-mir-3127
HLTF
hsa-mir-1250
C4orf27
C1orf228
OXNAD1
NABP1
ATXN7L2
ZNF517
hsa-mir-1323
CTLA4
LAIR2
ZCCHC18
TTC34
KIAA0754
GK
TMEM241
MIA3
ANG
HOXB6
CCDC127
KAT8
ZNF460
NPSR1
VPS25
FOXP2
KCNE1
MOXD1
HIST1H2AJ
NAT8L
CKM
OR5B3
HBQ1
TAF3
C7orf65
hsa-mir-887
CARD10
BTBD1
PMEL
POC5
BTBD18
LAPTM5
DFNA5
AVPI1
EMC1
CTXN3
C2CD4C
PTPRC
hsa-mir-509-1
C7orf31
BOLA1
LTBP1
AAK1
hsa-mir-124-2
C14orf183
C14orf178
CNGA4
ABCA1
ANO6
OAS2
OR52I2
ADPGK
LPAR1
GCLM
OCLN
GLS
hsa-mir-133a-2
TMEM204
FAM198B
hsa-mir-4270
PSMB2
PPP1R3C
ZNF596
TAGAP
DSG3
ABHD17B
BIRC6
C12orf61
ZKSCAN5
MID1
FNDC8
TMEM184B
SYCE3
PCDH8
IGSF10
PRMT2
LOC100129636
ZNF404
CSNK2A2
ATCAY
DGKG
ARL6IP6
HRH4
FAM174A
C2orf70
hsa-mir-3927
CYP2R1
CHCHD5
NOC4L
hsa-mir-3926-1
HNF4A
NDUFA8
PASD1
STAM2
STEAP1
SLC38A8
ASNS
PLXNA4
DCAF4L1
IL10
C14orf180
FAT2
PRKAG2
ZNF257
KCNN3
CAPN8
RGL2
RDH5
NAPA
NXPE4
TLR9
hsa-mir-7162
IQUB
hsa-mir-4734
DCBLD1
HIST1H2AH
MGAT5B
CNTN6
hsa-mir-6132
ORAI3
IFITM1
PIFO
GPR113
IQSEC2
PTPN5
hsa-mir-6087
hsa-mir-3649
PGD
MOB3B
SRA1
hsa-mir-635
C6orf170
GPR33
STOML3
PTGDR
ZIC2
hsa-mir-550a-1
PNPLA8
RFPL4B
PIGQ
INPP4B
IFNA21
EFNA5
GRIN3B
IRF2
NEK8
GLUD2
DEPDC1
hsa-mir-6836
hsa-mir-4481
SUFU
PDLIM2
CCDC106
STRA6
GATAD1
TMEM30A
SCN3B
JMJD8
TICRR
GMEB1
DDAH2
TM4SF18
RAB40A
NAP1L1
MYEF2
FBXO24
MAGEB3
CLCA2
hsa-mir-320d-2
hsa-mir-4999
APBB3
KCTD8
hsa-mir-4754
KIF5B
FAM49B
CSNK1A1
hsa-mir-129-1
CHST1
PLCZ1
UGT3A2
DCAF8L1
FLRT2
hsa-mir-2277
CST11
HTR4
SLC43A1
FAM194B
BTBD10
DSCAM
MURC
hsa-mir-130a
CNTD2
SLC28A3
LRRC58
PAGE4
CAMK2D
LRRC57
KCNQ5
GPR132
TANGO6
CDCA7
ADCK5
IMPA1
GPR179
CRYM
TEKT1
TNNT2
DOM3Z
GALNT11
ENTPD7
SUPT3H
NOX3
ZFAT
SLIT3
GXYLT1
hsa-mir-4267
PTCD1
LGALS9B
CCDC89
CHRNA10
FBXL6
CYBA
TMED5
NAGLU
FOXC2
HAX1
FAM153A
hsa-mir-622
OR6C4
ARL8B
SULT1B1
GLRX3
GLT6D1
HTR2B
FAM72B
PDE1B
HAS3
hsa-mir-3673
OR5K1
DTNA
IFT27
PPP1R14B
KCNH4
TARSL2
DPEP3
TUT1
FAM160B2
SLCO6A1
GOLPH3L
hsa-mir-302c
PCDHGA6
NUTM2F
GRTP1
TULP2
PTP4A3
ZNF354C
AGAP11
GOLGA4
EFCAB6
RNFT2
PDE6D
KRTAP4-5
CMPK2
FAM219A
TAAR8
PRDM7
CCDC59
COX7A2L
KLHL17
hsa-mir-4650-1
BMP6
QRFPR
GPR125
hsa-mir-891a
RBM6
GLOD5
GOLM1
EFR3B
LPPR5
DNAJC7
EVA1C
ZC2HC1B
GATA6
ERN1
USP17L24
CYLC2
PSMD10
OAS3
PPP1R36
VAT1
ARHGAP19
IL17RD
ASPHD1
BACE1
HOXA4
AARSD1
HOOK2
DAW1
MYL7
hsa-mir-3621
CABS1
C8orf44
PCDHB1
FBXO45
PKLR
hsa-mir-7-2
STK11IP
VPS33A
FRMD1
JMY
KIAA1257
C11orf71
SAMD5
CLIC5
OLFM4
SELENBP1
ATAD3B
KRTAP16-1
ZBTB33
NKAIN2
PVRIG
IFI16
PDXP
FREM1
MED13L
PCDHB3
S100A14
BANF2
NOXO1
TRIM14
hsa-mir-3199-1
SPATA7
SLC6A6
GTF2F2
HEXA
TEX15
TRPC1
FAT4
POLDIP3
MIDN
ZFP41
MSL2
OARD1
APOLD1
SLFN5
E2F4
PLN
PLA2G4C
ATAD3C
PFDN2
DEGS1
ITGA2
PIK3R2
DYSF
C13orf35
DDAH1
ANKRD1
FAM76B
ZFYVE21
ELOVL2
CHRM2
CARD6
WFDC6
RFK
FAF1
APP
PCDHA5
PDZK1IP1
SYT6
ZNF33B
RPS6KA2
MYL12B
CCT3
RPS2
MFSD1
C12orf68
LRIG1
ALDH3A2
ARCN1
MS4A6A
ZNF267
ZFP62
SMARCA5
TMEM176B
C9orf169
GK5
MBNL2
UNKL
NLGN2
GDF11
SULT1E1
PPP1R16A
DRAM2
ATXN1
PSPC1
LATS1
COL5A1
AMFR
NUDT7
RIOK1
PLXNA3
ZDHHC2
MBOAT4
TMEM160
C4orf17
PRHOXNB
HABP4
MPC1L
OR13A1
KIR2DL4
SLC26A3
FAM110B
CDK2AP2
DNAJB2
CPED1
SPATA17
PMS1
BHMT
TMEM109
COQ4
HRSP12
USP43
MAPKAPK2
ULBP3
hsa-mir-154
CNGB1
MS4A7
CPSF3L
hsa-mir-106a
ANKRD13B
GPR142
KIFAP3
DAGLB
PPP1CA
FUCA2
PCSK1N
MPHOSPH6
PRRG4
APBB1
AP3S1
WDR92
C11orf31
SLC16A13
GMNC
HIF1AN
UTP11L
INTS4
CYTH3
KTN1
GPR3
FUBP3
S100A1
CCDC104
KIFC1
KIF4B
ATP6V0D2
MS4A5
hsa-mir-3682
CC2D2B
CMSS1
hsa-mir-4788
RSPH10B2
PDIK1L
TFR2
EXTL2
PIAS4
NKAIN3
PMPCB
C7orf57
SEC24A
PTPN1
CRYGN
KEAP1
SLC43A2
CCDC67
ARNTL
ARID1B
hsa-mir-4312
hsa-mir-215
C6orf226
CEP89
TRIM32
KLF5
MAGEB17
INO80
OR2L8
ALDH1A1
SLC35E3
PPP1R11
FIP1L1
DHTKD1
PDIA4
IFNLR1
KRBA1
SRRM4
hsa-mir-609
SLC15A3
OR13C5
BLVRA
FADD
hsa-mir-4308
ARHGAP23
SLTM
KRTAP10-5
AMELY
GPX6
OLA1
hsa-mir-5687
PSMG1
EIF3G
HTR3C
ADRA1A
C19orf81
hsa-mir-194-1
UBC
SAPCD1
OR2G2
CREB3L4
HOXD13
RUSC1
ANTXR1
SC5D
BRPF3
METTL3
TMPO
SSMEM1
SHROOM2
IL2RG
ITGB7
RUSC2
TMEM251
STK31
LCE3E
CRYL1
KCNA3
TNKS
PRDX3
AKR1A1
IDE
LYZL6
KLHL40
hsa-mir-562
RASGEF1A
PCSK9
hsa-mir-4509-1
PXDNL
CABP5
DIAPH3
CANT1
LILRA2
hsa-mir-3609
ASTN2
SLC22A13
FAM115A
YBX3
SPINK13
PVRL2
KCTD1
SFT2D1
NR1H2
OR2A4
MGST3
DCAF4L2
SNX10
MCRS1
KLHL32
CACNA1D
ABCA13
CHDC2
GIN1
ACAD10
PEX11A
SLC2A3
GPR107
SLC25A6_X
FANCD2
hsa-mir-7974
SMARCAL1
CEP192
GRXCR2
EFNB1
SCRN3
C6orf201
hsa-mir-147b
ZC3HAV1L
SNRNP27
UTP6
FOXP4
SERPINA11
NTN5
HOXD10
RAB10
LGALS1
ANGPTL4
PTGES3L-AARSD1
C7orf60
OAZ3
ZNF727
LYRM1
OR2L2
hsa-mir-518e
FILIP1L
NR2F2
GRK5
RNF125
NFKBIE
CPNE8
hsa-mir-592
SYPL1
STH
DCAF11
RBM33
MAML3
DGUOK
EXTL1
SDHAF2
GAPDH
NMNAT3
SYNCRIP
DNAJC10
LTBP2
MEP1A
ACSBG1
ATP1A1
SF3B1
EFCAB9
SH3GL3
C17orf50
ADAMTSL5
FAM175B
ABHD16B
CCL3L1
hsa-mir-526b
TCEB3
SIGLEC9
LRPAP1
OXSR1
SUPT4H1
OR2S2
ARL4C
C3orf37
OR6F1
SPANXN1
ZNF524
RAC1
RPL26
CRYGB
AHCYL1
PSAT1
LGR5
CCDC103
DHH
KIAA1551
DNAJB9
CLUL1
C10orf131
PCDH10
ADAM20
IL22RA1
RGS1
POMP
SLC14A2
MRPL30
PNMA1
PBX4
CEP128
hsa-mir-151a
CAMSAP3
hsa-mir-4740
SPATA31D3
GANAB
ANKRD11
RMI2
hsa-mir-5047
MKL1
EQTN
HOMEZ
ELL3
PIK3C3
APOA1BP
FAU
ZNF43
NFATC1
BGN
VCP
PPP1R7
GJB5
COX4I1
CD86
LOXL3
AKT3
C22orf43
DCAF6
ENOX1
TPP2
ACRV1
NDUFA4L2
CRYZL1
ZNF101
C17orf98
hsa-mir-323b
ENKD1
CIR1
S100B
ZBTB7C
ZC3H10
NPRL3
hsa-mir-4778
ALDH3A1
RIPK4
FERMT2
SLC25A15
hsa-mir-1285-2
hsa-mir-203b
DDX19B
hsa-mir-649
ICMT
ST6GALNAC4
CBR4
KIAA0355
UGT2B28
FAM57A
DNAJB7
PCBP4
CHMP4B
ZNF514
CETN3
ATOX1
ZDHHC1
CYTH4
GPR173
PDHX
CYP46A1
OR5M10
CP
WDR61
MLKL
OSGEP
hsa-mir-643
CLDN9
MMAB
TMEM87B
HNRNPD
FAT1
hsa-mir-4663
C2orf72
DPF2
STRIP2
KRTAP2-2
SPATA31D4
GLB1
RTL1
OPN4
OAZ2
KIF9
HCST
IPMK
MROH8
GALNTL6
KIAA1456
C15orf60
RGPD2
MARK2
HEPACAM2
GNB4
SGCG
PWP2
ZNF428
FRYL
CDC25C
hsa-mir-493
SLC25A3
POLR2K
TMEM67
UBE2D2
hsa-mir-4761
APEX2
hsa-mir-4727
SOX12
CLDN2
RASGRP2
CYP4F22
P4HTM
WDR74
GLG1
PRPH
PLOD1
TSPAN19
ATG3
ZNF30
hsa-mir-4451
CMTM7
SERPINA7
BRD7
SEC31A
ADAMTS10
ARHGEF35
ZNF326
HIST1H3C
PFKFB3
ADCYAP1
VTA1
DEFB112
ZNF570
EIF2AK1
OPN1LW
DOLPP1
BCAR3
RNF224
OSTC
PRSS3
OXLD1
TSC2
TEX11
HNRNPR
LSS
SIX1
ZSCAN2
SLC30A6
CHST9
PDIA3
SERPINB1
ABCA8
OC90
RPUSD1
KHDRBS2
KRTAP4-7
KRTAP10-2
PTPDC1
SLIT1
CEP78
SLC26A2
GNGT1
KCNMA1
SLC24A1
hsa-mir-4276
GMCL1
DSC2
hsa-mir-4482
hsa-mir-4421
RHBDL3
AVIL
GRIK1
EIF3E
CSB-PGBD3
CSRP2
USP4
RBBP6
GPR112
TMEM180
DUSP4
KIAA2022
TRIM27
ATP6V1F
MYOD1
TSNAX
WASF1
C2orf27B
GPBP1L1
CCL28
LOC100506422
ACTL6A
hsa-mir-30d
C2orf78
CRHR2
RIPK2
NMT1
C14orf182
LGALS8
C7orf66
TAF1D
SOCS1
MLIP
POMT2
VPS51
BCL9
STK35
PANX2
TAAR2
RBM18
UHRF1
C10orf105
MRE11A
ARHGAP33
ZDHHC3
HSPB6
G3BP1
NHP2L1
HADHA
PRM3
C2orf47
SMO
FEZF2
UNC5D
HLA-DOB
HOXB5
LEPROTL1
TRIM11
ZNF492
OR5H2
C6orf7
LHFPL3
SERPINE3
GEMIN4
STRBP
GREM2
C22orf46
MANSC1
PNMAL2
GTDC1
SMPDL3A
TWF2
hsa-mir-6715a
CUL2
TNRC18
ZNF76
AMBN
hsa-mir-6783
ABCC2
LIN7B
OR8K1
PTRHD1
MRPL32
CRYBB2
CPZ
STX11
ZNF816-ZNF321P
hsa-mir-548s
RCN1
GFRA2
OR10G3
EOGT
hsa-mir-3529
C20orf26
NLRP8
RSL1D1
ATP6V0E2
NOX5
PARVG
TXNIP
TM4SF19
MGAM
SEPT11
KIAA1210
hsa-mir-1283-1
CDHR3
MIPOL1
ESCO2
OR5L2
SLC25A44
CTDNEP1
ARL4A
WDR93
FAM153B

## Sheet: BP5
	p-value	q-value	term_goid	term_category	term_level	term_name	members_input_overlap	members_input_overlap_geneids	size	effective_size
3.51939	0.000302418	0.0506565	GO:0006984	b	5	ER-nucleus signaling pathway	440; 8720; 51360; 22937	SCAP; MBTPS2; ASNS; MBTPS1	42	42
3.23528	0.000581729	0.0506565	GO:0032661	b	5	regulation of interleukin-18 production	3586; 54106	IL10; TLR9	5	5
3.23488	0.000582258	0.0506565	GO:0016125	b	5	sterol metabolic process	19; 6721; 8720; 51360; 51422; 22937	MBTPS2; MBTPS1; PRKAG2; SREBF2; ABCA1; SCAP	133	133
3.06917	0.000852775	0.0556435	GO:0033619	b	5	membrane protein proteolysis	3586; 8720; 51360; 121665	IL10; SPPL3; MBTPS2; MBTPS1	55	55
2.70135	0.00198906	0.103829	GO:0009064	b	5	glutamine family amino acid metabolic process	440; 2730; 2744; 85300	GLS; GCLM; ASNS; ATCAY	69	69
2.59307	0.00255228	0.111024	GO:0032060	b	5	bleb assembly	1902; 196527	ANO6; LPAR1	10	10
2.36078	0.00435735	0.162467	GO:0010885	b	5	regulation of cholesterol storage	19; 6721	SREBF2; ABCA1	13	13
2.21811	0.00605193	0.197444	GO:0042991	b	5	transcription factor import into nucleus	1896; 3586; 54106; 121665	IL10; SPPL3; EDA; TLR9	94	94
2.07913	0.00833427	0.241694	GO:0032607	b	5	interferon-alpha production	3586; 54106	IL10; TLR9	18	18
1.98986	0.0102363	0.267167	GO:0051223	b	5	regulation of protein transport	283; 1459; 1896; 3172; 3586; 3753; 3782; 6721; 54106; 55107; 121665; 64083	SREBF2; EDA; IL10; GOLPH3; HNF4A; ANO1; KCNE1; SPPL3; ANG; KCNN3; TLR9; CSNK2A2	724	723
1.76939	0.0170062	0.367887	GO:0032800	b	5	receptor biosynthetic process	3586; 22937	IL10; SCAP	26	26
1.75217	0.0176942	0.367887	GO:0010565	b	5	regulation of cellular ketone metabolic process	5162; 5690; 51422; 85300; 22937	SCAP; PDHB; PRKAG2; PSMB2; ATCAY	196	195
1.73698	0.0183239	0.367887	GO:0070201	b	5	regulation of establishment of protein localization	283; 1459; 1896; 3172; 3586; 3753; 3782; 6721; 54106; 55107; 121665; 64083	SREBF2; EDA; IL10; GOLPH3; HNF4A; ANO1; KCNE1; SPPL3; ANG; KCNN3; TLR9; CSNK2A2	785	784
1.67927	0.020928	0.390157	GO:0006911	b	5	phagocytosis, engulfment	19; 196527	ANO6; ABCA1	29	29
1.52893	0.0295846	0.423735	GO:0046165	b	5	alcohol biosynthetic process	51422; 120227; 22937; 259230	SCAP; PRKAG2; SGMS1; CYP2R1	151	151
1.49315	0.0321256	0.423735	GO:0050851	b	5	antigen receptor-mediated signaling pathway	1493; 5788; 11119; 121665	CTLA4; PTPRC; SPPL3; BTN3A1	156	155
1.48133	0.0330118	0.423735	GO:0032386	b	5	regulation of intracellular transport	1459; 1896; 3586; 3753; 3782; 6721; 54106; 121665; 387129	EDA; IL10; NPSR1; SREBF2; SPPL3; KCNE1; KCNN3; TLR9; CSNK2A2	573	571
1.46474	0.0342973	0.423735	GO:0042158	b	5	lipoprotein biosynthetic process	19; 4939; 128869	OAS2; PIGU; ABCA1	92	92
1.46034	0.0346467	0.423735	GO:0002204	b	5	somatic recombination of immunoglobulin genes involved in immune response	3586; 5788	IL10; PTPRC	38	38
1.46034	0.0346467	0.423735	GO:0070169	b	5	positive regulation of biomineral tissue development	375056; 196527	ANO6; MIA3	38	38
1.44976	0.0355008	0.423735	GO:0007166	b	5	cell surface receptor signaling pathway	19; 1459; 1493; 1896; 1948; 2730; 3172; 4052; 135228; 4242; 4281; 4939; 5690; 5788; 10254; 11119; 79652; 51422; 54106; 22848; 121665; 154865; 57448; 91584; 25776; 259230; 27255; 196527	EFNB2; MFNG; BTN3A1; BIRC6; ANO6; PRKAG2; CNTN6; SGMS1; MID1; GCLM; IQUB; STAM2; CBY1; OAS2; TMEM204; CTLA4; LTBP1; SPPL3; AAK1; CSNK2A2; EDA; CD109; HNF4A; PLXNA4; PTPRC; ABCA1; TLR9; PSMB2	2578	2570
1.41568	0.0383992	0.423735	GO:0019752	b	5	carboxylic acid metabolic process	440; 1158; 2730; 2744; 3172; 5162; 5690; 100506658; 79152; 83440; 51422; 85300; 22937	GCLM; ATCAY; CKM; PRKAG2; HNF4A; ASNS; FA2H; ADPGK; OCLN; SCAP; PDHB; GLS; PSMB2	976	975
1.41059	0.0388519	0.423735	GO:0015833	b	5	peptide transport	19; 1896; 3172; 3586; 54106; 55107	EDA; IL10; HNF4A; ANO1; ABCA1; TLR9	324	322
1.40933	0.0389642	0.423735	GO:1903827	b	5	regulation of cellular protein localization	1459; 1896; 3586; 3753; 3782; 6721; 54106; 121665	EDA; IL10; SREBF2; SPPL3; KCNE1; KCNN3; TLR9; CSNK2A2	497	497
1.35769	0.0438843	0.447642	GO:0006915	b	5	apoptotic process	440; 1459; 1493; 1687; 1830; 1902; 2730; 3275; 3586; 5690; 5788; 100506658; 8883; 85300; 644186; 57448; 10296; 29775; 259230; 64083; 196527	MAEA; CTLA4; DFNA5; ATCAY; PRMT2; BIRC6; ANO6; CARD10; ASNS; PSMB2; IL10; SYCE3; GCLM; PTPRC; SGMS1; NAE1; OCLN; DSG3; LPAR1; CSNK2A2; GOLPH3	1846	1840
1.33273	0.0464807	0.447642	GO:0006310	b	5	DNA recombination	3586; 5788; 84083; 644186; 64859	IL10; SYCE3; PTPRC; ZRANB3; NABP1	254	253
1.32316	0.0475164	0.447642	GO:0007093	b	5	mitotic cell cycle checkpoint	1459; 5690; 8883; 64859	NAE1; NABP1; CSNK2A2; PSMB2	176	176
1.30912	0.0490776	0.447642	GO:0043067	b	5	regulation of programmed cell death	440; 1493; 1687; 1902; 2730; 3275; 3586; 5690; 5788; 8883; 644186; 57448; 10296; 29775; 259230; 64083; 196527	MAEA; CTLA4; DFNA5; GOLPH3; PRMT2; BIRC6; ANO6; CARD10; ASNS; IL10; SYCE3; GCLM; PTPRC; SGMS1; NAE1; LPAR1; PSMB2	1434	1430

## Sheet: BP4
	p-value	q-value	term_goid	term_category	term_level	term_name	members_input_overlap	members_input_overlap_geneids	size	effective_size
	0.000868177	0.142697	GO:0032621	b	4	interleukin-18 production	3586; 54106	IL10; TLR9	6	6
	0.000922341	0.142697	GO:0006066	b	4	alcohol metabolic process	19; 2710; 5959; 6721; 8720; 51422; 51360; 120227; 22937; 259230	PRKAG2; MBTPS2; MBTPS1; RDH5; SREBF2; SGMS1; ABCA1; SCAP; CYP2R1; GK	391	391
	0.0012093	0.142697	GO:0055098	b	4	response to low-density lipoprotein particle	19; 6721	SREBF2; ABCA1	7	7
	0.00255228	0.219743	GO:0060013	b	4	righting reflex	387129; 93986	FOXP2; NPSR1	10	10
	0.00310371	0.219743	GO:2000188	b	4	regulation of cholesterol homeostasis	3172; 6721	SREBF2; HNF4A	11	11
	0.00383716	0.220143	GO:1901605	b	4	alpha-amino acid metabolic process	440; 1158; 2730; 2744; 3172; 100506658; 85300	GCLM; ATCAY; CKM; HNF4A; ASNS; OCLN; GLS	257	257
	0.00505797	0.220143	GO:0010878	b	4	cholesterol storage	19; 6721	SREBF2; ABCA1	14	14
	0.00580675	0.220143	GO:0034616	b	4	response to laminar fluid shear stress	19; 6721	SREBF2; ABCA1	15	15
	0.00602918	0.220143	GO:0060711	b	4	labyrinthine layer development	3586; 80712; 57448	IL10; ESX1; BIRC6	48	48
	0.00675869	0.220143	GO:0010646	b	4	regulation of cell communication	19; 1459; 1687; 1896; 1902; 2730; 3172; 3275; 3586; 4052; 135228; 4281; 5690; 5788; 22848; 6721; 8775; 9894; 10254; 79652; 83592; 117289; 128869; 54106; 55107; 121665; 57448; 25776; 59340; 387129; 60370; 4242; 29775; 259230; 64083	MFNG; BIRC6; ANO1; SGMS1; MID1; GCLM; STAM2; GOLPH3; AKR1E2; CBY1; HRH4; TMEM204; NAPA; LTBP1; PRMT2; CARD10; NPSR1; SPPL3; AAK1; DFNA5; PIGU; TELO2; TLR9; CSNK2A2; EDA; TAGAP; IL10; CD109; HNF4A; SREBF2; PTPRC; ABCA1; AVPI1; LPAR1; PSMB2	3007	3001
	0.00706479	0.220143	GO:0008202	b	4	steroid metabolic process	19; 6721; 8720; 51422; 51360; 120227; 22937	MBTPS2; MBTPS1; PRKAG2; SREBF2; ABCA1; SCAP; CYP2R1	289	288
	0.00746247	0.220143	GO:0051050	b	4	positive regulation of transport	19; 283; 1459; 1896; 3586; 3753; 3782; 6721; 54106; 55107; 121665; 387129; 64083; 196527	EDA; ANG; IL10; ANO6; GOLPH3; ANO1; NPSR1; SREBF2; SPPL3; KCNE1; KCNN3; ABCA1; TLR9; CSNK2A2	873	871
	0.00916156	0.245403	GO:0009966	b	4	regulation of signal transduction	19; 1687; 1896; 1902; 2730; 3172; 3275; 3586; 4052; 135228; 4281; 5690; 5788; 22848; 9894; 10254; 79652; 117289; 128869; 54106; 121665; 57448; 25776; 59340; 387129; 60370; 4242; 29775; 259230; 64083	MFNG; BIRC6; SGMS1; MID1; GCLM; STAM2; GOLPH3; HRH4; TMEM204; CARD10; LTBP1; PRMT2; LPAR1; SPPL3; AAK1; DFNA5; PIGU; TELO2; NPSR1; CBY1; EDA; TAGAP; IL10; CD109; HNF4A; PTPRC; ABCA1; AVPI1; TLR9; PSMB2	2517	2513
	0.0097052	0.245403	GO:0032880	b	4	regulation of protein localization	283; 1459; 1896; 3172; 3586; 3753; 3782; 22848; 6721; 85300; 54106; 55107; 121665; 64083	SREBF2; EDA; ATCAY; IL10; GOLPH3; HNF4A; ANO1; KCNE1; SPPL3; AAK1; ANG; KCNN3; TLR9; CSNK2A2	900	899
	0.0209712	0.458975	GO:0031503	b	4	protein complex localization	1896; 3586; 54106	IL10; EDA; TLR9	76	76
	0.0235019	0.458975	GO:0050795	b	4	regulation of behavior	1902; 1948; 91584; 387129; 196527	EFNB2; ANO6; LPAR1; NPSR1; PLXNA4	211	210
	0.0289687	0.458975	GO:0001890	b	4	placenta development	283; 3586; 80712; 57448	IL10; ESX1; ANG; BIRC6	150	150
	0.0306371	0.458975	GO:0032507	b	4	maintenance of protein location in cell	3586; 83860; 64083	IL10; GOLPH3; TAF3	88	88
	0.0313596	0.458975	GO:0097035	b	4	regulation of membrane lipid distribution	19; 196527	ANO6; ABCA1	36	36
	0.0314303	0.458975	GO:1901617	b	4	organic hydroxy compound biosynthetic process	6490; 51422; 120227; 22937; 259230	SCAP; PRKAG2; SGMS1; PMEL; CYP2R1	227	227
	0.0314787	0.458975	GO:0043393	b	4	regulation of protein binding	3586; 121665; 53339; 4242	IL10; SPPL3; BTBD1; MFNG	154	154
	0.0317425	0.458975	GO:0009306	b	4	protein secretion	19; 283; 3172; 3586; 11119; 54106; 55107; 64083	ANG; BTN3A1; IL10; GOLPH3; HNF4A; ANO1; ABCA1; TLR9	478	477
	0.0321256	0.458975	GO:0050920	b	4	regulation of chemotaxis	1902; 1948; 91584; 196527	EFNB2; ANO6; LPAR1; PLXNA4	155	155
	0.0329869	0.458975	GO:0010324	b	4	membrane invagination	19; 196527	ANO6; ABCA1	37	37
	0.0346467	0.458975	GO:0043616	b	4	keratinocyte proliferation	1948; 135228	EFNB2; CD109	38	38
	0.0346467	0.458975	GO:0002208	b	4	somatic diversification of immunoglobulins involved in immune response	3586; 5788	IL10; PTPRC	38	38
	0.0363384	0.458975	GO:0010883	b	4	regulation of lipid storage	19; 6721	SREBF2; ABCA1	39	39
	0.0369157	0.458975	GO:1903829	b	4	positive regulation of cellular protein localization	1459; 1896; 3782; 6721; 54106; 121665	EDA; SREBF2; SPPL3; KCNN3; TLR9; CSNK2A2	318	318
	0.0396905	0.458975	GO:0046903	b	4	secretion	19; 283; 2744; 3172; 3586; 8775; 11119; 11311; 375056; 54106; 55107; 387129; 64083; 126567	VPS45; ANG; MIA3; TLR9; BTN3A1; IL10; GOLPH3; HNF4A; ANO1; NPSR1; C2CD4C; NAPA; ABCA1; GLS	1084	1081
	0.039826	0.458975	GO:0048523	b	4	negative regulation of cellular process	19; 283; 440; 1459; 1493; 1687; 1902; 1948; 2730; 3172; 3275; 3586; 3753; 4052; 135228; 4281; 5690; 5788; 6721; 8883; 10254; 10296; 83860; 84148; 51422; 375056; 80712; 84083; 85300; 54106; 57167; 57448; 25776; 59340; 387129; 93986; 259230; 64062; 64083; 64859; 54551	EFNB2; FOXP2; KCNE1; ZRANB3; BIRC6; PRKAG2; SGMS1; MID1; RBM26; GCLM; STAM2; GOLPH3; CBY1; HRH4; NAE1; NABP1; CTLA4; LTBP1; PRMT2; NPSR1; ESX1; ANG; MIA3; TLR9; CSNK2A2; MAEA; DFNA5; TAF3; ATCAY; SALL4; IL10; KAT8; CD109; HNF4A; ASNS; SREBF2; MAGEL2; PTPRC; ABCA1; LPAR1; PSMB2	4117	4104
	0.0401927	0.458975	GO:0032609	b	4	interferon-gamma production	3586; 11119; 54106	IL10; TLR9; BTN3A1	99	98
	0.0429529	0.475142	GO:0007005	b	4	mitochondrion organization	1459; 2730; 3782; 6721; 84269; 51422; 80207; 83592; 85300; 64083	GCLM; ATCAY; CHCHD5; GOLPH3; PRKAG2; AKR1E2; SREBF2; KCNN3; OPA3; CSNK2A2	695	695
	0.0444528	0.475142	GO:0060341	b	4	regulation of cellular localization	283; 1459; 1896; 3172; 3586; 3753; 3782; 6721; 8775; 54106; 55107; 121665; 387129; 64083; 126567	SREBF2; EDA; IL10; GOLPH3; HNF4A; ANO1; NPSR1; KCNE1; SPPL3; ANG; KCNN3; NAPA; TLR9; CSNK2A2; C2CD4C	1206	1202
	0.0471257	0.475142	GO:0016447	b	4	somatic recombination of immunoglobulin gene segments	3586; 5788	IL10; PTPRC	45	45
	0.0471257	0.475142	GO:0002381	b	4	immunoglobulin production involved in immunoglobulin mediated immune response	3586; 5788	IL10; PTPRC	46	45
	0.0483196	0.475142	GO:0012501	b	4	programmed cell death	440; 1459; 1493; 1687; 1830; 1902; 2730; 3275; 3586; 5690; 5788; 100506658; 8883; 10296; 85300; 644186; 57448; 29775; 259230; 64083; 196527	MAEA; CTLA4; DFNA5; ATCAY; PRMT2; BIRC6; ANO6; CARD10; ASNS; PSMB2; IL10; SYCE3; GCLM; PTPRC; SGMS1; NAE1; OCLN; DSG3; LPAR1; CSNK2A2; GOLPH3	1866	1860

## Sheet: MF4
	p-value	q-value	term_goid	term_category	term_level	term_name	members_input_overlap	members_input_overlap_geneids	size	effective_size
2.18027	0.00660289	0.307324	GO:0050431	m	4	transforming growth factor beta binding	4052; 135228	CD109; LTBP1	16	16
1.87162	0.0134394	0.307324	GO:0030552	m	4	cAMP binding	1262; 140894	CNBD2; CNGA4	23	23
1.64371	0.0227139	0.307324	GO:0042803	m	4	protein homodimerization activity	283; 440; 3172; 3275; 4281; 84313; 55107; 121665; 93986; 63951; 196527	FOXP2; ANG; VPS25; PRMT2; ANO6; DMRTA1; HNF4A; ASNS; ANO1; SPPL3; MID1	716	715
1.51375	0.0306371	0.307324	GO:0019905	m	4	syntaxin binding	19; 8775; 126567	C2CD4C; NAPA; ABCA1	89	88
1.50363	0.0313596	0.307324	GO:0030551	m	4	cyclic nucleotide binding	1262; 140894	CNBD2; CNGA4	36	36
1.36239	0.0434123	0.343172	GO:0032934	m	4	sterol binding	19; 22937	SCAP; ABCA1	43	43
1.30959	0.0490245	0.343172	GO:0005548	m	4	phospholipid transporter activity	19; 196527	ANO6; ABCA1	46	46

## Sheet: CC3
	p-value	q-value	term_goid	term_category	term_level	term_name	members_input_overlap	members_input_overlap_geneids	size	effective_size
2.76729	0.00170886	0.0561774	GO:0098588	c	3	bounding membrane of organelle	1262; 1896; 2710; 4242; 5959; 6490; 6721; 7805; 8720; 8775; 10254; 11311; 339983; 79152; 375056; 81790; 51313; 51360; 84313; 128869; 54106; 120227; 22937; 23065; 121665; 26002; 26872; 146664; 259230; 64083	FAM198B; MFNG; GOLPH3; LAPTM5; SGMS1; MOXD1; SCAP; VPS45; RNF170; VPS25; GK; STAM2; RDH5; MGAT5B; NAPA; SPPL3; CNGA4; PIGU; MIA3; CYP2R1; NAT8L; PMEL; EDA; MBTPS2; MBTPS1; FA2H; SREBF2; STEAP1; EMC1; TLR9	2246	2241
2.65698	0.00220303	0.0561774	GO:0044431	c	3	Golgi apparatus part	1262; 4242; 6721; 8720; 11311; 51313; 51360; 54106; 22937; 121665; 57448; 25776; 146664; 259230; 64083	VPS45; FAM198B; MFNG; MBTPS1; BIRC6; GOLPH3; SREBF2; SPPL3; CNGA4; SGMS1; SCAP; MBTPS2; TLR9; CBY1; MGAT5B	848	843
2.0504	0.00890424	0.117906	GO:0016021	c	3	integral component of membrane	19; 490; 1262; 1493; 1830; 1896; 1902; 1948; 2196; 3753; 3782; 4242; 5100; 5788; 6490; 6721; 100506658; 7805; 8720; 10296; 11119; 11311; 339983; 143502; 79050; 79152; 374462; 79652; 375056; 146167; 441608; 81790; 345757; 51313; 51360; 85019; 128869; 151188; 54106; 55107; 22937; 23065; 121665; 613212; 285761; 25829; 91584; 26002; 92014; 59340; 387129; 26872; 146664; 259230; 196527	EFNB2; KCNE1; MFNG; PCDH8; SPPL3; BTN3A1; ANO6; ANO1; LAPTM5; FAM198B; SGMS1; SCAP; MOXD1; NOC4L; CTXN3; VPS45; SLC25A51; NPSR1; RNF170; HRH4; TMEM204; OR5B3; DSG3; CTLA4; ATP2B1; ARL6IP6; SLC38A8; TMEM241; OR52I2; KCNN3; PIGU; MIA3; OCLN; TMEM184B; TLR9; NAT8L; MGAT5B; PMEL; MAEA; DCBLD1; EDA; MBTPS2; PTPRQ; MBTPS1; FAM174A; FA2H; PLXNA4; SREBF2; FAT2; PTPRC; ABCA1; STEAP1; CNGA4; EMC1; LPAR1	5402	5368
2.03398	0.0092475	0.117906	GO:0044432	c	3	endoplasmic reticulum part	1896; 5959; 6490; 6721; 8720; 339983; 79152; 375056; 81790; 128869; 54106; 120227; 22937; 23065; 121665; 26002	EDA; RNF170; CYP2R1; MBTPS1; RDH5; FA2H; SREBF2; SPPL3; PIGU; MIA3; MOXD1; SCAP; EMC1; TLR9; NAT8L; PMEL	1084	1081
1.75625	0.0175286	0.149377	GO:0005758	c	3	mitochondrial intermembrane space	4702; 84269; 64083	GOLPH3; NDUFA8; CHCHD5	71	71
1.75514	0.0175737	0.149377	GO:0044444	c	3	cytoplasmic part	19; 440; 1158; 1262; 1459; 1493; 1830; 1896; 1902; 2710; 2730; 2744; 3049; 3275; 3753; 4242; 4281; 4702; 4939; 5162; 5507; 5690; 5959; 22848; 6059; 6490; 6721; 100506658; 84269; 7805; 8720; 8775; 8883; 140894; 10254; 10296; 51027; 11311; 339983; 79152; 375056; 80207; 81790; 83440; 51313; 51360; 84313; 117289; 128869; 134359; 85300; 51422; 54106; 120227; 22937; 23065; 121665; 154865; 57448; 53339;…	OXNAD1; KCNE1; MFNG; SGMS1; CKM; BIRC6; POC5; FA2H; ABCE1; LAPTM5; FAM198B; ADPGK; MOXD1; SCAP; GLS; MID1; VPS45; SLC25A51; GCLM; PPP1R3C; CHCHD5; HBQ1; NAT8L; STAM2; RDH5; CBY1; HRH4; OAS2; MGAT5B; NAPA; DSG3; PDHB; IQUB; CTLA4; PRKAG2; CAPN8; CYP2R1; PRMT2; GOLPH3; CARD10; NDUFA8; SPPL3; AAK1; STEAP1; CNGA4; OPA3; MIA3; NAE1; OCLN; RNF170; TLR9; GK; CSNK2A2; PMEL; MAEA; EDA; MBTPS2; ATCAY; TAGA…	7800	7782
1.4617	0.0345385	0.251638	GO:0043231	c	3	intracellular membrane-bounded organelle	19; 283; 490; 1262; 1459; 1493; 1608; 1896; 1902; 2196; 2710; 2744; 3172; 3216; 3275; 3753; 4242; 4702; 4939; 5162; 5690; 5959; 22848; 6059; 6490; 6596; 6721; 100506658; 84269; 7805; 8331; 8720; 8775; 8883; 9894; 10254; 10296; 10794; 51027; 11311; 83860; 339983; 340385; 84148; 79050; 79152; 375056; 80207; 80712; 342908; 146310; 113835; 139135; 81790; 83440; 51313; 84083; 51360; 84313; 128869; 853…	KCNE1; ZRANB3; PRKAG2; LAPTM5; FAM198B; FNDC8; SYCE3; OAS2; NAPA; CAPN8; PRMT2; SPPL3; OPA3; ATP2B1; GK; CSNK2A2; PMEL; KAT8; RBM41; MBTPS2; MBTPS1; FA2H; PRR13; MAGEL2; ZKSCAN5; FAT2; ABCE1; FOXP2; ZNF596; CHCHD5; GOLPH3; NABP1; PDHB; ZNF517; CTLA4; HOXB6; CNGA4; MIA3; TELO2; CYP2R1; CBY1; TLR9; TAF3; FOXD4L5; HNF4A; BOP1; EMC1; MFNG; GLS; VPS45; SLC25A51; IQUB; MGAT5B; NAE1; RNF151; NDUFA8; SAL…	10643	10607

## Sheet: Pathway
	p-value	q-value	pathway	source	external_id	members_input_overlap	members_input_overlap_geneids	size	effective_size
4.27885	5.262e-05	0.00541986	Regulation of cholesterol biosynthesis by SREBP (SREBF)	Reactome	R-HSA-1655829	SREBF2; SCAP; MBTPS2; MBTPS1	51360; 6721; 22937; 8720	29	29
3.51246	0.000307287	0.0158253	ATF6-alpha activates chaperones	Reactome	R-HSA-381033	MBTPS2; MBTPS1	51360; 8720	4	4
2.69446	0.00202086	0.0693828	Alanine, aspartate and glutamate metabolism - Homo sapiens (human)	KEGG	path:hsa00250	GLS; NAT8L; ASNS	339983; 440; 2744	35	35
2.56454	0.00272556	0.0701833	Apoptotic cleavage of cell adhesion proteins	Reactome	R-HSA-351906	OCLN; DSG3	1830; 100506658	11	11
2.29186	0.00510665	0.105197	Unfolded Protein Response (UPR)	Reactome	R-HSA-381119	MBTPS2; MBTPS1	51360; 8720	15	15
2.13446	0.00733735	0.120103	Amino acid synthesis and interconversion (transamination)	Reactome	R-HSA-70614	GLS; ASNS	2744; 440	18	18
2.08819	0.00816231	0.120103	Other semaphorin interactions	Reactome	R-HSA-416700	PTPRC; PLXNA4	91584; 5788	19	19
1.92243	0.0119555	0.153927	Metabolism of lipids and lipoproteins	Reactome	R-HSA-556833	MBTPS2; MBTPS1; PRKAG2; SREBF2; SGMS1; ABCA1; SCAP; CYP2R1; GK	8720; 2710; 51360; 51422; 19; 120227; 22937; 259230; 6721	517	516
1.76192	0.0173014	0.198005	Endosomal Sorting Complex Required For Transport (ESCRT)	Reactome	R-HSA-917729	STAM2; VPS25	84313; 10254	28	28
1.67801	0.0209888	0.213298	Other types of O-glycan biosynthesis - Homo sapiens (human)	KEGG	path:hsa00514	MGAT5B; MFNG	4242; 146664	31	31
1.63361	0.0232483	0.213298	Metabolism of amino acids and derivatives	Reactome	R-HSA-71291	CKM; GCLM; GLS; ASNS	2730; 1158; 2744; 440	150	150
1.60255	0.0249719	0.213298	African trypanosomiasis - Homo sapiens (human)	KEGG	path:hsa05143	IL10; TLR9	3586; 54106	34	34
1.56991	0.0269211	0.213298	Membrane Trafficking	Reactome	R-HSA-199991	STAM2; PRKAG2; NAPA; VPS25	10254; 51422; 84313; 8775	157	157
1.5126	0.0307184	0.226	Apoptotic cleavage of cellular proteins	Reactome	R-HSA-111465	OCLN; DSG3	100506658; 1830	38	38
1.40399	0.0394466	0.243266	T cell receptor signaling pathway - Homo sapiens (human)	KEGG	path:hsa04660	IL10; CTLA4; PTPRC	3586; 5788; 1493	104	104
1.3957	0.0402069	0.243266	Signaling by Retinoic Acid	Reactome	R-HSA-5362517	PDHB; RDH5	5959; 5162	44	44
1.39133	0.0406135	0.243266	Generic Transcription Pathway	Reactome	R-HSA-212436	PRKAG2; HNF4A; ZNF257; ZNF596; ZKSCAN5; ZNF460; GLS; ZNF517	2744; 23660; 113835; 169270; 10794; 51422; 340385; 3172	541	539
1.35447	0.0442111	0.243266	Herpes simplex infection - Homo sapiens (human)	KEGG	path:hsa05168	OAS2; TAF3; CSNK2A2; TLR9	4939; 54106; 83860; 1459	184	184
1.31118	0.048845	0.243266	Malaria - Homo sapiens (human)	KEGG	path:hsa05144	IL10; TLR9	3586; 54106	49	49
